# Supplementary material for: Gene Expression Analysis of Forskolin Treated Basilar Papillae Identifies MicroRNA181a as a Mediator of Proliferation
Source: PLoS One. 2010 Jul 9;5(7):e11502. doi: 10.1371/journal.pone.0011502 (PMC2901389; doi:10.1371/journal.pone.0011502)
Supplement: Table S4 — Gene set enrichment analysis statistics. Curated gene sets enriched in the control and forskolin samples after 24 hours. (0.25 MB XLS) [file pone.0011502.s004.xls]

## Sheet: Sheet1
Gene Set Name	Enriched in Control/Forskolin?	Gene Set Size	Enrichment Score	Normalized Enrichment Score	P-Value	False Discovery Rate (Q-Value)
HSA04080_NEUROACTIVE_LIGAND_RECEPTOR_INTERACTION	Control	190	0.212374	3.42919	0	0
FLECHNER_KIDNEY_TRANSPLANT_REJECTION_DN	Control	380	0.153908	3.42028	0	0
HSA00190_OXIDATIVE_PHOSPHORYLATION	Control	75	0.266882	2.71235	0	0.00397937
BRCA_ER_POS	Control	351	0.12531	2.7083	0	0.00298453
IDX_TSA_UP_CLUSTER6	Control	122	0.21159	2.69866	0	0.00255657
UVB_NHEK3_C8	Control	56	0.304619	2.65395	0	0.00282907
FLECHNER_KIDNEY_TRANSPLANT_WELL_UP	Control	375	0.118676	2.61186	0	0.00436022
HSA00010_GLYCOLYSIS_AND_GLUCONEOGENESIS	Control	38	0.354818	2.59621	0.0039604	0.00434421
ELECTRON_TRANSPORT_CHAIN	Control	69	0.263747	2.56835	0	0.00506256
MITOCHONDRIA	Control	277	0.126962	2.42037	0	0.0150126
AGEING_KIDNEY_SPECIFIC_UP	Control	128	0.181871	2.40446	0	0.0154891
GLUCONEOGENESIS	Control	34	0.340751	2.37585	0	0.0178623
GLYCOLYSIS	Control	34	0.340751	2.37064	0	0.0168653
HYPOXIA_REVIEW	Control	58	0.267694	2.35395	0	0.017656
TPA_RESIST_LATE_DN	Control	49	0.276806	2.30291	0	0.0232718
SERUM_FIBROBLAST_CORE_DN	Control	127	0.174269	2.28135	0	0.0256671
ET743_SARCOMA_72HRS_UP	Control	44	0.285628	2.2771	0	0.0250416
MENSE_HYPOXIA_UP	Control	67	0.234939	2.25817	0	0.0269897
RORIE_ES_PNET_DN	Control	19	0.414008	2.20382	0.0019685	0.0364504
IL1_CORNEA_DN	Control	48	0.265286	2.19363	0	0.0370651
JISON_SICKLECELL_DIFF	Control	212	0.131997	2.17957	0.00193424	0.0387483
RIBOSOMAL_PROTEINS	Control	67	0.218907	2.17527	0.00196464	0.038343
PENG_GLUTAMINE_UP	Control	146	0.154175	2.17119	0.00202429	0.0376299
TNFALPHA_ADIP_DN	Control	44	0.268893	2.16949	0.00197628	0.0364873
ESR_FIBROBLAST_UP	Control	36	0.305322	2.16376	0.00198413	0.0364441
NADLER_OBESITY_UP	Control	27	0.349572	2.15586	0	0.0366345
BHATTACHARYA_ESC_UP	Control	46	0.265337	2.14327	0	0.0381229
BRCA_BRCA1_NEG	Control	107	0.172379	2.12604	0	0.0415213
CARBON_FIXATION	Control	15	0.456097	2.11985	0.00603622	0.0420273
CHIARETTI_T_ALL	Control	162	0.141556	2.11276	0.0020284	0.0423128
HSA00710_CARBON_FIXATION	Control	15	0.456097	2.10971	0.00595238	0.0416489
MOOTHA_VOXPHOS	Control	53	0.235825	2.08833	0.0019802	0.0464479
XPB_TTD-CS_UP	Control	22	0.369386	2.0812	0.00381679	0.0473861
VHL_NORMAL_UP	Control	298	0.104202	2.07161	0.00199601	0.049187
GENOTOXINS_4HRS_DISCR	Control	21	0.378118	2.05728	0.00604839	0.0525517
INNEREAR_UP	Control	26	0.331747	2.04747	0	0.0538597
HOHENKIRK_MONOCYTE_DEND_UP	Control	72	0.205862	2.04607	0	0.052838
IRS1_KO_ADIP_DN	Control	88	0.184168	2.04	0.0100402	0.0537674
HSA00480_GLUTATHIONE_METABOLISM	Control	18	0.399045	2.0381	0	0.0531066
HIPPOCAMPUS_DEVELOPMENT_POSTNATAL	Control	30	0.321317	2.02598	0.00208333	0.0555793
PYRUVATE_METABOLISM	Control	29	0.311176	2.01771	0.00588235	0.0570236
ADIP_DIFF_UP	Control	50	0.237852	2.01073	0.00598802	0.0580129
IGLESIAS_E2FMINUS_UP	Control	103	0.168631	2.00751	0.00616016	0.057908
PASSERINI_EM	Control	30	0.308617	2.00092	0.00806452	0.0589803
LEI_MYB_REGULATED_GENES	Control	187	0.124199	1.97946	0.00596422	0.0653812
HYPOXIA_NORMAL_UP	Control	154	0.140198	1.97539	0	0.0655879
HSA00903_LIMONENE_AND_PINENE_DEGRADATION	Control	21	0.357539	1.96956	0.00404858	0.0664934
SANA_TNFA_ENDOTHELIAL_DN	Control	58	0.218469	1.9663	0.00784314	0.0664584
UVC_TTD_8HR_DN	Control	131	0.146406	1.96483	0.00199601	0.0655667
CROONQUIST_RAS_STROMA_DN	Control	17	0.401611	1.94916	0.0102041	0.0705113
HSA03010_RIBOSOME	Control	46	0.241039	1.94095	0.00767754	0.0723436
UVB_NHEK2_UP	Control	33	0.279969	1.93302	0.0018797	0.0743922
UVB_NHEK2_DN	Control	55	0.218698	1.93207	0.00779727	0.0736426
UVB_NHEK1_C1	Control	31	0.28829	1.92797	0.00770713	0.073936
BREASTCA_TWO_CLASSES	Control	107	0.15892	1.92184	0.00606061	0.0751729
ADIP_DIFF_CLUSTER1	Control	41	0.249015	1.92169	0.0111524	0.073905
CHAUHAN_2ME2	Control	37	0.256945	1.92105	0.0059761	0.0727862
GLUTATHIONE_METABOLISM	Control	15	0.410082	1.92036	0.0120724	0.0718201
CREB_BRAIN_8WKS_UP	Control	55	0.222304	1.91956	0.00594059	0.0709321
CHIARETTI_T_ALL_DIFF	Control	176	0.122874	1.91644	0.0101833	0.0709719
MATSUDA_VALPHAINKT_DIFF	Control	280	0.0969559	1.90631	0.00382409	0.0738552
TGFBETA_EARLY_UP	Control	36	0.264683	1.90617	0.0102881	0.0727174
FALT_BCLL_IG_MUTATED_VS_WT_UP	Control	29	0.290523	1.90484	0.00592885	0.0718307
HSA04512_ECM_RECEPTOR_INTERACTION	Control	68	0.197861	1.89944	0.00201207	0.0729682
HSA00071_FATTY_ACID_METABOLISM	Control	30	0.29028	1.88912	0.0093985	0.076086
PRMT5_KD_UP	Control	125	0.145967	1.8887	0.0113852	0.0750714
CROONQUIST_IL6_STROMA_UP	Control	27	0.29996	1.87163	0.011811	0.0810134
HSA00030_PENTOSE_PHOSPHATE_PATHWAY	Control	17	0.374329	1.86871	0.00613497	0.0812695
HSA00620_PYRUVATE_METABOLISM	Control	30	0.290464	1.86632	0.00610998	0.0811252
RUTELLA_HEMATOGFSNDCS_DIFF	Control	411	0.0799911	1.86027	0.00790514	0.0823864
VEGF_MMMEC_ALL_UP	Control	64	0.199971	1.86027	0.0122699	0.081226
ZHANG_EFT_EWSFLI1_UP	Control	61	0.204448	1.8581	0.0139165	0.080946
ET743_SARCOMA_UP	Control	44	0.24003	1.85281	0.00990099	0.0824614
GLYCOLYSIS_AND_GLUCONEOGENESIS	Control	24	0.315382	1.85199	0.011976	0.0815961
PENTOSE_PHOSPHATE_PATHWAY	Control	17	0.374329	1.83843	0.00772201	0.0871586
NOVA2_KO_SPLICING	Control	33	0.273299	1.83828	0.0140845	0.0860883
HSA00624_1_AND_2_METHYLNAPHTHALENE_DEGRADATION	Control	18	0.350017	1.83538	0.0139721	0.0864583
PROPANOATE_METABOLISM	Control	24	0.313159	1.82799	0.0157171	0.0893598
HSA01430_CELL_COMMUNICATION	Control	72	0.18153	1.8266	0.00980392	0.0888181
IRS_KO_ADIP_DN	Control	34	0.266209	1.82452	0.0157171	0.0884406
BOQUEST_CD31PLUS_VS_CD31MINUS_DN	Control	186	0.115122	1.82376	0.0175781	0.0877328
NING_COPD_DN	Control	66	0.188871	1.81663	0.0116959	0.0899051
HSA00640_PROPANOATE_METABOLISM	Control	26	0.303571	1.81454	0.01002	0.089896
KANG_TERT_UP	Control	59	0.203242	1.81354	0.0117878	0.0892999
HTERT_UP	Control	48	0.2244	1.81321	0.0119522	0.088404
GPCRDB_OTHER	Control	30	0.281278	1.80996	0.008	0.0889352
OXIDATIVE_PHOSPHORYLATION	Control	40	0.243604	1.80643	0.0165975	0.08972
ADIPOGENESIS_HMSC_CLASS8_DN	Control	27	0.304078	1.80558	0.0160321	0.0889572
HDACI_COLON_SUL16HRS_DN	Control	49	0.219217	1.80549	0.0161943	0.0879958
HSA04020_CALCIUM_SIGNALING_PATHWAY	Control	127	0.133051	1.79367	0.0218254	0.0929467
HDACI_COLON_SUL48HRS_DN	Control	61	0.194603	1.79049	0.00623701	0.0933534
VERHAAK_AML_NPM1_MUT_VS_WT_DN	Control	158	0.125449	1.79009	0.0193798	0.0925496
IDX_TSA_DN_CLUSTER3	Control	54	0.201646	1.78815	0.0075188	0.0924244
NELSON_ANDROGEN_UP	Control	46	0.221042	1.78676	0.0060241	0.0922238
FRASOR_ER_DN	Control	43	0.223915	1.76638	0.0138614	0.101228
KENNY_WNT_DN	Control	33	0.25959	1.75865	0.0153846	0.104667
AGED_MOUSE_CEREBELLUM_DN	Control	35	0.248983	1.75421	0.0156556	0.105971
AGEING_BRAIN_UP	Control	154	0.124552	1.74756	0.0137255	0.108859
HSA00280_VALINE_LEUCINE_AND_ISOLEUCINE_DEGRADATION	Control	36	0.243805	1.74468	0.0210526	0.109251
BRG1_H1299_UP	Control	23	0.298508	1.73496	0.0242915	0.114167
MANALO_HYPOXIA_UP	Control	71	0.179001	1.73336	0.034413	0.114079
HSA04120_UBIQUITIN_MEDIATED_PROTEOLYSIS	Control	29	0.271043	1.72203	0.0246407	0.119852
LEE_DENA_DN	Control	49	0.20791	1.71966	0.0337302	0.120198
ROS_MOUSE_AORTA_UP	Control	18	0.337758	1.71771	0.0246407	0.120245
HDACI_COLON_SUL_DN	Control	155	0.121441	1.71578	0.0219124	0.120278
BOQUEST_CD31PLUS_VS_CD31MINUS_UP	Control	429	0.0723527	1.71201	0.0268595	0.121226
HSA00980_METABOLISM_OF_XENOBIOTICS_BY_CYTOCHROME_P450	Control	20	0.315684	1.70414	0.0373281	0.124836
IRITANI_ADPROX_VASC	Control	105	0.145223	1.69734	0.027027	0.128103
LEE_ACOX1_UP	Control	42	0.218172	1.69459	0.0253411	0.128778
CHEN_HOXA5_TARGETS_DN	Control	19	0.32177	1.69385	0.0176125	0.128167
GH_EXOGENOUS_LATE_UP	Control	40	0.229276	1.66937	0.0337972	0.14362
TNFALPHA_TGZ_ADIP_DN	Control	20	0.3018	1.66286	0.0298211	0.14697
HYPOPHYSECTOMY_RAT_DN	Control	35	0.238948	1.65809	0.0290456	0.149079
ABBUD_LIF_UP	Control	31	0.253213	1.65638	0.036961	0.149002
HDACI_COLON_BUT24HRS_DN	Control	74	0.159759	1.64911	0.0199601	0.153418
CMV_HCMV_TIMECOURSE_ALL_DN	Control	284	0.0849872	1.64808	0.0334646	0.15283
FATTY_ACID_METABOLISM	Control	49	0.194926	1.63204	0.042065	0.163778
VEGF_MMMEC_3HRS_UP	Control	41	0.213783	1.63184	0.0282828	0.162569
CAMPTOTHECIN_PROBCELL_DN	Control	19	0.307797	1.62941	0.0285714	0.163088
ROME_INSULIN_2F_UP	Control	130	0.121639	1.62085	0.0538462	0.168501
HSA00632_BENZOATE_DEGRADATION_VIA_COA_LIGATION	Control	22	0.284357	1.60903	0.0444015	0.176547
HSC_HSCANDPROGENITORS_FETAL	Control	396	0.0693105	1.60612	0.040568	0.177622
ELONGINA_KO_UP	Control	136	0.11833	1.60511	0.0417537	0.177105
CHANG_SERUM_RESPONSE_DN	Control	84	0.148739	1.60499	0.0395833	0.175724
HSA03320_PPAR_SIGNALING_PATHWAY	Control	51	0.192266	1.60192	0.0394477	0.176722
IDX_TSA_DN_CLUSTER5	Control	33	0.238473	1.60161	0.037422	0.175599
ELECTRON_TRANSPORTER_ACTIVITY	Control	69	0.163862	1.5973	0.0448343	0.17794
BRCA1_OVEREXP_UP	Control	116	0.125425	1.59618	0.0407767	0.177463
4NQO_ESR_WS_UNREG	Control	24	0.271926	1.5957	0.0367505	0.176538
AGED_MOUSE_HYPOTH_UP	Control	32	0.239218	1.59398	0.0361905	0.176369
NING_COPD_UP	Control	95	0.139257	1.59276	0.0361217	0.17591
UVB_NHEK3_C6	Control	22	0.289286	1.58619	0.054902	0.180113
BETA_ALANINE_METABOLISM	Control	19	0.297217	1.58264	0.0380762	0.181821
HSA04610_COMPLEMENT_AND_COAGULATION_CASCADES	Control	52	0.184005	1.5815	0.0480962	0.181603
HSC_HSCANDPROGENITORS_SHARED	Control	396	0.0693105	1.57917	0.034413	0.182218
BASSO_HCL_DIFF	Control	56	0.179518	1.57125	0.0299401	0.187762
ADIP_HUMAN_DN	Control	19	0.301251	1.56955	0.0490798	0.187979
HDACI_COLON_BUT16HRS_DN	Control	75	0.153792	1.53697	0.0492126	0.217067
GH_AUTOCRINE_DN	Control	96	0.134179	1.5359	0.0580271	0.216618
EMT_UP	Control	36	0.218679	1.53459	0.0742268	0.216456
LYSINE_DEGRADATION	Control	20	0.288367	1.53339	0.0591837	0.216096
HSA00563_GLYCOSYLPHOSPHATIDYLINOSITOL_ANCHOR_BIOSYNTHESIS	Control	18	0.29803	1.5299	0.0742268	0.218058
CTNNB1_ONCOGENIC_SIGNATURE	Control	55	0.176864	1.51823	0.0589319	0.228823
ST_WNT_CA2_CYCLIC_GMP_PATHWAY	Control	17	0.304204	1.51295	0.0652174	0.232406
ATRIA_UP	Control	125	0.117292	1.50707	0.0669546	0.237163
HDACI_COLON_BUT12HRS_DN	Control	55	0.174591	1.5056	0.0740741	0.237075
UVB_SCC_UP	Control	62	0.162515	1.49368	0.0707269	0.248436
AGEING_KIDNEY_UP	Control	232	0.0850247	1.49348	0.0700219	0.246981
IDX_TSA_UP_CLUSTER1	Control	15	0.317828	1.49203	0.0802469	0.246936
LI_FETAL_VS_WT_KIDNEY_UP	Control	135	0.111095	1.4919	0.0630081	0.24542
ZHAN_MM_CD138_MS_VS_REST	Control	32	0.220528	1.49163	0.0618956	0.244095
POMEROY_MD_TREATMENT_GOOD_VS_POOR_UP	Control	19	0.283866	1.49082	0.0751566	0.243536
GUO_HEX_DN	Control	42	0.18826	1.48258	0.0811881	0.250876
NICK_RHAPC_UP	Control	21	0.272131	1.47101	0.0715631	0.262002
GRANDVAUX_IRF3_DN	Control	17	0.301252	1.47053	0.0941176	0.260955
HSA04740_OLFACTORY_TRANSDUCTION	Control	19	0.284764	1.46861	0.0877193	0.261454
LEE_CIP_UP	Control	44	0.192773	1.46337	0.082495	0.265892
YAO_P4_KO_VS_WT_UP	Control	46	0.188033	1.46319	0.0914634	0.264429
OXSTRESS_RPETHREE_DN	Control	17	0.295189	1.45935	0.101392	0.267362
HADDAD_HSC_CD7_UP	Control	36	0.205092	1.45489	0.0806142	0.270897
HSC_HSCANDPROGENITORS_ADULT	Control	404	0.0633266	1.45027	0.088	0.274779
HSA00020_CITRATE_CYCLE	Control	18	0.280908	1.44764	0.111111	0.276019
HADDAD_CD45CD7_PLUS_VS_MINUS_UP	Control	36	0.205092	1.44443	0.0702811	0.278093
NGUYEN_KERATO_UP	Control	22	0.25642	1.44273	0.0873786	0.278371
GH_EXOGENOUS_ANY_UP	Control	149	0.100608	1.43972	0.075	0.280159
BAF57_BT549_UP	Control	166	0.096767	1.43803	0.088843	0.280476
ZHAN_MM_CD138_LB_VS_REST	Control	18	0.286723	1.43706	0.0905512	0.280062
POD1_KO_UP	Control	257	0.0773255	1.4368	0.0885827	0.278713
FALT_BCLL_DN	Control	31	0.217119	1.43596	0.0948454	0.27816
VEGF_MMMEC_12HRS_UP	Control	22	0.254464	1.4339	0.1	0.278968
IDX_TSA_UP_CLUSTER2	Control	46	0.184683	1.43373	0.0929752	0.277553
WELCSH_BRCA_UP	Control	30	0.218478	1.43288	0.0833333	0.27687
HOGERKORP_CD44_UP	Control	16	0.299002	1.42458	0.105675	0.285049
JISON_SICKLE_CELL	Control	21	0.253129	1.42372	0.100394	0.284471
BCNU_GLIOMA_MGMT_24HRS_DN	Control	15	0.310006	1.42206	0.109442	0.284985
PROSTAGLANDIN_SYNTHESIS_REGULATION	Control	20	0.265233	1.42202	0.09375	0.283419
VENTRICLES_UP	Control	142	0.101945	1.42164	0.0821355	0.28225
HIF1_TARGETS	Control	26	0.235901	1.42025	0.0954274	0.28237
HCC_SURVIVAL_GOOD_VS_POOR_UP	Control	73	0.141366	1.42005	0.0814664	0.281015
KREBS_TCA_CYCLE	Control	19	0.269154	1.41953	0.103922	0.280085
TGFBETA_ALL_UP	Control	64	0.148362	1.41723	0.0869565	0.281364
TPA_RESIST_EARLY_DN	Control	52	0.167525	1.41557	0.0907258	0.281733
GNATENKO_PLATELET	Control	25	0.23893	1.41488	0.0874752	0.281003
CPR_NULL_LIVER_UP	Control	24	0.236783	1.41336	0.106996	0.28122
LEE_MYC_E2F1_UP	Control	33	0.208635	1.40987	0.111111	0.283746
GNATENKO_PLATELET_UP	Control	25	0.23893	1.40743	0.101289	0.285156
PARK_RARALPHA_UP	Control	26	0.232772	1.40704	0.0901639	0.284108
HSA00410_BETA_ALANINE_METABOLISM	Control	19	0.266931	1.40328	0.104331	0.286877
VEGF_MMMEC_6HRS_UP	Control	41	0.179314	1.40008	0.121154	0.289289
IRITANI_ADPROX_DN	Control	40	0.187741	1.39971	0.117764	0.288223
AGED_RHESUS_DN	Control	83	0.131961	1.3944	0.100196	0.29274
LE_MYELIN_DN	Control	71	0.139306	1.39131	0.110454	0.294885
PENG_GLUCOSE_UP	Control	15	0.296961	1.39128	0.104563	0.293392
ABRAHAM_MM_VS_AL_DN	Control	18	0.265435	1.3887	0.124248	0.294863
STEMCELL_COMMON_DN	Control	39	0.188799	1.38834	0.106509	0.293812
ET743_RESIST_DN	Control	29	0.218114	1.37962	0.13278	0.302667
UVC_HIGH_D6_DN	Control	22	0.243913	1.37342	0.130522	0.308785
ET743_SARCOMA_6HRS_UP	Control	18	0.272453	1.37227	0.104651	0.308683
PARK_MSCS_LIN2	Control	30	0.209079	1.37151	0.105155	0.308121
HYPOXIA_REG_UP	Control	25	0.223535	1.36816	0.125	0.310846
DORSAM_HOXA9_UP	Control	27	0.224029	1.36305	0.127119	0.316015
HDACI_COLON_SUL24HRS_DN	Control	90	0.121955	1.3617	0.129293	0.316175
YAGI_AML_PROG_FAB	Control	127	0.104248	1.36058	0.140244	0.316049
LEE_E2F1_DN	Control	45	0.169666	1.3596	0.123984	0.315666
PENG_LEUCINE_UP	Control	62	0.146975	1.35909	0.125969	0.314847
OLDONLY_FIBRO_DN	Control	33	0.200293	1.35614	0.118774	0.316958
FERRANDO_MLL_T_ALL_UP	Control	52	0.160209	1.35357	0.139579	0.318873
CMV_HCMV_TIMECOURSE_24HRS_DN	Control	29	0.207649	1.34857	0.117417	0.323642
CHESLER_HIGHEST_FOLD_RANGE_GENES	Control	26	0.218953	1.34819	0.130346	0.32259
TAKEDA_NUP8_HOXA9_6H_DN	Control	25	0.221985	1.34811	0.125	0.321135
ET743PT650_COLONCA_DN	Control	33	0.198283	1.34584	0.126506	0.322603
ZHAN_MM_CD1_VS_CD2_DN	Control	30	0.205195	1.34553	0.144841	0.3215
HTERT_DN	Control	54	0.156343	1.34474	0.141129	0.320976
HSA04640_HEMATOPOIETIC_CELL_LINEAGE	Control	44	0.170694	1.34263	0.135081	0.322181
TAKEDA_NUP8_HOXA9_16D_DN	Control	125	0.103283	1.34191	0.157692	0.321529
ARGININE_AND_PROLINE_METABOLISM	Control	32	0.197849	1.33773	0.126459	0.325336
LIAN_MYELOID_DIFF_GRANULE	Control	16	0.280791	1.33501	0.122772	0.327186
INFLAMMATORY_RESPONSE_PATHWAY	Control	23	0.231928	1.3349	0.136957	0.325767
CELL_ADHESION_RECEPTOR_ACTIVITY	Control	21	0.24362	1.33396	0.155303	0.325287
WERNERONLY_FIBRO_DN	Control	37	0.184622	1.33266	0.133065	0.325369
INOS_ALL_DN	Control	50	0.157564	1.33255	0.151394	0.324057
FETAL_LIVER_VS_ADULT_LIVER_GNF2	Control	35	0.19192	1.3294	0.157447	0.32655
ABRAHAM_AL_VS_MM_UP	Control	18	0.265435	1.3236	0.14611	0.332618
HOGERKORP_ANTI_CD44_UP	Control	17	0.272258	1.31921	0.162109	0.33686
VALINE_LEUCINE_AND_ISOLEUCINE_DEGRADATION	Control	30	0.204743	1.31586	0.165029	0.339904
AGED_MOUSE_HYPOTH_DN	Control	28	0.209676	1.31519	0.156379	0.339396
DFOSB_BRAIN_2WKS_UP	Control	31	0.198416	1.30819	0.15	0.347269
HSA01031_GLYCAN_STRUCTURES_BIOSYNTHESIS_2	Control	47	0.159179	1.30775	0.16568	0.346296
UVB_NHEK1_UP	Control	89	0.120313	1.30655	0.147638	0.34634
UVB_NHEK3_C7	Control	36	0.182656	1.30394	0.163065	0.348358
ZHAN_MM_CD138_CD1_VS_REST	Control	26	0.215973	1.30282	0.158763	0.348422
MENSE_HYPOXIA_TRANSPORTER_GENES	Control	38	0.179062	1.30012	0.174737	0.35047
HSA00510_N_GLYCAN_BIOSYNTHESIS	Control	31	0.192324	1.29801	0.170833	0.351752
AGEING_KIDNEY_DN	Control	89	0.115802	1.2951	0.149194	0.354335
CALCIUM_REGULATION_IN_CARDIAC_CELLS	Control	95	0.114896	1.27664	0.185111	0.378061
RUTELLA_HEPATGFSNDCS_UP	Control	97	0.11144	1.27235	0.175781	0.382317
LEE_MYC_TGFA_UP	Control	35	0.179373	1.27093	0.174699	0.38279
KUMAR_HOXA_DIFF	Control	225	0.0734278	1.26935	0.189135	0.383401
JNK_DN	Control	23	0.2191	1.26643	0.188285	0.385678
HSA00512_O_GLYCAN_BIOSYNTHESIS	Control	26	0.211714	1.25969	0.180392	0.394124
HSA00564_GLYCEROPHOSPHOLIPID_METABOLISM	Control	55	0.143379	1.25914	0.178423	0.39337
HADDAD_CD45CD7_PLUS_VS_MINUS_DN	Control	58	0.141308	1.25724	0.190381	0.394448
LEE_TCELLS6_UP	Control	18	0.250241	1.25283	0.202703	0.399389
CMV_HCMV_TIMECOURSE_4HRS_DN	Control	21	0.229016	1.25188	0.196653	0.399154
ROSS_AML1_ETO	Control	48	0.154428	1.24977	0.186837	0.40064
MAMMARY_DEV_UP	Control	37	0.169679	1.24399	0.193294	0.40753
HADDAD_HSC_CD7_DN	Control	58	0.141308	1.24386	0.175847	0.406095
SANSOM_APC_5_DN	Control	212	0.073636	1.24327	0.197292	0.405289
ALCALAY_AML_NPMC_DN	Control	125	0.0964994	1.23963	0.210216	0.409054
HDACI_COLON_TSA_DN	Control	43	0.159659	1.23819	0.195426	0.409566
STARCH_AND_SUCROSE_METABOLISM	Control	18	0.249154	1.23554	0.229703	0.412038
SMITH_HTERT_DN	Control	40	0.164655	1.23522	0.207031	0.410873
TSADAC_RKOSILENT_UP	Control	15	0.268382	1.23489	0.219608	0.409726
LEE_MYC_E2F1_DN	Control	46	0.150426	1.23424	0.198783	0.408993
INTRINSICPATHWAY	Control	19	0.233789	1.23287	0.21161	0.409481
APPEL_IMATINIB_UP	Control	18	0.240129	1.23099	0.22334	0.41056
AGEING_KIDNEY_SPECIFIC_DN	Control	96	0.107419	1.22019	0.204365	0.425313
TSA_HEPATOMA_UP	Control	20	0.222998	1.2192	0.217143	0.425256
ZUCCHI_EPITHELIAL_UP	Control	29	0.191882	1.21134	0.219802	0.435379
MPRPATHWAY	Control	15	0.251367	1.20638	0.221557	0.441286
ROSS_MLL_FUSION	Control	43	0.155462	1.20606	0.210309	0.44012
SANA_IFNG_ENDOTHELIAL_DN	Control	58	0.13242	1.20339	0.230174	0.442608
HDACI_COLON_SUL16HRS_UP	Control	25	0.206079	1.20314	0.230461	0.441349
JECHLINGER_EMT_UP	Control	31	0.183577	1.2002	0.237721	0.444355
NI2_MOUSE_DN	Control	27	0.19623	1.19593	0.225	0.44964
HSA01032_GLYCAN_STRUCTURES_DEGRADATION	Control	21	0.218755	1.19584	0.223602	0.448139
HUMAN_TISSUE_LIVER	Control	15	0.251137	1.19515	0.232143	0.447599
HSA00330_ARGININE_AND_PROLINE_METABOLISM	Control	27	0.194006	1.19026	0.236515	0.453621
MYOD_NIH3T3_DN	Control	41	0.157945	1.18973	0.25	0.452746
BRCA_PROGNOSIS_POS	Control	29	0.182258	1.18964	0.231263	0.451191
NAB_LUNG_UP	Control	19	0.231499	1.1896	0.258064	0.449591
TSA_HEPATOMA_CANCER_UP	Control	25	0.200347	1.1871	0.241176	0.451797
CROMER_HYPOPHARYNGEAL_MET_VS_NON_DN	Control	49	0.142841	1.18195	0.246575	0.458262
TRNA_SYNTHETASES	Control	15	0.25452	1.17491	0.244361	0.468041
CELL_ADHESION_MOLECULE_ACTIVITY	Control	62	0.12732	1.17445	0.245059	0.467044
BCNU_GLIOMA_MGMT_48HRS_DN	Control	88	0.108496	1.17424	0.260618	0.465649
LH_GRANULOSA_UP	Control	59	0.130784	1.17289	0.28	0.466276
HSA00500_STARCH_AND_SUCROSE_METABOLISM	Control	44	0.14829	1.17026	0.266402	0.468602
WALLACE_JAK2_DIFF	Control	17	0.234687	1.16548	0.257143	0.474203
SCHURINGA_STAT5A_UP	Control	15	0.24085	1.15899	0.276952	0.482821
BYSTRYKH_HSC_BRAIN_CIS_GLOCUS	Control	33	0.167406	1.15141	0.259635	0.493387
GH_EXOGENOUS_MIDDLE_UP	Control	58	0.126704	1.14649	0.266402	0.499813
METASTASIS_ADENOCARC_DN	Control	20	0.214706	1.1408	0.296078	0.507367
HEMATOP_STEM_ALL_UP	Control	18	0.224118	1.1388	0.303419	0.509041
H2O2_CSBDIFF_C2	Control	21	0.203776	1.13355	0.290722	0.515962
ABBUD_LIF_DN	Control	16	0.239732	1.13196	0.287212	0.516842
HSA00260_GLYCINE_SERINE_AND_THREONINE_METABOLISM	Control	29	0.173819	1.13171	0.280164	0.51542
FLOTHO_CASP8AP2_MRD_DIFF	Control	49	0.135633	1.13069	0.274809	0.515303
TPA_RESIST_LATE_UP	Control	22	0.201607	1.1282	0.293033	0.517723
IL6_SCAR_FIBRO_UP	Control	16	0.226977	1.12805	0.303226	0.516198
HUMAN_TISSUE_PANCREAS	Control	23	0.194848	1.12505	0.29065	0.519298
IDX_TSA_DN_CLUSTER2	Control	42	0.148794	1.12505	0.270325	0.51752
WANG_HOXA9_VS_MEIS1_DN	Control	16	0.232775	1.11893	0.289157	0.526473
XPB_TTD-CS_DN	Control	18	0.221764	1.11498	0.303983	0.531668
UV-CMV_UNIQUE_HCMV_6HRS_DN	Control	51	0.130966	1.11424	0.297456	0.531059
PLATELET_EXPRESSED	Control	20	0.208801	1.11394	0.314991	0.529783
HSA04514_CELL_ADHESION_MOLECULES	Control	71	0.112174	1.11372	0.303213	0.528337
ADIP_HUMAN_UP	Control	47	0.138492	1.11288	0.321041	0.527868
ROSS_CBF	Control	49	0.13396	1.11106	0.326	0.529267
TAKEDA_NUP8_HOXA9_8D_DN	Control	127	0.0847987	1.1084	0.336066	0.53208
TPA_RESIST_MIDDLE_DN	Control	82	0.104726	1.10799	0.346228	0.530939
TARTE_PC	Control	46	0.136959	1.10364	0.324272	0.53653
AGUIRRE_PANCREAS_CHR17	Control	42	0.142565	1.10112	0.310345	0.539058
TPA_SENS_LATE_DN	Control	156	0.0759159	1.09676	0.325253	0.544753
NO1PATHWAY	Control	20	0.206614	1.09633	0.348315	0.543678
GALACTOSE_METABOLISM	Control	18	0.214189	1.0935	0.320675	0.546579
CARIES_PULP_DN	Control	55	0.124566	1.09318	0.317308	0.545335
ICHIBA_GVHD	Control	145	0.0769034	1.08894	0.327381	0.550807
HSIAO_LIVER_SPECIFIC_GENES	Control	157	0.0753626	1.08867	0.349901	0.549471
RETT_UP	Control	32	0.160782	1.08174	0.325301	0.559586
LEE_CIP_DN	Control	42	0.141578	1.07797	0.351406	0.564476
NAKAJIMA_MCS_UP	Control	54	0.125984	1.07598	0.353783	0.566259
HUMAN_TISSUE_TESTIS	Control	40	0.143197	1.07303	0.353846	0.569581
DIAB_NEPH_UP	Control	41	0.138761	1.06954	0.35443	0.573897
ASTON_DEPRESSION_DN	Control	94	0.0926467	1.06821	0.362264	0.574295
HEARTFAILURE_ATRIA_DN	Control	83	0.10025	1.06726	0.34542	0.574188
MAGRANGEAS_MULTIPLE_MYELOMA_IGL_VS_IGK_DN	Control	15	0.226128	1.06674	0.366599	0.573341
GENOTOXINS_ALL_4HRS_REG	Control	19	0.201546	1.06207	0.379242	0.579879
O6BG_RESIST_MEDULLOBLASTOMA_UP	Control	15	0.235149	1.06075	0.348425	0.580451
N_GLYCAN_BIOSYNTHESIS	Control	18	0.208295	1.05905	0.355599	0.581776
HDACI_COLON_TSA48HRS_UP	Control	28	0.165545	1.05888	0.366733	0.580252
EGF_HDMEC_UP	Control	29	0.165336	1.05204	0.368952	0.590727
POD1_KO_MOST_UP	Control	25	0.17524	1.04749	0.406814	0.597036
CMV_HCMV_TIMECOURSE_18HRS_UP	Control	49	0.126813	1.04422	0.408907	0.601015
PARK_MSCS_DIFF	Control	20	0.19592	1.04355	0.376033	0.600435
HEARTFAILURE_ATRIA_UP	Control	15	0.229487	1.04099	0.397059	0.603
KNUDSEN_PMNS_DN	Control	148	0.0729191	1.03717	0.393829	0.608047
DAC_PANC_UP	Control	209	0.0599282	1.03631	0.384314	0.607752
CORTEX_ENRICHMENT_LATE_UP	Control	15	0.2181	1.03149	0.396518	0.614729
ALZHEIMERS_INCIPIENT_UP	Control	218	0.0611347	1.03031	0.388211	0.615001
HOFFMANN_BIVSBII_BI	Control	67	0.107806	1.02978	0.397287	0.614099
AMINOACYL_TRNA_BIOSYNTHESIS	Control	19	0.194863	1.02274	0.405825	0.625216
UVC_TTD_4HR_UP	Control	30	0.15661	1.02142	0.411392	0.625795
HSA02010_ABC_TRANSPORTERS_GENERAL	Control	31	0.156344	1.02117	0.427221	0.624361
ASTON_DEPRESSION_UP	Control	27	0.166414	1.02074	0.390151	0.623286
GN_CAMP_GRANULOSA_DN	Control	42	0.13193	1.01849	0.410359	0.625511
MRNA_PROCESSING	Control	33	0.149393	1.01742	0.433712	0.62553
CELL_ADHESION	Control	101	0.0886612	1.01648	0.409543	0.625397
ZMPSTE24_KO_DN	Control	23	0.180318	1.00947	0.440239	0.636444
HSA00271_METHIONINE_METABOLISM	Control	16	0.209268	1.00566	0.448898	0.641526
BASSO_GERMINAL_CENTER_CD40_DN	Control	43	0.129275	1.0035	0.456349	0.643567
GH_EXOGENOUS_EARLY_UP	Control	16	0.208408	0.999118	0.436475	0.649724
DORSAM_HOXA9_DN	Control	23	0.173417	0.998223	0.443798	0.649491
ZHAN_MM_CD138_CD2_VS_REST	Control	26	0.164896	0.998222	0.440171	0.647603
FATTY_ACID_DEGRADATION	Control	16	0.204681	0.996408	0.446502	0.649157
LVAD_HEARTFAILURE_DN	Control	28	0.158397	0.994466	0.441423	0.650911
CMV_HCMV_TIMECOURSE_20HRS_DN	Control	25	0.166627	0.992264	0.456612	0.653041
HSA00590_ARACHIDONIC_ACID_METABOLISM	Control	22	0.174709	0.989965	0.419483	0.655329
TAKEDA_NUP8_HOXA9_10D_DN	Control	82	0.0914226	0.986561	0.441113	0.659693
ROSS_PML_RAR	Control	53	0.115177	0.984851	0.462745	0.660939
WERNERONLY_FIBRO_UP	Control	23	0.167137	0.983999	0.452906	0.660634
CORDERO_KRAS_KD_VS_CONTROL_UP	Control	53	0.114162	0.983857	0.446247	0.658986
HPV31_UP	Control	33	0.14603	0.983675	0.459514	0.657408
BCNU_GLIOMA_NOMGMT_48HRS_DN	Control	17	0.199507	0.982121	0.488518	0.658479
LEE_ACOX1_DN	Control	48	0.122479	0.979301	0.459615	0.661775
PASSERINI_SIGNAL	Control	240	0.0545862	0.974316	0.460348	0.668757
BRG1_ALAB_DN	Control	29	0.152305	0.972329	0.473795	0.670561
HDACI_COLON_CLUSTER6	Control	32	0.143766	0.965779	0.480652	0.680859
IL6_FIBRO_UP	Control	27	0.155441	0.965438	0.510891	0.679632
PYRIMIDINE_METABOLISM	Control	42	0.12569	0.96116	0.486922	0.685787
LOTEM_LEUKEMIA_UP	Control	16	0.193566	0.956434	0.512381	0.692614
HDACI_COLON_CLUSTER10	Control	24	0.163777	0.953248	0.517895	0.696488
TARTE_MATURE_PC	Control	221	0.0565568	0.950387	0.491701	0.69999
HADDAD_HSC_CD10_UP	Control	166	0.0629647	0.950317	0.485477	0.69818
WALKER_MM_SNP_DIFF	Control	30	0.147894	0.949255	0.5	0.698311
CHESLER_BRAIN_NEURAL_HIGH_GENES	Control	17	0.193278	0.942583	0.512428	0.708526
LINDSTEDT_DEND_DN	Control	39	0.125641	0.942531	0.514113	0.706692
TSADAC_PANC50_UP	Control	17	0.188067	0.942076	0.514056	0.705656
GAMMA_ESR_WS_UNREG	Control	19	0.173347	0.940114	0.513347	0.707349
ET743_HELA_UP	Control	39	0.123702	0.940054	0.519192	0.705573
MOUSE_TISSUE_TESTIS	Control	16	0.197629	0.939025	0.527668	0.705453
LINDSTEDT_DEND_8H_VS_48H_DN	Control	49	0.112216	0.938674	0.534615	0.70426
CAMPTOTHECIN_PROBCELL_UP	Control	16	0.193566	0.933016	0.51357	0.712787
BECKER_TAMOXIFEN_RESISTANT_DN	Control	37	0.128517	0.928723	0.563786	0.718895
HOFMANN_MDS_CD34_HIGH_RISK	Control	17	0.187371	0.924707	0.523256	0.724582
NAKAJIMA_MCSMBP_MAST	Control	31	0.137129	0.920891	0.570526	0.729708
TYROSINE_METABOLISM	Control	22	0.165866	0.918294	0.550201	0.732456
PASSERINI_GROWTH	Control	30	0.139626	0.918143	0.568826	0.730795
GLYCOSPHINGOLIPID_METABOLISM	Control	16	0.189682	0.911199	0.565041	0.741708
CELL_GROWTH_AND_OR_MAINTENANCE	Control	45	0.114147	0.908819	0.554286	0.74414
CMV_HCMV_TIMECOURSE_16HRS_DN	Control	16	0.188571	0.907334	0.552581	0.744966
ALCALAY_AML_NPMC_UP	Control	89	0.0821792	0.904467	0.557613	0.748353
TAKEDA_NUP8_HOXA9_6H_UP	Control	50	0.106807	0.901577	0.558499	0.751877
LEE_TCELLS4_UP	Control	23	0.160141	0.901318	0.576375	0.750383
HSA00561_GLYCEROLIPID_METABOLISM	Control	44	0.113896	0.899841	0.554672	0.751188
IGF_VS_PDGF_UP	Control	50	0.107035	0.899163	0.569416	0.750463
IDX_TSA_DN_CLUSTER1	Control	28	0.14059	0.898664	0.578495	0.749401
CALRES_MOUSE_UP	Control	18	0.172434	0.898346	0.567164	0.74803
TAVOR_CEBP_DN	Control	17	0.177727	0.897623	0.580042	0.747371
HSA05217_BASAL_CELL_CARCINOMA	Control	48	0.107201	0.890164	0.619342	0.75933
HSA04742_TASTE_TRANSDUCTION	Control	18	0.169076	0.888707	0.576772	0.759955
AGED_MOUSE_CEREBELLUM_UP	Control	39	0.121036	0.883909	0.592	0.766703
HPV31_DN	Control	27	0.141158	0.882479	0.612	0.767422
KLEIN_PEL_DN	Control	29	0.138282	0.87972	0.614662	0.770552
HSC_LTHSC_ADULT	Control	234	0.0517376	0.879378	0.59841	0.769207
PPARAPATHWAY	Control	38	0.120506	0.877406	0.592233	0.770833
AGED_MOUSE_HIPPOCAMPUS_ANY_DN	Control	35	0.121611	0.873697	0.619433	0.775702
FRUCTOSE_AND_MANNOSE_METABOLISM	Control	16	0.180928	0.873424	0.6139	0.774192
ADIP_VS_FIBRO_UP	Control	24	0.148429	0.873187	0.614073	0.772645
CITED1_KO_HET_UP	Control	19	0.165309	0.872157	0.603448	0.77256
CREB_BRAIN_8WKS_DN	Control	31	0.132507	0.870449	0.599182	0.773757
CMV_24HRS_DN	Control	48	0.108603	0.868517	0.601253	0.775522
HSA04360_AXON_GUIDANCE	Control	96	0.0754542	0.864484	0.644351	0.78076
TPA_SENS_EARLY_DN	Control	184	0.0548565	0.861166	0.636364	0.784483
GILDEA_BLADDER_UP	Control	18	0.166782	0.860334	0.678138	0.784111
TAKEDA_NUP8_HOXA9_8D_UP	Control	86	0.0800458	0.859048	0.616412	0.784555
GLYCINE_SERINE_AND_THREONINE_METABOLISM	Control	24	0.149289	0.858965	0.613497	0.782754
BRENTANI_TRANSPORT_OF_VESICLES	Control	15	0.183759	0.854638	0.623047	0.788503
S1P_SIGNALING	Control	15	0.183061	0.849356	0.64086	0.796001
TAKEDA_NUP8_HOXA9_10D_UP	Control	108	0.0683404	0.847846	0.660377	0.796867
ZHAN_MMPC_SIMAL	Control	29	0.131301	0.844983	0.644309	0.800042
CMV_HCMV_TIMECOURSE_48HRS_DN	Control	79	0.081049	0.84478	0.630435	0.798391
H2O2_CSBRESCUED_C1_UP	Control	28	0.134159	0.84089	0.644	0.803082
AGED_RHESUS_UP	Control	134	0.062544	0.837866	0.683267	0.80618
TAKEDA_NUP8_HOXA9_16D_UP	Control	94	0.0758215	0.834415	0.685714	0.810111
CHIARETTI_ZAP70_DIFF	Control	39	0.113551	0.833877	0.657534	0.809063
GPCRPATHWAY	Control	22	0.15138	0.833262	0.650505	0.808122
WERNER_FIBRO_UP	Control	39	0.113363	0.830991	0.66736	0.810109
TGF_BETA_SIGNALING_PATHWAY	Control	38	0.11504	0.82879	0.666667	0.811882
HSA04920_ADIPOCYTOKINE_SIGNALING_PATHWAY	Control	52	0.0981039	0.826399	0.671937	0.814011
IDX_TSA_DN_CLUSTER6	Control	18	0.159701	0.825673	0.690702	0.813309
MYOD_BRG1_UP	Control	23	0.141301	0.825237	0.678423	0.812159
CALRES_MOUSE_NEOCORTEX_UP	Control	40	0.108356	0.823706	0.644033	0.81276
LEE_DENA_UP	Control	44	0.103122	0.817136	0.719231	0.822084
ZHAN_MM_CD138_MF_VS_REST	Control	28	0.126247	0.813012	0.691057	0.827329
HSA00760_NICOTINATE_AND_NICOTINAMIDE_METABOLISM	Control	16	0.170978	0.810546	0.692748	0.829599
HSC_HSC_SHARED	Control	146	0.0576049	0.809278	0.726721	0.82984
BREAST_CANCER_ESTROGEN_SIGNALING	Control	66	0.0836489	0.807122	0.708015	0.831446
LEE_MYC_TGFA_DN	Control	48	0.0991316	0.799667	0.699411	0.841889
BRG1_SW13_UP	Control	30	0.12307	0.797611	0.708	0.843314
CROONQUIST_IL6_RAS_DN	Control	15	0.169792	0.79617	0.704331	0.843797
HDACI_COLON_BUT48HRS_UP	Control	56	0.091061	0.795963	0.722441	0.842179
GH_EXOGENOUS_LATE_DN	Control	51	0.0948168	0.792795	0.70751	0.845531
CALRES_RHESUS_UP	Control	46	0.0959045	0.792278	0.750499	0.844425
HIPPOCAMPUS_DEVELOPMENT_PRENATAL	Control	20	0.150724	0.786356	0.729622	0.851927
HSA00565_ETHER_LIPID_METABOLISM	Control	23	0.1375	0.785324	0.727642	0.851617
HSA00350_TYROSINE_METABOLISM	Control	41	0.104616	0.78513	0.750499	0.84994
TCELL_ANERGIC_UP	Control	51	0.0936107	0.78146	0.75717	0.853877
YU_CMYC_DN	Control	24	0.129354	0.769248	0.742972	0.871431
HSA00910_NITROGEN_METABOLISM	Control	16	0.160759	0.764786	0.760081	0.876291
GAMMA-UV_FIBRO_DN	Control	31	0.115942	0.76447	0.762397	0.874813
VIPPATHWAY	Control	17	0.152878	0.759911	0.781544	0.880208
GLYCEROLIPID_METABOLISM	Control	33	0.112581	0.759849	0.775468	0.878324
STRIATED_MUSCLE_CONTRACTION	Control	26	0.125157	0.75878	0.742126	0.878083
LEE_E2F1_UP	Control	40	0.101156	0.75784	0.795635	0.87762
CMV_8HRS_DN	Control	32	0.108194	0.755824	0.796371	0.87878
HSA00600_SPHINGOLIPID_METABOLISM	Control	32	0.113545	0.755243	0.800395	0.877752
UV_UNIQUE_FIBRO_DN	Control	18	0.150453	0.754947	0.777996	0.876245
BRUNO_IL3_DN	Control	49	0.0885742	0.749987	0.762575	0.881927
STAEGE_EFTS_UP	Control	19	0.143446	0.749309	0.781513	0.880911
HISTIDINE_METABOLISM	Control	18	0.142611	0.745104	0.779167	0.885163
HSA04510_FOCAL_ADHESION	Control	157	0.0510763	0.744419	0.799242	0.884179
CMV_HCMV_TIMECOURSE_1HR_DN	Control	24	0.127492	0.738313	0.798687	0.891263
SHEPARD_BMYB_MORPHOLINO_DN	Control	114	0.0592468	0.735373	0.818898	0.893479
CMV_ALL_DN	Control	72	0.0738885	0.733181	0.816495	0.894801
WONG_IFNA_HCC_RESISTANT_VS_SENSITIVE_DN	Control	23	0.127501	0.730947	0.843299	0.896
OXSTRESS_RPE_HNETBH_DN	Control	31	0.109758	0.729764	0.800395	0.895656
HSA04612_ANTIGEN_PROCESSING_AND_PRESENTATION	Control	21	0.133146	0.729138	0.820663	0.894561
HSA00360_PHENYLALANINE_METABOLISM	Control	21	0.130981	0.7274	0.792261	0.894992
ST_INTEGRIN_SIGNALING_PATHWAY	Control	62	0.0773451	0.724399	0.821862	0.897177
GH_EXOGENOUS_ALL_UP	Control	35	0.0992186	0.721651	0.843943	0.898962
IL2PATHWAY	Control	15	0.151305	0.704688	0.845401	0.919516
ST_INTERLEUKIN_4_PATHWAY	Control	21	0.12841	0.702595	0.838966	0.920271
IGF_VS_PDGF_DN	Control	31	0.105466	0.698558	0.836777	0.923475
LEE_MYC_DN	Control	47	0.0859531	0.694665	0.851927	0.926362
CHAUVIN_ANDROGEN_REGULATED_GENES	Control	29	0.107187	0.69358	0.853175	0.925691
REFRACTORY_GASTRIC_UP	Control	49	0.0823365	0.690192	0.842315	0.927945
HADDAD_HPCLYMPHO_ENRICHED	Control	176	0.045235	0.687314	0.864097	0.929673
BIOPEPTIDESPATHWAY	Control	26	0.112891	0.68688	0.829026	0.928168
BCRABL_HL60_CDNA_DN	Control	19	0.127375	0.682622	0.871032	0.931291
DFOSB_BRAIN_8WKS_UP	Control	34	0.0980955	0.679194	0.842424	0.933333
TENEDINI_MEGAKARYOCYTIC_GENES	Control	33	0.0988296	0.672487	0.893617	0.939113
PARK_RARALPHA_MOD	Control	40	0.0890591	0.672369	0.85041	0.937275
AS3_FIBRO_C2	Control	19	0.126194	0.667006	0.880392	0.94134
AGED_MOUSE_NEOCORTEX_DN	Control	33	0.0986686	0.666945	0.872165	0.939431
AS3_FIBRO_C1	Control	19	0.126194	0.66557	0.90099	0.939023
HDACI_COLON_SUL12HRS_DN	Control	21	0.120769	0.664346	0.881423	0.938428
HSA00220_UREA_CYCLE_AND_METABOLISM_OF_AMINO_GROUPS	Control	18	0.127006	0.656325	0.889098	0.945128
OXSTRESS_RPE_H2O2TBH_DN	Control	19	0.126194	0.653173	0.892787	0.946539
XU_CBP_DN	Control	25	0.106217	0.648899	0.891429	0.948864
SCHRAETS_MLL_UP	Control	25	0.109299	0.64493	0.903353	0.951031
ADIP_VS_PREADIP_UP	Control	25	0.1068	0.640613	0.924152	0.95346
UVC_LOW_C2_DN	Control	15	0.135455	0.634262	0.908023	0.957706
HINATA_NFKB_UP	Control	66	0.0665551	0.630544	0.930526	0.95928
GAY_YY1_UP	Control	143	0.0449644	0.619323	0.926295	0.967021
NITROGEN_METABOLISM	Control	15	0.132239	0.616468	0.926625	0.967485
HSA00252_ALANINE_AND_ASPARTATE_METABOLISM	Control	24	0.106938	0.61531	0.922131	0.966476
DAVIES_MGUS_MM	Control	23	0.106575	0.602955	0.931452	0.974553
LEE_TCELLS9_UP	Control	18	0.114015	0.600105	0.937143	0.97477
DRUG_RESISTANCE_AND_METABOLISM	Control	66	0.0626781	0.594991	0.947955	0.976477
KANG_TERT_DN	Control	75	0.0582532	0.59435	0.944334	0.974941
HSA04530_TIGHT_JUNCTION	Control	94	0.0514592	0.582461	0.961066	0.981023
UVB_NHEK4_6HRS_UP	Control	16	0.121035	0.581795	0.953908	0.97949
NAB_LUNG_DN	Control	35	0.0819695	0.577278	0.959615	0.980349
UVB_NHEK1_C6	Control	93	0.050961	0.574634	0.970894	0.980031
HSA00051_FRUCTOSE_AND_MANNOSE_METABOLISM	Control	28	0.0891948	0.571394	0.944773	0.979997
CSKPATHWAY	Control	15	0.12145	0.565517	0.942574	0.981261
AMIPATHWAY	Control	15	0.12145	0.565454	0.959677	0.979323
CARM_ERPATHWAY	Control	18	0.110422	0.561211	0.971311	0.979535
HSA04670_LEUKOCYTE_TRANSENDOTHELIAL_MIGRATION	Control	81	0.0538895	0.560762	0.961847	0.977788
SHEPARD_GENES_COMMON_BW_CB_MO	Control	44	0.0653676	0.515961	0.984127	0.994394
OLDWERNER_FIBRO_UP	Control	16	0.10355	0.4947	0.992352	0.998256
FLECHNER_KIDNEY_TRANSPLANT_REJECTION_UP	Control	41	0.0641649	0.473941	0.991525	1
AGED_MOUSE_RETINA_ANY_UP	Control	17	0.0934219	0.458904	0.992352	1
ZHAN_MM_CD138_HP_VS_REST	Control	24	0.0773178	0.448759	0.995763	0.999093
TSA_PANC50_UP	Control	26	0.0671649	0.415401	1	0.999109
PENG_GLUTAMINE_DN	Forskolin	166	-0.350421	-5.24461	0	0
PENG_RAPAMYCIN_DN	Forskolin	139	-0.359304	-4.99173	0	0
PENG_LEUCINE_DN	Forskolin	109	-0.350512	-4.29858	0	0
CHANG_SERUM_RESPONSE_UP	Forskolin	104	-0.34273	-4.11453	0	0
TARTE_PLASMA_BLASTIC	Forskolin	215	-0.211919	-3.65455	0	0
BAF57_BT549_DN	Forskolin	218	-0.210635	-3.59408	0	0
SERUM_FIBROBLAST_CORE_UP	Forskolin	138	-0.256503	-3.53379	0	0
REOVIRUS_HEK293_UP	Forskolin	165	-0.232911	-3.53249	0	0
ET743_SARCOMA_DN	Forskolin	198	-0.21736	-3.53054	0	0
RCC_NL_UP	Forskolin	382	-0.154348	-3.50562	0	0
MYC_ONCOGENIC_SIGNATURE	Forskolin	121	-0.270377	-3.45997	0	0
CMV_24HRS_UP	Forskolin	40	-0.404062	-3.03899	0	0.000102
CMV_ALL_UP	Forskolin	52	-0.356154	-3.029	0	9.42e-05
CHEN_HOXA5_TARGETS_UP	Forskolin	143	-0.21846	-3.02345	0	8.75e-05
ET743_SARCOMA_48HRS_DN	Forskolin	141	-0.217612	-3.01083	0	8.17e-05
IFN_GAMMA_UP	Forskolin	20	-0.559206	-3.00506	0	7.66e-05
UVB_NHEK3_ALL	Forskolin	281	-0.156523	-2.97786	0	7.21e-05
BASSO_REGULATORY_HUBS	Forskolin	96	-0.262201	-2.9478	0	6.81e-05
HSA00100_BIOSYNTHESIS_OF_STEROIDS	Forskolin	15	-0.61465	-2.9342	0	6.45e-05
STEMCELL_COMMON_UP	Forskolin	132	-0.217628	-2.90277	0	0.000118
SCHUMACHER_MYC_UP	Forskolin	38	-0.399315	-2.87202	0	0.000166
LI_FETAL_VS_WT_KIDNEY_DN	Forskolin	112	-0.227628	-2.83622	0	0.000211
LINDSTEDT_DEND_UP	Forskolin	39	-0.376964	-2.80772	0	0.000252
HSA04115_P53_SIGNALING_PATHWAY	Forskolin	46	-0.341303	-2.76623	0	0.000293
ET743_SARCOMA_72HRS_DN	Forskolin	161	-0.184584	-2.7607	0	0.000281
IFN_ANY_UP	Forskolin	45	-0.342843	-2.76047	0	0.00027
BLEO_HUMAN_LYMPH_HIGH_24HRS_UP	Forskolin	63	-0.291494	-2.75071	0	0.00026
HSC_EARLYPROGENITORS_FETAL	Forskolin	299	-0.137959	-2.7437	0	0.000293
HSC_EARLYPROGENITORS_SHARED	Forskolin	299	-0.137959	-2.73485	0	0.000325
HSC_LATEPROGENITORS_FETAL	Forskolin	322	-0.128784	-2.73134	0	0.000388
MANALO_HYPOXIA_DN	Forskolin	57	-0.31376	-2.72509	0	0.000412
HSC_EARLYPROGENITORS_ADULT	Forskolin	301	-0.135185	-2.71655	0	0.000436
BLEO_MOUSE_LYMPH_HIGH_24HRS_DN	Forskolin	27	-0.440369	-2.70968	0	0.000423
CMV_HCMV_TIMECOURSE_ALL_UP	Forskolin	304	-0.136676	-2.69803	0	0.000514
HSA04620_TOLL_LIKE_RECEPTOR_SIGNALING_PATHWAY	Forskolin	65	-0.275831	-2.67773	0	0.000666
UV-4NQO_FIBRO_UP	Forskolin	18	-0.514103	-2.6622	0	0.000776
HDACI_COLON_SUL_UP	Forskolin	85	-0.243649	-2.63747	0	0.00106606
GH_GHRHR_KO_24HRS_DN	Forskolin	134	-0.198975	-2.62588	0	0.00106872
GENOTOXINS_24HRS_DISCR	Forskolin	23	-0.460463	-2.6166	0	0.00109984
DNA_DAMAGE_SIGNALING	Forskolin	55	-0.30428	-2.60272	0	0.00113366
HSC_LATEPROGENITORS_ADULT	Forskolin	321	-0.124679	-2.59914	0	0.00116157
HSC_LATEPROGENITORS_SHARED	Forskolin	317	-0.126483	-2.59155	0	0.00116062
RADIATION_SENSITIVITY	Forskolin	20	-0.485595	-2.58811	0	0.00124185
AD12_ANY_DN	Forskolin	15	-0.551926	-2.57419	0	0.00139669
G1_TO_S_CELL_CYCLE_REACTOME	Forskolin	48	-0.320451	-2.56292	0	0.00157409
IFN_BETA_UP	Forskolin	38	-0.342957	-2.549	0	0.00174134
UVB_NHEK3_C0	Forskolin	55	-0.288531	-2.53816	0.002079	0.00192151
CMV_HCMV_TIMECOURSE_14HRS_UP	Forskolin	33	-0.374251	-2.53413	0	0.00192834
CELL_CYCLE_CHECKPOINT	Forskolin	19	-0.477473	-2.5004	0	0.0025011
ALZHEIMERS_INCIPIENT_DN	Forskolin	108	-0.204337	-2.49537	0	0.00245107
RAS_ONCOGENIC_SIGNATURE	Forskolin	159	-0.167727	-2.46798	0	0.00312862
SHEPARD_CRASH_AND_BURN_MUT_VS_WT_UP	Forskolin	95	-0.212848	-2.46156	0.00195312	0.00318248
SANSOM_APC_LOSS5_UP	Forskolin	59	-0.270542	-2.45039	0	0.00349309
RNA_TRANSCRIPTION_REACTOME	Forskolin	28	-0.392839	-2.44639	0	0.00347124
CELL_CYCLE_KEGG	Forskolin	62	-0.266729	-2.43453	0	0.00362058
CELL_CYCLE	Forskolin	54	-0.27857	-2.43134	0	0.00359727
MOREAUX_TACI_HI_VS_LOW_DN	Forskolin	119	-0.193399	-2.42578	0	0.00367631
PGC	Forskolin	228	-0.139463	-2.41657	0	0.00391232
BRENTANI_DEATH	Forskolin	48	-0.291277	-2.40864	0	0.00404032
BRENTANI_CELL_CYCLE	Forskolin	58	-0.266445	-2.40647	0	0.00404943
DNMT1_KO_UP	Forskolin	52	-0.279936	-2.3716	0	0.00504852
DER_IFNG_UP	Forskolin	31	-0.357586	-2.3701	0.0020284	0.00502485
GPCRDB_CLASS_A_RHODOPSIN_LIKE	Forskolin	113	-0.193949	-2.36913	0	0.00501921
HUMAN_MITODB_6_2002	Forskolin	268	-0.128015	-2.33902	0	0.00622562
UEDA_MOUSE_LIVER	Forskolin	98	-0.199802	-2.31929	0	0.00700499
HSA04664_FC_EPSILON_RI_SIGNALING_PATHWAY	Forskolin	52	-0.269412	-2.31591	0	0.00716213
EIF4PATHWAY	Forskolin	16	-0.477107	-2.3115	0	0.00722897
HIVNEFPATHWAY	Forskolin	45	-0.296316	-2.30297	0	0.00754684
HSA03050_PROTEASOME	Forskolin	19	-0.434218	-2.30065	0	0.00750455
CMV_IE86_UP	Forskolin	41	-0.301915	-2.29958	0.00604839	0.00739734
DER_IFNB_UP	Forskolin	51	-0.267689	-2.29652	0	0.00750601
HSA04060_CYTOKINE_CYTOKINE_RECEPTOR_INTERACTION	Forskolin	130	-0.171933	-2.28569	0	0.00805122
UVC_HIGH_ALL_DN	Forskolin	213	-0.133706	-2.28551	0	0.00794092
BRCA1_OVEREXP_DN	Forskolin	69	-0.238916	-2.27994	0	0.0081778
VEGFPATHWAY	Forskolin	21	-0.410112	-2.27826	0.00197628	0.00812895
JAIN_NEMO_DIFF	Forskolin	43	-0.297183	-2.27796	0	0.00802199
MYC_TARGETS	Forskolin	35	-0.331561	-2.27726	0.00194553	0.00797731
HYPOXIA_RCC_UP	Forskolin	55	-0.259458	-2.25743	0	0.0090059
P53_SIGNALING	Forskolin	60	-0.245743	-2.25643	0.00206186	0.00895112
IFN_ALPHA_UP	Forskolin	21	-0.411956	-2.25226	0.00382409	0.00907021
APOPTOSIS	Forskolin	46	-0.280505	-2.23868	0.00188679	0.00980085
PARP_KO_UP	Forskolin	25	-0.365029	-2.21174	0.00206186	0.0115643
BRENTANI_REPAIR	Forskolin	31	-0.327854	-2.19134	0.006	0.0128588
HSA04110_CELL_CYCLE	Forskolin	81	-0.204605	-2.17792	0.00196078	0.0136932
MOREAUX_TACI_HI_IN_PPC_UP	Forskolin	45	-0.266975	-2.14815	0.0020202	0.0162136
INSULIN_SIGNALING	Forskolin	62	-0.233746	-2.14765	0	0.0161194
IDX_TSA_UP_CLUSTER5	Forskolin	72	-0.219254	-2.14656	0	0.016145
UVB_NHEK3_C1	Forskolin	38	-0.285635	-2.14598	0	0.0159875
GPCRS_CLASS_A_RHODOPSIN_LIKE	Forskolin	93	-0.18894	-2.13687	0.0021322	0.0168653
HSA04210_APOPTOSIS	Forskolin	59	-0.236826	-2.13637	0	0.016704
GAY_YY1_DN	Forskolin	178	-0.13671	-2.12609	0	0.0174879
HSA05218_MELANOMA	Forskolin	59	-0.236847	-2.12527	0	0.0173744
UVB_SCC_DN	Forskolin	73	-0.211996	-2.12523	0	0.0171875
PENG_GLUCOSE_DN	Forskolin	89	-0.193138	-2.1166	0	0.0179738
SMITH_HTERT_UP	Forskolin	70	-0.218065	-2.11399	0	0.0180545
UVC_XPCS_ALL_DN	Forskolin	371	-0.0984787	-2.11329	0.00412371	0.0178782
MAPKPATHWAY	Forskolin	58	-0.23704	-2.09389	0.00188679	0.019944
HSA04940_TYPE_I_DIABETES_MELLITUS	Forskolin	18	-0.399957	-2.07055	0	0.0229607
SMITH_HCV_INDUCED_HCC_UP	Forskolin	25	-0.342625	-2.07023	0.00642398	0.0227637
HSA05215_PROSTATE_CANCER	Forskolin	70	-0.208421	-2.06713	0.00558659	0.0230442
GH_GHRHR_KO_6HRS_DN	Forskolin	23	-0.360869	-2.0622	0.00587084	0.023538
DER_IFNA_UP	Forskolin	33	-0.301628	-2.05507	0.00206186	0.0243648
PROTEASOME_DEGRADATION	Forskolin	21	-0.378197	-2.0282	0.00204499	0.0286786
ATMPATHWAY	Forskolin	16	-0.423711	-2.02422	0	0.0291014
ET743_SARCOMA_24HRS_DN	Forskolin	81	-0.189552	-2.02394	0.00390625	0.0288572
HSC_MATURE_FETAL	Forskolin	228	-0.117001	-2.02346	0.00608519	0.0286817
UVC_XPCS_8HR_DN	Forskolin	317	-0.100369	-2.01879	0	0.0292106
WNT_SIGNALING	Forskolin	48	-0.241061	-2.0177	0.00198807	0.0291629
INSULIN_ADIP_INSENS_UP	Forskolin	17	-0.399262	-2.01545	0.00574713	0.0292894
SHEPARD_BMYB_MORPHOLINO_UP	Forskolin	110	-0.162003	-2.00943	0.00369686	0.0301165
OXSTRESS_BREASTCA_UP	Forskolin	19	-0.37813	-2.00658	0.00414938	0.0303564
OLDWERNER_FIBRO_DN	Forskolin	67	-0.204319	-1.99964	0.006	0.0313287
KERATINOCYTEPATHWAY	Forskolin	31	-0.292237	-1.99545	0.00185874	0.0319123
UVC_TTD-XPCS_COMMON_DN	Forskolin	114	-0.155777	-1.99468	0.00390625	0.0318149
PEPTIDE_GPCRS	Forskolin	49	-0.244498	-1.98766	0.00393701	0.0326949
ST_TUMOR_NECROSIS_FACTOR_PATHWAY	Forskolin	19	-0.374911	-1.97939	0	0.0339216
KIM_TH_CELLS_UP	Forskolin	33	-0.291454	-1.9792	0.00591716	0.033661
HSC_MATURE_ADULT	Forskolin	236	-0.112144	-1.9716	0.00408163	0.0351393
DNA_REPLICATION_REACTOME	Forskolin	31	-0.300403	-1.95143	0.00601202	0.0392253
TNFR1PATHWAY	Forskolin	26	-0.320557	-1.93785	0.00998004	0.042194
BRENTANI_SIGNALING	Forskolin	123	-0.149559	-1.93262	0.0104603	0.0430234
HSA04660_T_CELL_RECEPTOR_SIGNALING_PATHWAY	Forskolin	69	-0.201794	-1.93013	0.00763359	0.0432802
HESS_HOXAANMEIS1_DN	Forskolin	41	-0.250861	-1.91892	0.0190476	0.0460507
GPCRDB_CLASS_B_SECRETIN_LIKE	Forskolin	15	-0.406752	-1.91538	0.0144033	0.0467646
ELONGINA_KO_DN	Forskolin	124	-0.145577	-1.90657	0.00587084	0.0488121
AGUIRRE_PANCREAS_CHR12	Forskolin	28	-0.30396	-1.90235	0.00411523	0.0496207
HESS_HOXAANMEIS1_UP	Forskolin	41	-0.250861	-1.89873	0.0136187	0.0501612
BRCA1_OVEREXP_PROSTATE_UP	Forskolin	111	-0.15316	-1.89133	0.010917	0.0518366
APOPTOSIS_GENMAPP	Forskolin	33	-0.275376	-1.89022	0.0158103	0.0517482
GPCRS_CLASS_B_SECRETIN_LIKE	Forskolin	15	-0.406752	-1.8899	0.015625	0.0513858
SHEPARD_POS_REG_OF_CELL_PROLIFERATION	Forskolin	61	-0.205774	-1.88799	0.00195312	0.0516039
WERNER_FIBRO_DN	Forskolin	103	-0.154794	-1.88389	0.00399202	0.0524717
FLECHNER_KIDNEY_TRANSPLANT_WELL_PBL_DN	Forskolin	29	-0.291822	-1.88274	0.00616016	0.0524122
MRNA_PROCESSING_REACTOME	Forskolin	68	-0.196339	-1.88135	0.0135135	0.0524105
CELLCYCLEPATHWAY	Forskolin	16	-0.389533	-1.88113	0.0147679	0.0520557
BRCA_PROGNOSIS_NEG	Forskolin	73	-0.187695	-1.87944	0.0139721	0.05208
RACCYCDPATHWAY	Forskolin	17	-0.375003	-1.87717	0.00980392	0.0524463
BRCA_BRCA1_POS	Forskolin	67	-0.197733	-1.87407	0.008	0.0531202
HSA04010_MAPK_SIGNALING_PATHWAY	Forskolin	177	-0.123842	-1.87283	0.00203252	0.0531208
GAMMA-UV_FIBRO_UP	Forskolin	30	-0.281536	-1.86836	0.018	0.0539852
VERNELL_PRB_CLSTR1	Forskolin	50	-0.219669	-1.86821	0.00571429	0.0536424
GENOTOXINS_ALL_24HRS_REG	Forskolin	16	-0.391244	-1.86731	0.00612245	0.0535241
SERUM_FIBROBLAST_CELLCYCLE	Forskolin	95	-0.164718	-1.86643	0.0115607	0.0534577
HDACI_COLON_SUL24HRS_UP	Forskolin	45	-0.239499	-1.8648	0.0100402	0.0535918
TUMOR_SUPRESSOR	Forskolin	19	-0.348041	-1.85767	0.0106383	0.0554038
TRANSLATION_FACTORS	Forskolin	22	-0.331256	-1.85656	0.00626305	0.0552438
HSA04130_SNARE_INTERACTIONS_IN_VESICULAR_TRANSPORT	Forskolin	25	-0.308822	-1.85362	0.012474	0.0558465
CROMER_HYPOPHARYNGEAL_MET_VS_NON_UP	Forskolin	51	-0.223606	-1.85167	0.0105485	0.0559983
ST_JNK_MAPK_PATHWAY	Forskolin	33	-0.267212	-1.84253	0.012	0.0589369
MENSSEN_MYC_UP	Forskolin	23	-0.318875	-1.83724	0.0176471	0.0603128
IGF1PATHWAY	Forskolin	17	-0.358069	-1.83378	0.0105042	0.0610292
PEART_HISTONE_UP	Forskolin	38	-0.250449	-1.83327	0.018	0.0607947
HDACI_COLON_BUT48HRS_DN	Forskolin	83	-0.172211	-1.83219	0.0142566	0.0607053
GOLDRATH_CELLCYCLE	Forskolin	22	-0.328123	-1.83017	0.0181452	0.0609764
HSC_MATURE_SHARED	Forskolin	179	-0.117412	-1.82658	0.0138067	0.0617175
CMV_HCMV_TIMECOURSE_16HRS_UP	Forskolin	35	-0.265645	-1.82179	0.0159046	0.063004
HOFMANN_MDS_CD34_LOW_RISK	Forskolin	26	-0.295984	-1.81962	0.0125786	0.0632236
BROCKE_IL6	Forskolin	99	-0.151811	-1.81857	0.0157171	0.0631973
METPATHWAY	Forskolin	30	-0.279527	-1.81525	0.0172745	0.0641064
G1PATHWAY	Forskolin	20	-0.336166	-1.80642	0.0155642	0.0666671
ST_FAS_SIGNALING_PATHWAY	Forskolin	42	-0.234305	-1.80383	0.0142566	0.0672094
CHEMICALPATHWAY	Forskolin	16	-0.372827	-1.80189	0.0227704	0.0674739
HDACI_COLON_SUL48HRS_UP	Forskolin	57	-0.205886	-1.79965	0.0141129	0.0678257
FASPATHWAY	Forskolin	25	-0.303581	-1.79146	0.0204082	0.0704477
OLDAGE_DN	Forskolin	35	-0.262986	-1.78978	0.0211946	0.0706526
MTORPATHWAY	Forskolin	17	-0.366713	-1.78627	0.0183299	0.0715994
GLEEVECPATHWAY	Forskolin	18	-0.353307	-1.78191	0.0101215	0.0729291
DIAB_NEPH_DN	Forskolin	269	-0.0924399	-1.78004	0.00808081	0.0732925
SIG_CD40PATHWAYMAP	Forskolin	25	-0.292658	-1.77333	0.023301	0.0757655
CXCR4PATHWAY	Forskolin	15	-0.379334	-1.77235	0.0194805	0.0757118
IDX_TSA_UP_CLUSTER4	Forskolin	31	-0.267988	-1.76913	0.0189753	0.0766712
HSA00790_FOLATE_BIOSYNTHESIS	Forskolin	29	-0.270704	-1.76476	0.0192308	0.0780011
YU_CMYC_UP	Forskolin	28	-0.278353	-1.7588	0.0265306	0.0798813
LE_MYELIN_UP	Forskolin	70	-0.179334	-1.75798	0.0157791	0.0796871
HDACI_COLON_CUR48HRS_UP	Forskolin	46	-0.214181	-1.75589	0.0294118	0.0801195
MONOAMINE_GPCRS	Forskolin	26	-0.295015	-1.75284	0.0212355	0.0809672
GOLDRATH_HP	Forskolin	116	-0.140828	-1.75278	0.0207469	0.080523
INSULINPATHWAY	Forskolin	17	-0.358069	-1.74751	0.0212766	0.0821193
HSA04650_NATURAL_KILLER_CELL_MEDIATED_CYTOTOXICITY	Forskolin	56	-0.201738	-1.74433	0.0206612	0.0831417
KRETZSCHMAR_IL6_DIFF	Forskolin	99	-0.151811	-1.74112	0.0262097	0.0840691
AGUIRRE_PANCREAS_CHR8	Forskolin	38	-0.240007	-1.73654	0.0237624	0.0855289
UVB_NHEK3_C5	Forskolin	27	-0.276452	-1.73079	0.0248447	0.0875813
SIG_PIP3_SIGNALING_IN_CARDIAC_MYOCTES	Forskolin	51	-0.205765	-1.72776	0.0241449	0.0886615
GALE_FLT3ANDAPL_UP	Forskolin	35	-0.24879	-1.72688	0.0328185	0.0886154
NGUYEN_KERATO_DN	Forskolin	48	-0.213924	-1.72553	0.0130719	0.0888073
ZHAN_TONSIL_PCBC	Forskolin	33	-0.249884	-1.72361	0.0236559	0.0891341
VANTVEER_BREAST_OUTCOME_GOOD_VS_POOR_DN	Forskolin	49	-0.204485	-1.72107	0.0237624	0.0897939
STRESS_ARSENIC_SPECIFIC_UP	Forskolin	98	-0.147971	-1.71677	0.0294737	0.0913115
HSA03020_RNA_POLYMERASE	Forskolin	17	-0.341784	-1.71512	0.026694	0.0917305
IFNA_HCMV_6HRS_UP	Forskolin	24	-0.297888	-1.71462	0.0182556	0.0914358
HSA05216_THYROID_CANCER	Forskolin	25	-0.285646	-1.71454	0.0182927	0.0909992
HSA05120_EPITHELIAL_CELL_SIGNALING_IN_HELICOBACTER_PYLORI_INFECTION	Forskolin	55	-0.198772	-1.7118	0.022541	0.0917732
HOX_GENES	Forskolin	39	-0.226143	-1.70777	0.0328185	0.0930191
HDACI_COLON_CUR_UP	Forskolin	75	-0.173139	-1.70645	0.0200401	0.0931164
XU_CBP_UP	Forskolin	16	-0.353908	-1.69876	0.030303	0.0964545
AS3_FIBRO_DN	Forskolin	17	-0.331676	-1.69813	0.0378486	0.0962585
FLECHNER_KIDNEY_TRANSPLANT_REJECTION_PBL_UP	Forskolin	38	-0.232988	-1.69365	0.0368932	0.0980295
HOFFMANN_BIVSBII_BI_TABLE2	Forskolin	137	-0.128339	-1.69033	0.03125	0.0993637
HSA05219_BLADDER_CANCER	Forskolin	31	-0.253912	-1.69003	0.0255403	0.0990382
HDACI_COLON_CUR_DN	Forskolin	37	-0.231998	-1.68505	0.041502	0.10116
HSA05213_ENDOMETRIAL_CANCER	Forskolin	45	-0.208219	-1.68469	0.0265849	0.100869
LIN_WNT_UP	Forskolin	27	-0.270469	-1.68464	0.0297619	0.100399
HSA05211_RENAL_CELL_CARCINOMA	Forskolin	61	-0.183287	-1.68328	0.0245399	0.100684
FLECHNER_KIDNEY_TRANSPLANT_WELL_PBL_UP	Forskolin	97	-0.144745	-1.67941	0.0310078	0.102272
INOS_ALL_UP	Forskolin	36	-0.240941	-1.67726	0.0329218	0.102865
STRESS_GENOTOXIC_SPECIFIC_DN	Forskolin	25	-0.277237	-1.67709	0.0291262	0.102478
ST_GA13_PATHWAY	Forskolin	23	-0.294208	-1.66801	0.0258964	0.106672
SIG_INSULIN_RECEPTOR_PATHWAY_IN_CARDIAC_MYOCYTES	Forskolin	36	-0.242222	-1.66447	0.024	0.108001
HG_PROGERIA_DN	Forskolin	18	-0.324858	-1.66344	0.0264151	0.108043
MRNA_SPLICING	Forskolin	34	-0.246816	-1.6609	0.036	0.108941
IDX_TSA_DN_CLUSTER4	Forskolin	22	-0.293178	-1.66024	0.0307377	0.108777
UVC_HIGH_D3_DN	Forskolin	35	-0.235124	-1.6593	0.0314961	0.108808
ZHAN_MMPC_LATEVS	Forskolin	34	-0.237386	-1.64862	0.0387755	0.114234
UVC_XPCS_ALL_UP	Forskolin	36	-0.23075	-1.64811	0.0376569	0.113993
BRENTANI_PROTEIN_MODIFICATION	Forskolin	95	-0.145773	-1.64546	0.0218688	0.114857
CANCER_NEOPLASTIC_META_UP	Forskolin	45	-0.207751	-1.64444	0.0454545	0.114933
HSA05220_CHRONIC_MYELOID_LEUKEMIA	Forskolin	59	-0.17775	-1.64378	0.0273973	0.114831
ST_PHOSPHOINOSITIDE_3_KINASE_PATHWAY	Forskolin	24	-0.279023	-1.6414	0.03125	0.115483
NTHIPATHWAY	Forskolin	17	-0.328421	-1.6353	0.0462428	0.118466
MMS_MOUSE_LYMPH_HIGH_24HRS_UP	Forskolin	15	-0.348156	-1.63412	0.0511811	0.118597
EMT_DN	Forskolin	38	-0.219194	-1.63283	0.0379507	0.118829
ST_B_CELL_ANTIGEN_RECEPTOR	Forskolin	29	-0.262864	-1.6273	0.0417495	0.12165
HYPERTROPHY_MODEL	Forskolin	15	-0.358152	-1.62376	0.034188	0.123323
LIZUKA_G1_SM_G2	Forskolin	17	-0.323019	-1.62252	0.0359281	0.123621
IRS1_KO_ADIP_UP	Forskolin	68	-0.167861	-1.62159	0.038	0.123601
FETAL_LIVER_ENRICHED_TRANSCRIPTION_FACTORS	Forskolin	51	-0.192454	-1.62098	0.0400802	0.123389
HSA04662_B_CELL_RECEPTOR_SIGNALING_PATHWAY	Forskolin	44	-0.207753	-1.61908	0.0348361	0.124011
ARFPATHWAY	Forskolin	15	-0.351945	-1.61744	0.0494071	0.124471
BRCA1_OVEREXP_PROSTATE_DN	Forskolin	57	-0.180298	-1.61469	0.0520833	0.125536
GALINDO_ACT_UP	Forskolin	48	-0.195743	-1.6048	0.0383065	0.130978
HSA04950_MATURITY_ONSET_DIABETES_OF_THE_YOUNG	Forskolin	16	-0.331952	-1.60139	0.0389864	0.132608
ROME_INSULIN_2F_DN	Forskolin	15	-0.340802	-1.60012	0.0511247	0.132823
UVB_NHEK3_C2	Forskolin	32	-0.245069	-1.59708	0.0414079	0.134209
RADAEVA_IFNA_UP	Forskolin	22	-0.287011	-1.58699	0.0466019	0.140453
HSC_INTERMEDIATEPROGENITORS_SHARED	Forskolin	82	-0.148065	-1.58494	0.0327198	0.141205
HCC_SURVIVAL_GOOD_VS_POOR_DN	Forskolin	91	-0.141099	-1.58387	0.0428571	0.14134
SIG_IL4RECEPTOR_IN_B_LYPHOCYTES	Forskolin	20	-0.296017	-1.57953	0.0538922	0.143491
HSA05214_GLIOMA	Forskolin	49	-0.188836	-1.57797	0.0607843	0.143896
NOUZOVA_CPG_H4_UP	Forskolin	69	-0.165134	-1.57567	0.0482897	0.144877
CASPASEPATHWAY	Forskolin	17	-0.316437	-1.57403	0.0523139	0.145294
ZHAN_MULTIPLE_MYELOMA_SUBCLASSES_DIFF	Forskolin	23	-0.27708	-1.56656	0.0443548	0.149717
MUNSHI_MM_UP	Forskolin	38	-0.209638	-1.56386	0.0587084	0.151026
HSA05212_PANCREATIC_CANCER	Forskolin	57	-0.17683	-1.56302	0.0509434	0.150881
CIRCADIAN_EXERCISE	Forskolin	32	-0.235242	-1.55943	0.0490798	0.152848
NEMETH_TNF_DN	Forskolin	21	-0.283662	-1.55731	0.0567951	0.153863
GERY_CEBP_TARGETS	Forskolin	78	-0.150706	-1.55656	0.0628931	0.153742
FSH_OVARY_MCV152_DN	Forskolin	37	-0.21933	-1.55604	0.0508475	0.153503
CIS_XPC_DN	Forskolin	115	-0.124279	-1.55477	0.0399202	0.153723
GH_AUTOCRINE_UP	Forskolin	129	-0.116642	-1.55317	0.075	0.154237
ADIP_DIFF_CLUSTER4	Forskolin	21	-0.281648	-1.55285	0.0393701	0.153805
HSC_INTERMEDIATEPROGENITORS_FETAL	Forskolin	98	-0.129187	-1.546	0.0518962	0.158061
STRESS_GENOTOXIC_SPECIFIC_UP	Forskolin	21	-0.286616	-1.54463	0.0594059	0.15849
ADIP_DIFF_CLUSTER3	Forskolin	25	-0.26033	-1.54352	0.0547667	0.158589
ROTH_HTERT_DIFF	Forskolin	20	-0.282491	-1.53696	0.0682731	0.16251
HSA05210_COLORECTAL_CANCER	Forskolin	72	-0.158364	-1.53534	0.0641509	0.163209
ADIPOGENESIS_HMSC_CLASS3_UP	Forskolin	47	-0.191878	-1.53244	0.0589391	0.164597
HSA05223_NON_SMALL_CELL_LUNG_CANCER	Forskolin	38	-0.208074	-1.53188	0.0526316	0.164362
PEART_HISTONE_DN	Forskolin	51	-0.181311	-1.53008	0.0591837	0.165126
UVC_HIGH_D2_DN	Forskolin	27	-0.251366	-1.52926	0.0649351	0.165094
SA_B_CELL_RECEPTOR_COMPLEXES	Forskolin	19	-0.299424	-1.52339	0.0632653	0.168995
HSA04916_MELANOGENESIS	Forskolin	77	-0.147395	-1.51973	0.0617284	0.171263
HSA04540_GAP_JUNCTION	Forskolin	66	-0.16005	-1.51955	0.0668058	0.170765
WANG_MLL_CBP_VS_GMP_DN	Forskolin	28	-0.236638	-1.51923	0.0454545	0.170339
AGED_MOUSE_CORTEX_UP	Forskolin	24	-0.259524	-1.51682	0.0745698	0.171618
STEFFEN_AML_PML_PLZF_TRGT	Forskolin	23	-0.262815	-1.51609	0.0494845	0.171586
HSA00650_BUTANOATE_METABOLISM	Forskolin	33	-0.218504	-1.51035	0.0576541	0.175348
ST_GAQ_PATHWAY	Forskolin	17	-0.307662	-1.50994	0.075	0.175037
HSA05221_ACUTE_MYELOID_LEUKEMIA	Forskolin	37	-0.206296	-1.50781	0.067623	0.17606
UVC_HIGH_D8_DN	Forskolin	20	-0.282681	-1.50763	0.0727273	0.175556
UVC_TTD_ALL_DN	Forskolin	278	-0.0776804	-1.50377	0.0681363	0.177811
HSA04912_GNRH_SIGNALING_PATHWAY	Forskolin	64	-0.163356	-1.502	0.0778443	0.178541
41BBPATHWAY	Forskolin	15	-0.3235	-1.5015	0.0862423	0.17828
STRESS_TPA_SPECIFIC_UP	Forskolin	26	-0.24474	-1.50076	0.0698152	0.178177
TPA_SENS_EARLY_UP	Forskolin	34	-0.212319	-1.5006	0.0695296	0.177665
OKUMURA_MC_LPS	Forskolin	111	-0.122877	-1.49705	0.0781563	0.179733
YAGI_AML_PROGNOSIS	Forskolin	22	-0.263232	-1.48861	0.0596421	0.185762
FERRANDO_MLL_T_ALL_DN	Forskolin	60	-0.162294	-1.48488	0.0721443	0.188291
G2PATHWAY	Forskolin	16	-0.310256	-1.48273	0.0729783	0.189447
ZHAN_MMPC_SIM	Forskolin	30	-0.222403	-1.47991	0.0761523	0.191016
IDX_TSA_UP_CLUSTER3	Forskolin	73	-0.145351	-1.47578	0.0786749	0.193863
CMV-UV_HCMV_6HRS_UP	Forskolin	77	-0.143998	-1.47559	0.0722892	0.193354
CHESLER_BRAIN_CIS_GENES	Forskolin	39	-0.200544	-1.47484	0.0663984	0.193239
NEMETH_TNF_UP	Forskolin	52	-0.17523	-1.47089	0.0843621	0.195968
PENG_RAPAMYCIN_UP	Forskolin	86	-0.133096	-1.46443	0.0746562	0.200846
LEE_TCELLS1_UP	Forskolin	115	-0.113799	-1.46126	0.0796646	0.202751
HUMAN_CD34_ENRICHED_TRANSCRIPTION_FACTORS	Forskolin	103	-0.125453	-1.46074	0.0833333	0.202468
JECHLINGER_EMT_DN	Forskolin	29	-0.226327	-1.45928	0.0824742	0.203132
IFNALPHA_RESIST_DN	Forskolin	16	-0.295646	-1.45887	0.0851927	0.202771
HSA04350_TGF_BETA_SIGNALING_PATHWAY	Forskolin	70	-0.151042	-1.45865	0.0674603	0.202293
ZHAN_MMPC_EARLYVS	Forskolin	36	-0.209429	-1.45551	0.0845865	0.204398
KUROKAWA_5FU_IFN_SENSITIVE_VS_RESISTANT_DN	Forskolin	24	-0.253861	-1.45388	0.09375	0.205001
ADIP_DIFF_CLUSTER2	Forskolin	28	-0.229392	-1.45242	0.0892857	0.205546
HDACI_COLON_BUT_DN	Forskolin	174	-0.0959116	-1.45073	0.100604	0.206174
PASSERINI_APOPTOSIS	Forskolin	31	-0.222469	-1.44957	0.0846774	0.206566
LEE_TCELLS8_UP	Forskolin	115	-0.113799	-1.44598	0.0744467	0.209068
ACTINYPATHWAY	Forskolin	15	-0.305337	-1.44284	0.0916179	0.211043
MITOCHONDRIAPATHWAY	Forskolin	15	-0.300115	-1.44211	0.0972222	0.211002
NADLER_OBESITY_HYPERGLYCEMIA	Forskolin	20	-0.272998	-1.44196	0.100616	0.210411
AGED_MOUSE_NEOCORTEX_UP	Forskolin	46	-0.177375	-1.43376	0.109312	0.216803
P21_P53_ANY_DN	Forskolin	34	-0.213193	-1.43335	0.0753968	0.216407
HSA04310_WNT_SIGNALING_PATHWAY	Forskolin	115	-0.113632	-1.42906	0.0987654	0.219367
OLD_FIBRO_DN	Forskolin	100	-0.12236	-1.42722	0.106742	0.220296
HSC_INTERMEDIATEPROGENITORS_ADULT	Forskolin	89	-0.130488	-1.4258	0.086	0.220799
DEATHPATHWAY	Forskolin	25	-0.239286	-1.42494	0.1	0.220801
TPA_SENS_MIDDLE_UP	Forskolin	42	-0.191039	-1.4248	0.0848126	0.220225
STRESSPATHWAY	Forskolin	16	-0.285952	-1.42131	0.109865	0.222964
HSA04012_ERBB_SIGNALING_PATHWAY	Forskolin	67	-0.143783	-1.41957	0.0948617	0.223859
PDGFPATHWAY	Forskolin	19	-0.270309	-1.4173	0.117063	0.225527
CANCER_UNDIFFERENTIATED_META_UP	Forskolin	50	-0.170377	-1.41605	0.103734	0.226053
HSA05222_SMALL_CELL_LUNG_CANCER	Forskolin	68	-0.142321	-1.41393	0.0933063	0.227251
CITED1_KO_HET_DN	Forskolin	21	-0.249667	-1.4107	0.0941884	0.22964
LEE_TCELLS10_UP	Forskolin	115	-0.113799	-1.41036	0.124736	0.229219
ST_GRANULE_CELL_SURVIVAL_PATHWAY	Forskolin	21	-0.257186	-1.40893	0.112871	0.229756
EGFPATHWAY	Forskolin	19	-0.270309	-1.40729	0.100386	0.230562
ST_ERK1_ERK2_MAPK_PATHWAY	Forskolin	25	-0.230759	-1.40605	0.0974155	0.231028
HSA00562_INOSITOL_PHOSPHATE_METABOLISM	Forskolin	35	-0.197594	-1.39949	0.102767	0.236663
MAPK_CASCADE	Forskolin	19	-0.270309	-1.3982	0.101562	0.237136
PROTEASOMEPATHWAY	Forskolin	18	-0.27497	-1.39398	0.115094	0.240619
IGF1MTORPATHWAY	Forskolin	18	-0.274544	-1.3913	0.120623	0.242537
ST_MYOCYTE_AD_PATHWAY	Forskolin	19	-0.261705	-1.39075	0.121387	0.242354
SIG_PIP3_SIGNALING_IN_B_LYMPHOCYTES	Forskolin	24	-0.237347	-1.38633	0.11946	0.246009
HDACI_COLON_CURSUL_UP	Forskolin	25	-0.228458	-1.38394	0.105973	0.247853
PROSTAGLANDIN_AND_LEUKOTRIENE_METABOLISM	Forskolin	18	-0.271298	-1.38179	0.12449	0.249262
BRCA1_SW480_UP	Forskolin	17	-0.280995	-1.37979	0.117895	0.250448
ADIP_VS_PREADIP_DN	Forskolin	27	-0.224587	-1.37569	0.133874	0.253809
PROLIFERATION_GENES	Forskolin	246	-0.0765298	-1.3725	0.115538	0.256341
UVC_XPCS_8HR_UP	Forskolin	34	-0.19632	-1.37138	0.135755	0.256711
BYSTRYKH_HSC_CIS_GLOCUS	Forskolin	76	-0.133233	-1.37125	0.127237	0.256033
AS3_FIBRO_C3	Forskolin	31	-0.204627	-1.36883	0.140594	0.25792
SHEPARD_CELL_PROLIFERATION	Forskolin	139	-0.0980343	-1.36536	0.133333	0.260599
CELL_SURFACE_RECEPTOR_LINKED_SIGNAL_TRANSDUCTION	Forskolin	73	-0.134043	-1.36466	0.113095	0.26055
RUIZ_TENASCIN_TARGETS	Forskolin	66	-0.139882	-1.35952	0.132797	0.264971
FLECHNER_KIDNEY_TRANSPLANT_REJECTION_PBL_DN	Forskolin	33	-0.196578	-1.35335	0.125	0.270971
PASSERINI_TRANSCRIPTION	Forskolin	54	-0.157375	-1.35331	0.116832	0.270194
BECKER_TAMOXIFEN_RESISTANT_UP	Forskolin	23	-0.230771	-1.34885	0.119772	0.274075
UVC_HIGH_D7_DN	Forskolin	22	-0.24287	-1.34501	0.118577	0.277403
SASAKI_ATL_UP	Forskolin	126	-0.100412	-1.3444	0.144603	0.277371
CELL_PROLIFERATION	Forskolin	139	-0.0980343	-1.34275	0.132114	0.278387
REN_E2F1_TARGETS	Forskolin	29	-0.213163	-1.34221	0.140625	0.278199
HSA00120_BILE_ACID_BIOSYNTHESIS	Forskolin	26	-0.221257	-1.33932	0.1423	0.280432
CELL_MOTILITY	Forskolin	71	-0.13603	-1.33666	0.155689	0.282394
HDACI_COLON_TSABUT_DN	Forskolin	16	-0.282596	-1.33577	0.129098	0.28264
AS3_FIBRO_UP	Forskolin	31	-0.204627	-1.33506	0.158215	0.282569
IGF1_NIH3T3_UP	Forskolin	24	-0.225376	-1.33325	0.143701	0.283715
HSA00450_SELENOAMINO_ACID_METABOLISM	Forskolin	21	-0.240475	-1.33009	0.153543	0.286439
ST_DIFFERENTIATION_PATHWAY_IN_PC12_CELLS	Forskolin	35	-0.187457	-1.32666	0.136187	0.289293
BYSTROM_IL5_DN	Forskolin	46	-0.16519	-1.3222	0.15444	0.293532
P21_ANY_DN	Forskolin	24	-0.221927	-1.31925	0.151631	0.296035
ST_P38_MAPK_PATHWAY	Forskolin	32	-0.1983	-1.31764	0.161554	0.296995
YAGI_AML_PROG_ASSOC	Forskolin	77	-0.127455	-1.31485	0.145418	0.299261
INOSITOL_PHOSPHATE_METABOLISM	Forskolin	18	-0.258876	-1.3143	0.148077	0.299062
AGED_MOUSE_CORTEX_DN	Forskolin	29	-0.200509	-1.31277	0.137725	0.299943
HSA00240_PYRIMIDINE_METABOLISM	Forskolin	65	-0.136683	-1.31151	0.146392	0.300618
UVC_TTD_4HR_DN	Forskolin	228	-0.0760356	-1.30929	0.154	0.302261
ATRBRCAPATHWAY	Forskolin	18	-0.249074	-1.30595	0.168337	0.305233
CMV_HCMV_TIMECOURSE_24HRS_UP	Forskolin	47	-0.161743	-1.29897	0.158537	0.312565
HOFMANN_MDS_CD34_LOW_AND_HIGH_RISK	Forskolin	24	-0.219844	-1.29714	0.156	0.313853
SIG_CHEMOTAXIS	Forskolin	40	-0.168811	-1.29625	0.167331	0.314066
VHL_RCC_UP	Forskolin	72	-0.131815	-1.29583	0.162551	0.313674
INTEGRINPATHWAY	Forskolin	28	-0.207739	-1.29439	0.18239	0.314506
HSA03022_BASAL_TRANSCRIPTION_FACTORS	Forskolin	21	-0.233352	-1.29417	0.160966	0.31393
SASAKI_TCELL_LYMPHOMA_VS_CD4_UP	Forskolin	126	-0.100412	-1.29312	0.152475	0.314338
HSA00532_CHONDROITIN_SULFATE_BIOSYNTHESIS	Forskolin	15	-0.276023	-1.29193	0.156379	0.314846
P38MAPKPATHWAY	Forskolin	30	-0.198551	-1.28988	0.168699	0.316412
FALT_BCLL_IG_MUTATED_VS_WT_DN	Forskolin	25	-0.216982	-1.2896	0.169625	0.31586
NFKBPATHWAY	Forskolin	15	-0.279157	-1.28804	0.17234	0.316983
GUO_HEX_UP	Forskolin	51	-0.155154	-1.28582	0.185185	0.318702
HDACI_COLON_CUR12HRS_UP	Forskolin	15	-0.279176	-1.28554	0.186538	0.318129
HSA05110_CHOLERA_INFECTION	Forskolin	28	-0.200865	-1.27854	0.163482	0.325834
TOLLPATHWAY	Forskolin	24	-0.224934	-1.27729	0.191667	0.32638
HALMOS_CEBP_UP	Forskolin	38	-0.176967	-1.2764	0.170874	0.326664
HDACI_COLON_SUL12HRS_UP	Forskolin	18	-0.248369	-1.27369	0.187381	0.329179
PARK_MSCS_BOTH	Forskolin	29	-0.198616	-1.26659	0.18595	0.337336
FCER1PATHWAY	Forskolin	25	-0.212515	-1.26475	0.198502	0.338727
HOFMANN_MANTEL_LYMPHOMA_VS_LYMPH_NODES_UP	Forskolin	32	-0.18841	-1.26434	0.163776	0.338332
HSC_STHSC_ADULT	Forskolin	30	-0.191631	-1.26398	0.167339	0.33789
SHEPARD_NEG_REG_OF_CELL_PROLIFERATION	Forskolin	71	-0.127315	-1.2617	0.184874	0.339942
ZHAN_MM_MOLECULAR_CLASSI_DN	Forskolin	27	-0.203568	-1.257	0.208661	0.344858
ALKPATHWAY	Forskolin	27	-0.200603	-1.25536	0.188605	0.345938
NKTPATHWAY	Forskolin	19	-0.241876	-1.25532	0.203285	0.345083
HSA00340_HISTIDINE_METABOLISM	Forskolin	29	-0.196357	-1.25485	0.201646	0.344799
RAY_P210_DIFF	Forskolin	37	-0.172847	-1.25214	0.185468	0.347361
TSADAC_HYPOMETH_OVCA_UP	Forskolin	26	-0.205661	-1.25147	0.183752	0.34739
HSA04340_HEDGEHOG_SIGNALING_PATHWAY	Forskolin	41	-0.166239	-1.25037	0.219409	0.347901
YANG_OSTECLASTS_SIG	Forskolin	16	-0.26107	-1.24773	0.190574	0.350316
H2O2_CSBDIFF_C1	Forskolin	20	-0.2273	-1.24728	0.199179	0.349994
CMV_HCMV_TIMECOURSE_20HRS_UP	Forskolin	60	-0.135822	-1.24632	0.188406	0.350269
HSA04630_JAK_STAT_SIGNALING_PATHWAY	Forskolin	97	-0.111048	-1.24599	0.198397	0.34978
HSC_HSC_ADULT	Forskolin	191	-0.0778374	-1.2447	0.203704	0.35052
UV-CMV_UNIQUE_HCMV_6HRS_UP	Forskolin	66	-0.129949	-1.24046	0.210938	0.355029
TNFALPHA_ALL_UP	Forskolin	42	-0.165807	-1.24027	0.203219	0.354334
LH_GRANULOSA_DN	Forskolin	52	-0.145662	-1.23635	0.195745	0.35844
TOB1PATHWAY	Forskolin	15	-0.266394	-1.2353	0.192308	0.358963
HSA00230_PURINE_METABOLISM	Forskolin	99	-0.107449	-1.23203	0.190476	0.362298
FSH_GRANULOSA_DN	Forskolin	52	-0.145662	-1.23189	0.212062	0.361561
GSK3PATHWAY	Forskolin	20	-0.229171	-1.2316	0.201521	0.361044
TCRPATHWAY	Forskolin	29	-0.193225	-1.23139	0.202929	0.360424
ASTIER_FN_DIFF	Forskolin	39	-0.16841	-1.22968	0.228866	0.361816
SANSOM_APC_LOSS4_UP	Forskolin	77	-0.120016	-1.22938	0.195402	0.361321
LU_IL4BCELL	Forskolin	46	-0.152859	-1.22918	0.220441	0.360648
CERAMIDEPATHWAY	Forskolin	15	-0.265075	-1.2275	0.224652	0.361947
HDACI_COLON_BUT30MIN_DN	Forskolin	29	-0.196204	-1.22655	0.202062	0.362294
HSA04370_VEGF_SIGNALING_PATHWAY	Forskolin	53	-0.145717	-1.22444	0.209205	0.364039
ASTIER_BCELL	Forskolin	38	-0.166368	-1.22354	0.228346	0.364342
AGUIRRE_PANCREAS_CHR6	Forskolin	27	-0.197314	-1.22039	0.227092	0.367409
O6BG_RESIST_MEDULLOBLASTOMA_DN	Forskolin	32	-0.184244	-1.21991	0.213251	0.367111
AGUIRRE_PANCREAS_CHR22	Forskolin	43	-0.15829	-1.21781	0.199597	0.368752
HDACI_COLON_CUR24HRS_UP	Forskolin	27	-0.20174	-1.21704	0.215606	0.368835
PASSERINI_PROLIFERATION	Forskolin	44	-0.152911	-1.21496	0.219758	0.370816
FERNANDEZ_MYC_TARGETS	Forskolin	109	-0.0996802	-1.21471	0.215501	0.370234
HYPOXIA_RCC_NOVHL_UP	Forskolin	46	-0.150078	-1.21093	0.229675	0.374279
ANDROGEN_GENES	Forskolin	24	-0.202336	-1.21091	0.214429	0.373399
ZELLER_MYC_UP	Forskolin	20	-0.223908	-1.20899	0.2423	0.37504
BUTANOATE_METABOLISM	Forskolin	22	-0.218332	-1.20813	0.223176	0.375233
BLOOD_CLOTTING_CASCADE	Forskolin	17	-0.24568	-1.20528	0.244048	0.378021
VANTVEER_BREAST_OUTCOME_GOOD_VS_POOR_UP	Forskolin	17	-0.241311	-1.20469	0.219231	0.377881
LIAN_MYELOID_DIFF_TF	Forskolin	23	-0.210276	-1.20438	0.224	0.377356
CMV_UV-CMV_COMMON_HCMV_6HRS_DN	Forskolin	20	-0.220922	-1.20045	0.248	0.381769
UEDA_MOUSE_SCN	Forskolin	57	-0.132984	-1.1984	0.237219	0.383654
CMV_HCMV_TIMECOURSE_6HRS_DN	Forskolin	36	-0.168513	-1.1976	0.224532	0.383828
CALCINEURIN_NF_AT_SIGNALING	Forskolin	54	-0.135522	-1.19513	0.224949	0.386086
MMS_MOUSE_LYMPH_HIGH_4HRS_UP	Forskolin	21	-0.222849	-1.19364	0.221996	0.387182
HOHENKIRK_MONOCYTE_DEND_DN	Forskolin	75	-0.116174	-1.19051	0.253012	0.390633
FSH_GRANULOSA_UP	Forskolin	57	-0.136563	-1.18834	0.247423	0.392693
HSA05130_PATHOGENIC_ESCHERICHIA_COLI_INFECTION_EHEC	Forskolin	30	-0.179218	-1.18432	0.238683	0.397392
BYSTROM_IL5_UP	Forskolin	24	-0.207745	-1.18356	0.247444	0.397526
ROSS_CBF_LEUKEMIA	Forskolin	40	-0.155938	-1.18205	0.25	0.398638
HDACI_COLON_TSA_UP	Forskolin	75	-0.116981	-1.18186	0.259794	0.397946
AGED_MOUSE_MUSCLE_UP	Forskolin	18	-0.237042	-1.17854	0.241379	0.401448
MYOD_NIH3T3_UP	Forskolin	66	-0.121285	-1.17539	0.23	0.404804
MUNSHI_MM_VS_PCS_UP	Forskolin	46	-0.147647	-1.17452	0.276507	0.40513
HSA04910_INSULIN_SIGNALING_PATHWAY	Forskolin	98	-0.103516	-1.17076	0.228	0.409446
RIBAVIRIN_RSV_DN	Forskolin	31	-0.180607	-1.17074	0.2537	0.408533
STANELLE_E2F1_UP	Forskolin	22	-0.203664	-1.17071	0.252588	0.407626
HSA05131_PATHOGENIC_ESCHERICHIA_COLI_INFECTION_EPEC	Forskolin	30	-0.179218	-1.16909	0.242884	0.409059
LEE_TCELLS3_UP	Forskolin	71	-0.118202	-1.16868	0.26572	0.408693
HALMOS_CEBP_DN	Forskolin	30	-0.175643	-1.16704	0.269307	0.409885
TPA_RESIST_EARLY_UP	Forskolin	22	-0.207458	-1.16634	0.25502	0.409989
HSA00310_LYSINE_DEGRADATION	Forskolin	30	-0.176054	-1.16565	0.268775	0.410016
HSA04720_LONG_TERM_POTENTIATION	Forskolin	48	-0.140357	-1.16477	0.254826	0.410305
UVC_XPCS_4HR_DN	Forskolin	180	-0.073882	-1.1578	0.289474	0.419317
BRACX_UP	Forskolin	18	-0.227081	-1.15674	0.26327	0.419851
HSA04070_PHOSPHATIDYLINOSITOL_SIGNALING_SYSTEM	Forskolin	55	-0.13069	-1.15326	0.278656	0.424083
EDG1PATHWAY	Forskolin	17	-0.234113	-1.14819	0.302281	0.430595
DSRNA_UP	Forskolin	27	-0.180421	-1.14737	0.269231	0.43075
MOREAUX_TACI_HI_IN_BMPC	Forskolin	44	-0.143223	-1.1473	0.268924	0.429878
HSA04150_MTOR_SIGNALING_PATHWAY	Forskolin	34	-0.166203	-1.14704	0.262948	0.42924
HASLINGER_B_CLL_11Q23	Forskolin	17	-0.228134	-1.14524	0.274428	0.430901
CARIES_PULP_HIGH_UP	Forskolin	43	-0.144856	-1.14189	0.264706	0.434777
HYPOPHYSECTOMY_RAT_UP	Forskolin	21	-0.208092	-1.13995	0.284916	0.43668
HEMATOPOESIS_RELATED_TRANSCRIPTION_FACTORS	Forskolin	62	-0.122624	-1.13941	0.288973	0.436506
4NQO_UNIQUE_FIBRO_UP	Forskolin	18	-0.221844	-1.13512	0.289628	0.441766
VERHAAK_AML_NPM1_MUT_VS_WT_UP	Forskolin	103	-0.0984501	-1.13468	0.279297	0.441441
SIG_BCR_SIGNALING_PATHWAY	Forskolin	30	-0.174186	-1.12953	0.289272	0.448267
APOPTOSIS_KEGG	Forskolin	39	-0.149597	-1.12656	0.303279	0.451721
HSA00251_GLUTAMATE_METABOLISM	Forskolin	24	-0.196768	-1.12642	0.292683	0.450893
HSA00860_PORPHYRIN_AND_CHLOROPHYLL_METABOLISM	Forskolin	19	-0.211073	-1.12572	0.320487	0.450906
CMV-UV_HCMV_6HRS_DN	Forskolin	71	-0.111985	-1.12217	0.278455	0.45502
GN_CAMP_GRANULOSA_UP	Forskolin	40	-0.146257	-1.12205	0.300403	0.454169
WANG_MLL_CBP_VS_GMP_UP	Forskolin	27	-0.180395	-1.12051	0.299803	0.455441
STOSSI_ER_UP	Forskolin	30	-0.163813	-1.12022	0.292636	0.454833
SHIPP_FL_VS_DLBCL_DN	Forskolin	20	-0.20285	-1.11707	0.287129	0.458661
IL2RBPATHWAY	Forskolin	26	-0.185013	-1.1166	0.328713	0.458324
HSA04730_LONG_TERM_DEPRESSION	Forskolin	56	-0.127637	-1.11469	0.296371	0.460072
BRCA2_BRCA1_UP	Forskolin	30	-0.169718	-1.11419	0.309804	0.459801
UV-4NQO_FIBRO_DN	Forskolin	20	-0.19858	-1.11222	0.308468	0.461752
IFN_BETA_GLIOMA_UP	Forskolin	45	-0.139496	-1.11022	0.33195	0.463697
WNT_TARGETS	Forskolin	16	-0.230266	-1.10982	0.298969	0.463219
CPR_LOW_LIVER_DN	Forskolin	17	-0.224023	-1.1074	0.317647	0.465843
CELL_CYCLE_ARREST	Forskolin	19	-0.210707	-1.10637	0.3	0.466577
BRCA1KO_MEF_DN	Forskolin	66	-0.115344	-1.10495	0.320564	0.46777
WNTPATHWAY	Forskolin	20	-0.203499	-1.10365	0.321862	0.468747
FERRARI_4HPR_UP	Forskolin	16	-0.226113	-1.09904	0.333333	0.474632
ST_DICTYOSTELIUM_DISCOIDEUM_CAMP_CHEMOTAXIS_PATHWAY	Forskolin	24	-0.187582	-1.09854	0.348515	0.474425
LVAD_HEARTFAILURE_UP	Forskolin	63	-0.116807	-1.09783	0.333333	0.474503
BLEO_MOUSE_LYMPH_LOW_24HRS_DN	Forskolin	21	-0.196209	-1.0945	0.328155	0.478516
CMV_HCMV_6HRS_DN	Forskolin	40	-0.146024	-1.09133	0.356846	0.482381
GLYCEROPHOSPHOLIPID_METABOLISM	Forskolin	37	-0.148078	-1.08923	0.339357	0.484667
MOREAUX_TACI_HI_VS_LOW_UP	Forskolin	226	-0.0629033	-1.08739	0.352459	0.486336
HIPPOCAMPUS_DEVELOPMENT_NEONATAL	Forskolin	19	-0.205896	-1.08688	0.326489	0.486217
HSC_STHSC_SHARED	Forskolin	24	-0.183201	-1.08241	0.350294	0.492051
G13_SIGNALING_PATHWAY	Forskolin	27	-0.17308	-1.08156	0.359596	0.492302
BRCA1_MES_UP	Forskolin	31	-0.167776	-1.07948	0.346154	0.494433
IRS_KO_ADIP_UP	Forskolin	18	-0.213588	-1.07894	0.337474	0.49427
IRITANI_ADPROX_LYMPH	Forskolin	92	-0.0980164	-1.07805	0.366795	0.494586
LAL_KO_3MO_UP	Forskolin	25	-0.179693	-1.07737	0.34127	0.494569
BRG1_ALAB_UP	Forskolin	29	-0.168015	-1.07479	0.352459	0.497457
NI2_MOUSE_UP	Forskolin	30	-0.16487	-1.07195	0.332649	0.501048
HOUSTIS_ROS	Forskolin	18	-0.206223	-1.063	0.37525	0.513957
P21_P53_MIDDLE_DN	Forskolin	17	-0.213148	-1.05993	0.355422	0.517606
RORIE_ES_PNET_UP	Forskolin	16	-0.218228	-1.05945	0.387164	0.517241
TNFALPHA_4HRS_UP	Forskolin	25	-0.177054	-1.05614	0.373281	0.521606
TNFALPHA_30MIN_UP	Forskolin	20	-0.199071	-1.0561	0.37365	0.520607
ZHAN_MMPC_SIM_BC_AND_MM	Forskolin	25	-0.178462	-1.05226	0.38125	0.525917
WIELAND_HEPATITIS_B_INDUCED	Forskolin	49	-0.124703	-1.05056	0.379447	0.52745
HDACI_COLON_CLUSTER9	Forskolin	41	-0.139225	-1.0494	0.380414	0.528203
ECMPATHWAY	Forskolin	20	-0.195874	-1.04712	0.397177	0.530761
HSA00052_GALACTOSE_METABOLISM	Forskolin	24	-0.175626	-1.04698	0.377358	0.52991
OXSTRESS_RPE_H2O2HNE_DN	Forskolin	21	-0.190094	-1.04368	0.38171	0.534076
HSC_STHSC_FETAL	Forskolin	24	-0.183201	-1.04307	0.398785	0.533944
ST_ADRENERGIC	Forskolin	28	-0.165817	-1.04027	0.389452	0.537283
GLUTAMATE_METABOLISM	Forskolin	19	-0.199587	-1.03868	0.38326	0.538774
SHIPP_DLBCL_CURED_DN	Forskolin	23	-0.17878	-1.03653	0.389535	0.541234
FRASOR_ER_UP	Forskolin	24	-0.174242	-1.03545	0.391481	0.541923
BYSTRYKH_HSC_BRAIN_TRANS_GLOCUS	Forskolin	124	-0.0801803	-1.03494	0.402647	0.541681
CALRES_RHESUS_DN	Forskolin	34	-0.147574	-1.03457	0.376984	0.541162
UVC_LOW_ALL_DN	Forskolin	43	-0.13494	-1.03366	0.409901	0.541529
HSA04320_DORSO_VENTRAL_AXIS_FORMATION	Forskolin	21	-0.19132	-1.03236	0.413793	0.542644
PYK2PATHWAY	Forskolin	20	-0.189256	-1.03052	0.40552	0.544729
ROSS_CBF_MYH	Forskolin	32	-0.152936	-1.02571	0.401942	0.551393
MARCINIAK_CHOP_DIFF	Forskolin	15	-0.215161	-1.01119	0.413306	0.574069
HDACI_COLON_TSABUT_UP	Forskolin	43	-0.130224	-1.00755	0.398	0.578978
CALRES_MOUSE_NEOCORTEX_DN	Forskolin	49	-0.1257	-1.00729	0.454545	0.578246
WANG_HOXA9_VS_MEIS1_UP	Forskolin	16	-0.209532	-1.00607	0.441989	0.579119
ROS_MOUSE_AORTA_DN	Forskolin	50	-0.118231	-1.00243	0.449902	0.58418
TARTE_BCELL	Forskolin	25	-0.168897	-1.00064	0.420382	0.586193
ADIP_VS_FIBRO_DN	Forskolin	21	-0.182155	-0.996878	0.45283	0.591256
SRC_ONCOGENIC_SIGNATURE	Forskolin	45	-0.125913	-0.995194	0.436874	0.592888
IL12PATHWAY	Forskolin	15	-0.209351	-0.994696	0.413361	0.592676
TESTIS_EXPRESSED_GENES	Forskolin	25	-0.165081	-0.990941	0.449153	0.597854
OXSTRESS_RPETWO_DN	Forskolin	70	-0.101776	-0.986391	0.462185	0.604634
HDACI_COLON_BUT24HRS_UP	Forskolin	45	-0.126546	-0.983427	0.454183	0.608471
HSC_LTHSC_SHARED	Forskolin	166	-0.0653113	-0.981748	0.455487	0.610004
UVC_HIGH_D4_DN	Forskolin	38	-0.136395	-0.979508	0.45057	0.612681
HOFFMANN_BIVSBII_LGBII	Forskolin	65	-0.101005	-0.97797	0.486	0.614037
VANASSE_BCL2_TARGETS	Forskolin	55	-0.11108	-0.977791	0.483301	0.613165
HSC_LTHSC_FETAL	Forskolin	166	-0.0653113	-0.976706	0.43125	0.613844
HDACI_COLON_BUT12HRS_UP	Forskolin	28	-0.152055	-0.975693	0.453307	0.614373
IL1RPATHWAY	Forskolin	20	-0.186553	-0.972109	0.476861	0.619394
DAC_BLADDER_UP	Forskolin	15	-0.20797	-0.96789	0.485417	0.625292
CANTHARIDIN_DN	Forskolin	31	-0.145022	-0.964452	0.478958	0.630052
SANA_TNFA_ENDOTHELIAL_UP	Forskolin	41	-0.125053	-0.963157	0.484536	0.631134
HSA00150_ANDROGEN_AND_ESTROGEN_METABOLISM	Forskolin	23	-0.167926	-0.963094	0.507071	0.630047
DORSEY_DOXYCYCLINE_UP	Forskolin	23	-0.172033	-0.963069	0.497925	0.628908
ST_T_CELL_SIGNAL_TRANSDUCTION	Forskolin	31	-0.143689	-0.962309	0.492958	0.629049
COCAINE_BRAIN_5D_UP	Forskolin	42	-0.124853	-0.960604	0.505176	0.630828
BADPATHWAY	Forskolin	16	-0.195434	-0.953184	0.476	0.642043
E2F3_ONCOGENIC_SIGNATURE	Forskolin	155	-0.0676565	-0.951748	0.522634	0.643386
ST_G_ALPHA_I_PATHWAY	Forskolin	30	-0.145907	-0.9512	0.494737	0.643081
HSA00970_AMINOACYL_TRNA_BIOSYNTHESIS	Forskolin	29	-0.14852	-0.946889	0.544177	0.649221
BRENTANI_CELL_ADHESION	Forskolin	65	-0.0987849	-0.945762	0.492693	0.649854
BRENTANI_IMMUNE_FUNCTION	Forskolin	25	-0.156072	-0.942721	0.529637	0.653604
OLDONLY_FIBRO_UP	Forskolin	26	-0.153934	-0.942485	0.517578	0.652743
HDACI_COLON_CUR24HRS_DN	Forskolin	19	-0.178309	-0.941109	0.5	0.653997
SANA_IFNG_ENDOTHELIAL_UP	Forskolin	29	-0.145254	-0.939955	0.50996	0.654752
PRMT5_KD_DN	Forskolin	19	-0.182724	-0.937224	0.52505	0.658354
ADIP_DIFF_CLUSTER5	Forskolin	22	-0.169611	-0.934372	0.552734	0.661893
UVC_TTD_ALL_UP	Forskolin	40	-0.128534	-0.934178	0.507968	0.660954
HDACI_COLON_TSA12HRS_UP	Forskolin	17	-0.189509	-0.93373	0.533597	0.660576
VEGF_HUVEC_2HRS_UP	Forskolin	18	-0.178241	-0.933237	0.52439	0.660161
HDACI_COLON_BUT_UP	Forskolin	104	-0.0766748	-0.93225	0.52439	0.660709
ETSPATHWAY	Forskolin	15	-0.200616	-0.924577	0.530612	0.672901
FLAGELLAR_ASSEMBLY	Forskolin	15	-0.192852	-0.923953	0.538618	0.672745
GH_GHRHR_KO_24HRS_UP	Forskolin	100	-0.0790914	-0.919223	0.561265	0.679663
HSA04330_NOTCH_SIGNALING_PATHWAY	Forskolin	33	-0.133317	-0.918817	0.577167	0.679094
INTEGRIN_MEDIATED_CELL_ADHESION_KEGG	Forskolin	69	-0.0930829	-0.918741	0.55106	0.678005
GAMMA_UNIQUE_FIBRO_DN	Forskolin	45	-0.115981	-0.917727	0.573099	0.678459
ERKPATHWAY	Forskolin	23	-0.153393	-0.917236	0.535448	0.678
NADLER_OBESITY_DN	Forskolin	23	-0.162713	-0.916585	0.548117	0.677887
FMLPPATHWAY	Forskolin	22	-0.163301	-0.916222	0.552987	0.677296
JNK_UP	Forskolin	18	-0.17562	-0.915121	0.548	0.677992
BCRPATHWAY	Forskolin	22	-0.16067	-0.913051	0.553535	0.680481
H2O2_CSBRESCUED_UP	Forskolin	36	-0.126167	-0.912596	0.560878	0.680011
CMV_HCMV_TIMECOURSE_12HRS_UP	Forskolin	17	-0.18498	-0.909777	0.595918	0.683635
LEE_MYC_UP	Forskolin	38	-0.124477	-0.905807	0.577465	0.689377
BREASTCA_THREE_CLASSES	Forskolin	25	-0.159168	-0.904481	0.552301	0.690429
ZHAN_MULTIPLE_MYELOMA_VS_NORMAL_UP	Forskolin	37	-0.125368	-0.904158	0.540698	0.689805
AT1RPATHWAY	Forskolin	24	-0.155735	-0.901967	0.569138	0.692357
ATP_SYNTHESIS	Forskolin	15	-0.192852	-0.900961	0.56639	0.692925
ROSS_FAB_M7	Forskolin	48	-0.10911	-0.895793	0.577909	0.700402
ZHAN_MM_CD138_PR_VS_REST	Forskolin	29	-0.142446	-0.89551	0.56705	0.6996
HDACI_COLON_TSA2HRS_UP	Forskolin	32	-0.132813	-0.894762	0.589251	0.699661
ZHAN_TONSIL_BONEMARROW	Forskolin	30	-0.137103	-0.893315	0.602041	0.700731
LIZUKA_G2_GR_G3	Forskolin	19	-0.166974	-0.891606	0.5842	0.702378
GOLDRATH_MEMORY	Forskolin	43	-0.112717	-0.891433	0.568507	0.701488
CREBPATHWAY	Forskolin	22	-0.157645	-0.890158	0.575314	0.702357
HSA04520_ADHERENS_JUNCTION	Forskolin	61	-0.0950834	-0.889285	0.572797	0.702695
LAL_KO_6MO_UP	Forskolin	33	-0.135104	-0.888683	0.575397	0.702487
LIZUKA_L1_GR_G1	Forskolin	17	-0.181383	-0.887822	0.584493	0.702628
TGFBETA_LATE_UP	Forskolin	28	-0.137061	-0.885775	0.602362	0.704876
HEARTFAILURE_VENTRICLE_DN	Forskolin	41	-0.119168	-0.885232	0.598039	0.704555
CIS_XPC_UP	Forskolin	96	-0.0777919	-0.884361	0.606719	0.704779
TPA_RESIST_MIDDLE_UP	Forskolin	32	-0.1306	-0.883645	0.585742	0.704663
PURINE_METABOLISM	Forskolin	78	-0.0865423	-0.879424	0.618852	0.710619
HSA03030_DNA_POLYMERASE	Forskolin	15	-0.190157	-0.878837	0.594	0.710421
TRYPTOPHAN_METABOLISM	Forskolin	29	-0.137557	-0.877104	0.589015	0.712288
TYPE_III_SECRETION_SYSTEM	Forskolin	15	-0.192852	-0.87639	0.59519	0.712371
BILE_ACID_BIOSYNTHESIS	Forskolin	18	-0.167873	-0.874927	0.608871	0.713622
TPA_SENS_LATE_UP	Forskolin	35	-0.126445	-0.874304	0.603175	0.713475
ZMPSTE24_KO_UP	Forskolin	19	-0.168079	-0.873105	0.610895	0.714286
IRITANI_ADPROX_UP	Forskolin	19	-0.164872	-0.865258	0.594705	0.725984
AGUIRRE_PANCREAS_CHR7	Forskolin	26	-0.142681	-0.862393	0.621359	0.729545
BASSO_GERMINAL_CENTER_CD40_UP	Forskolin	55	-0.0983951	-0.862169	0.667954	0.728685
HOFFMANN_BIVSBII_IMVM	Forskolin	45	-0.10782	-0.859824	0.598058	0.731297
GH_GHRHR_KO_6HRS_UP	Forskolin	46	-0.107492	-0.859014	0.612	0.731336
HSA00530_AMINOSUGARS_METABOLISM	Forskolin	19	-0.159366	-0.85388	0.647541	0.738458
LINDSTEDT_DEND_8H_VS_48H_UP	Forskolin	33	-0.124324	-0.853816	0.627859	0.737312
KNUDSEN_PMNS_UP	Forskolin	51	-0.0979659	-0.847165	0.630021	0.746948
GHPATHWAY	Forskolin	19	-0.161144	-0.845935	0.646365	0.747763
HDACI_COLON_SUL30MIN_DN	Forskolin	29	-0.131113	-0.844404	0.626186	0.749048
AGUIRRE_PANCREAS_CHR1	Forskolin	21	-0.148935	-0.834513	0.660714	0.764115
HDACI_COLON_BUT16HRS_UP	Forskolin	26	-0.13782	-0.834039	0.662188	0.763561
SANSOM_APC_4_DN	Forskolin	48	-0.102101	-0.8336	0.674747	0.763074
WILLERT_WNT_NCCIT_ALL_UP	Forskolin	16	-0.170346	-0.831604	0.667339	0.765083
ALANINE_AND_ASPARTATE_METABOLISM	Forskolin	16	-0.169701	-0.831417	0.649326	0.76412
PHOTOSYNTHESIS	Forskolin	16	-0.172008	-0.827932	0.69428	0.768475
CROONQUIST_IL6_STARVE_UP	Forskolin	22	-0.146885	-0.826862	0.665362	0.768885
KENNY_WNT_UP	Forskolin	31	-0.122549	-0.823095	0.6926	0.773525
AGEING_BRAIN_DN	Forskolin	92	-0.0734156	-0.822075	0.672269	0.773878
RHOPATHWAY	Forskolin	22	-0.145914	-0.821759	0.67451	0.773173
OLD_FIBRO_UP	Forskolin	42	-0.106349	-0.821135	0.698039	0.772963
CALRES_MOUSE_DN	Forskolin	29	-0.129302	-0.819865	0.679752	0.773625
REOVIRUS_HEK293_DN	Forskolin	158	-0.0562795	-0.819196	0.699387	0.773442
NUCLEAR_RECEPTORS	Forskolin	28	-0.132152	-0.81433	0.708	0.779759
HDACPATHWAY	Forskolin	20	-0.150014	-0.814049	0.691992	0.778914
COCAINE_BRAIN_4WKS_UP	Forskolin	43	-0.104252	-0.813084	0.684848	0.779099
OVARIAN_INFERTILITY_GENES	Forskolin	22	-0.141224	-0.812877	0.706439	0.778142
BRENTANI_TRANSCRIPTION_FACTORS	Forskolin	46	-0.0999881	-0.812085	0.66736	0.778173
SMOOTH_MUSCLE_CONTRACTION	Forskolin	102	-0.0685044	-0.811734	0.696607	0.777499
HSA00380_TRYPTOPHAN_METABOLISM	Forskolin	43	-0.106001	-0.809489	0.675299	0.779768
BRCA2_BRCA1_DN	Forskolin	28	-0.128975	-0.808078	0.711198	0.780779
HSA04810_REGULATION_OF_ACTIN_CYTOSKELETON	Forskolin	147	-0.0573216	-0.805695	0.73	0.783275
SIG_REGULATION_OF_THE_ACTIN_CYTOSKELETON_BY_RHO_GTPASES	Forskolin	26	-0.132034	-0.80415	0.718504	0.784447
PASSERINI_ADHESION	Forskolin	26	-0.134578	-0.803828	0.728516	0.783665
DOX_RESIST_GASTRIC_UP	Forskolin	28	-0.128898	-0.801689	0.706264	0.785632
PASSERINI_INFLAMMATION	Forskolin	15	-0.170284	-0.796735	0.724846	0.792132
CMV_HCMV_TIMECOURSE_48HRS_UP	Forskolin	45	-0.102508	-0.795193	0.732252	0.793209
ZHAN_MM_MOLECULAR_CLASSI_UP	Forskolin	38	-0.110326	-0.794907	0.7251	0.792373
P53_BRCA1_UP	Forskolin	19	-0.150986	-0.794697	0.730769	0.791447
ZHAN_MM_CD1_VS_CD2_UP	Forskolin	64	-0.0821653	-0.791546	0.710794	0.794997
CELL_CYCLE_REGULATOR	Forskolin	15	-0.173734	-0.790251	0.704724	0.795661
TAVOR_CEBP_UP	Forskolin	37	-0.108572	-0.789252	0.73	0.795946
HBX_NL_UP	Forskolin	15	-0.166638	-0.787136	0.722917	0.797752
IFN_BETA_GLIOMA_DN	Forskolin	31	-0.119602	-0.786304	0.729783	0.797722
FSH_OVARY_MCV152_UP	Forskolin	38	-0.106608	-0.78465	0.743802	0.798906
HSA05040_HUNTINGTONS_DISEASE	Forskolin	22	-0.139666	-0.783653	0.742004	0.799175
PDGF_ES_UP	Forskolin	16	-0.160544	-0.781406	0.742366	0.801312
HSC_HSC_FETAL	Forskolin	154	-0.0538214	-0.776589	0.769547	0.807396
POD1_KO_MOST_DN	Forskolin	19	-0.148186	-0.774131	0.726891	0.809799
HSA01030_GLYCAN_STRUCTURES_BIOSYNTHESIS_1	Forskolin	86	-0.0713783	-0.771915	0.738372	0.811738
TAKEDA_NUP8_HOXA9_3D_UP	Forskolin	104	-0.0650202	-0.771444	0.730159	0.811184
DAC_PANC50_UP	Forskolin	24	-0.13288	-0.767805	0.743802	0.814996
SHIPP_FL_VS_DLBCL_UP	Forskolin	20	-0.142955	-0.76648	0.74187	0.815747
CMV_HCMV_TIMECOURSE_14HRS_DN	Forskolin	36	-0.106633	-0.765745	0.746421	0.815567
GO_ROS	Forskolin	18	-0.148999	-0.762839	0.75717	0.81857
BREAST_DUCTAL_CARCINOMA_GENES	Forskolin	15	-0.164473	-0.757059	0.765385	0.825493
SPRYPATHWAY	Forskolin	16	-0.157816	-0.754657	0.771489	0.827743
RADMACHER_AMLNORMALKARYTYPE_SIG	Forskolin	47	-0.0944974	-0.751577	0.785714	0.830908
PASSERINI_IMMUNE	Forskolin	19	-0.143997	-0.751313	0.781633	0.830063
PHOSPHATIDYLINOSITOL_SIGNALING_SYSTEM	Forskolin	62	-0.0822761	-0.748162	0.784679	0.833197
WELCH_GATA1	Forskolin	16	-0.152046	-0.747239	0.773279	0.833263
GH_EXOGENOUS_ANY_DN	Forskolin	60	-0.0823542	-0.743346	0.767442	0.837275
ZUCCHI_EPITHELIAL_DN	Forskolin	25	-0.122421	-0.74129	0.805882	0.838759
BRENTANI_DNA_METHYLATION_AND_MODIFICATION	Forskolin	17	-0.155045	-0.737491	0.793617	0.842554
TPOPATHWAY	Forskolin	16	-0.151925	-0.734739	0.784836	0.845027
NFATPATHWAY	Forskolin	40	-0.100086	-0.732557	0.816901	0.846767
UVC_HIGH_D5_DN	Forskolin	25	-0.126584	-0.729573	0.791748	0.849555
IL1_CORNEA_UP	Forskolin	44	-0.0906855	-0.724446	0.790021	0.855098
HSA04930_TYPE_II_DIABETES_MELLITUS	Forskolin	35	-0.101583	-0.720271	0.804688	0.859378
KANNAN_P53_UP	Forskolin	20	-0.136933	-0.719823	0.821359	0.858656
G_PROTEIN_SIGNALING	Forskolin	57	-0.0816048	-0.715302	0.822736	0.863202
MCALPAINPATHWAY	Forskolin	19	-0.139133	-0.712461	0.832016	0.865545
ST_WNT_BETA_CATENIN_PATHWAY	Forskolin	25	-0.120703	-0.710316	0.862934	0.867025
HDACI_COLON_BUT2HRS_UP	Forskolin	41	-0.0920896	-0.701789	0.862786	0.876491
ELECTRON_TRANSPORT	Forskolin	32	-0.102424	-0.697445	0.847059	0.880601
CORDERO_KRAS_KD_VS_CONTROL_DN	Forskolin	35	-0.0967721	-0.688047	0.863248	0.89044
GREENBAUM_E2A_UP	Forskolin	26	-0.111768	-0.681866	0.870902	0.896494
HSA01510_NEURODEGENERATIVE_DISEASES	Forskolin	32	-0.0988944	-0.676436	0.87619	0.901394
POMEROY_DESMOPLASIC_VS_CLASSIC_MD_DN	Forskolin	21	-0.125286	-0.673299	0.865079	0.903418
CARIES_PULP_UP	Forskolin	117	-0.052138	-0.667417	0.885149	0.908569
NOUZOVA_CPG_METHLTD	Forskolin	40	-0.0878904	-0.657315	0.897119	0.918187
ZHAN_MULTIPLE_MYELOMA_VS_NORMAL_DN	Forskolin	20	-0.122381	-0.655942	0.900398	0.918234
HOGERKORP_CD44_DN	Forskolin	15	-0.138508	-0.650874	0.928713	0.921995
LIAN_MYELOID_DIFF_RECEPTORS	Forskolin	18	-0.125692	-0.64992	0.897233	0.921619
AGED_MOUSE_HIPPOCAMPUS_ANY_UP	Forskolin	31	-0.0953854	-0.648723	0.904	0.921491
HOFMANN_MANTEL_LYMPHOMA_VS_LYMPH_NODES_DN	Forskolin	23	-0.112743	-0.646369	0.907115	0.922377
TPA_SKIN_UP	Forskolin	16	-0.130743	-0.623364	0.902893	0.942298
FALT_BCLL_UP	Forskolin	27	-0.102258	-0.612762	0.92449	0.949856
SHEPARD_CRASH_AND_BURN_MUT_VS_WT_DN	Forskolin	108	-0.0512222	-0.612514	0.919679	0.948685
POMEROY_DESMOPLASIC_VS_CLASSIC_MD_UP	Forskolin	32	-0.0898143	-0.608774	0.947471	0.950333
UVB_NHEK1_DN	Forskolin	189	-0.0374422	-0.607239	0.953578	0.950164
MATRIX_METALLOPROTEINASES	Forskolin	16	-0.128548	-0.604793	0.92607	0.950625
TAKEDA_NUP8_HOXA9_3D_DN	Forskolin	15	-0.125851	-0.602372	0.943798	0.95113
AGED_MOUSE_MUSCLE_DN	Forskolin	17	-0.122572	-0.601359	0.947955	0.95049
GLYCOGEN_METABOLISM	Forskolin	25	-0.0967953	-0.589593	0.952286	0.957621
ADDYA_K562_HEMIN_TREATMENT	Forskolin	44	-0.075991	-0.589261	0.950096	0.956478
IL6PATHWAY	Forskolin	17	-0.118402	-0.577908	0.957576	0.962663
TPA_SENS_MIDDLE_DN	Forskolin	202	-0.0338594	-0.561133	0.974257	0.970559
HSA05010_ALZHEIMERS_DISEASE	Forskolin	23	-0.0980319	-0.560273	0.950108	0.969528
KLEIN_PEL_UP	Forskolin	34	-0.0795002	-0.550458	0.966203	0.972836
NF90_DN	Forskolin	26	-0.0834588	-0.521324	0.989775	0.982913
