# Supplementary material for: Gene Expression Analysis of Forskolin Treated Basilar Papillae Identifies MicroRNA181a as a Mediator of Proliferation
Source: PLoS One. 2010 Jul 9;5(7):e11502. doi: 10.1371/journal.pone.0011502 (PMC2901389; doi:10.1371/journal.pone.0011502)
Supplement: Table S5 — Gene set enrichment analysis statistics. Curated gene sets enriched in the control and forskolin samples after 48 hours. (0.25 MB XLS) [file pone.0011502.s005.xls]

## Sheet: Sheet1
Gene Set Name	Enriched in Control/Forskolin?	Gene Set Size	Enrichment Score	Normalized Enrichment Score	P-Value	False Discovery Rate (Q-Value)
HSA03010_RIBOSOME	Control	46	0.667542	5.40432	0	0
RIBOSOMAL_PROTEINS	Control	67	0.542329	5.17017	0	0
HSA00190_OXIDATIVE_PHOSPHORYLATION	Control	75	0.421905	4.28737	0	0
ELECTRON_TRANSPORT_CHAIN	Control	69	0.405993	4.00312	0	0
MOOTHA_VOXPHOS	Control	53	0.447249	3.80093	0	0
HUMAN_MITODB_6_2002	Control	268	0.193989	3.73578	0	0
HSA04080_NEUROACTIVE_LIGAND_RECEPTOR_INTERACTION	Control	190	0.224601	3.59797	0	0
MITOCHONDRIA	Control	277	0.189705	3.59316	0	0
UVB_NHEK2_UP	Control	33	0.437641	2.99859	0	7.37e-05
GPCRDB_CLASS_A_RHODOPSIN_LIKE	Control	113	0.242759	2.94536	0.00195312	0.000206
CREB_BRAIN_8WKS_UP	Control	55	0.313704	2.74994	0	0.00121108
INNEREAR_UP	Control	26	0.435111	2.69787	0	0.00157171
PASSERINI_EM	Control	30	0.402571	2.61395	0	0.00285432
DFOSB_BRAIN_2WKS_UP	Control	31	0.386643	2.60048	0	0.0029008
TARTE_MATURE_PC	Control	221	0.151337	2.54441	0	0.00377502
HYPOPHYSECTOMY_RAT_UP	Control	21	0.464673	2.52286	0	0.00401243
HSA04640_HEMATOPOIETIC_CELL_LINEAGE	Control	44	0.320764	2.51469	0	0.00402747
GPCRS_CLASS_A_RHODOPSIN_LIKE	Control	93	0.223681	2.50102	0	0.00422755
BOQUEST_CD31PLUS_VS_CD31MINUS_DN	Control	186	0.154194	2.44301	0	0.00572449
HIPPOCAMPUS_DEVELOPMENT_POSTNATAL	Control	30	0.367167	2.41862	0	0.00652629
HDACI_COLON_SUL48HRS_DN	Control	61	0.261104	2.41236	0	0.00668107
AGEING_KIDNEY_SPECIFIC_UP	Control	128	0.179343	2.38794	0	0.00761948
ADIP_HUMAN_DN	Control	19	0.457813	2.37643	0	0.00794724
OXIDATIVE_PHOSPHORYLATION	Control	40	0.311542	2.33127	0	0.010646
FLECHNER_KIDNEY_TRANSPLANT_REJECTION_DN	Control	380	0.103532	2.32578	0.00204082	0.0106952
MATSUDA_VALPHAINKT_DIFF	Control	280	0.119747	2.30364	0	0.0120377
POD1_KO_MOST_UP	Control	25	0.390942	2.301	0.00193798	0.011722
HOHENKIRK_MONOCYTE_DEND_UP	Control	72	0.230032	2.29285	0	0.0119271
CROONQUIST_IL6_STROMA_UP	Control	27	0.367621	2.26144	0.00194932	0.0145151
HSA04610_COMPLEMENT_AND_COAGULATION_CASCADES	Control	52	0.263103	2.24569	0.00194175	0.0155244
DORSEY_DOXYCYCLINE_UP	Control	23	0.384766	2.24087	0.00205339	0.0155387
NING_COPD_UP	Control	95	0.198297	2.23653	0	0.0154686
HYPOXIA_RCC_UP	Control	55	0.247171	2.22865	0	0.015942
GNATENKO_PLATELET_UP	Control	25	0.371126	2.22592	0.00199601	0.0158218
ESR_FIBROBLAST_UP	Control	36	0.304963	2.21213	0.00204918	0.017281
SCHRAETS_MLL_UP	Control	25	0.361871	2.19549	0	0.0190278
MONOAMINE_GPCRS	Control	26	0.353548	2.18997	0	0.019158
VEGF_MMMEC_ALL_UP	Control	64	0.22914	2.16704	0.00596422	0.0214557
STEMCELL_COMMON_DN	Control	39	0.293876	2.16168	0	0.0215332
IDX_TSA_UP_CLUSTER6	Control	122	0.168484	2.14495	0.00943396	0.0235564
GNATENKO_PLATELET	Control	25	0.371126	2.13831	0.00420168	0.0241044
ZHAN_MM_CD138_LB_VS_REST	Control	18	0.417828	2.11116	0	0.027666
JNK_DN	Control	23	0.373756	2.11106	0.00203252	0.0270387
HDACI_COLON_SUL24HRS_DN	Control	90	0.186148	2.07641	0.00203252	0.0327987
IGLESIAS_E2FMINUS_UP	Control	103	0.176349	2.06118	0.00196464	0.0349578
ABRAHAM_AL_VS_MM_UP	Control	18	0.393393	2.04859	0.00392157	0.0366923
GILDEA_BLADDER_UP	Control	18	0.391219	2.04477	0.00998004	0.0370722
BYSTRYKH_HSC_CIS_GLOCUS	Control	76	0.201286	2.02248	0.00410678	0.0410941
NADLER_OBESITY_UP	Control	27	0.332887	2.01969	0.00804829	0.0407683
SCHURINGA_STAT5A_UP	Control	15	0.425798	2.01934	0.00580271	0.0400646
HSA04512_ECM_RECEPTOR_INTERACTION	Control	68	0.206926	2.00865	0.00210526	0.0415378
STRIATED_MUSCLE_CONTRACTION	Control	26	0.327669	1.98972	0.00202429	0.0455412
ABRAHAM_MM_VS_AL_DN	Control	18	0.393393	1.98657	0.004	0.0455544
YAO_P4_KO_VS_WT_UP	Control	46	0.242864	1.98485	0.00399202	0.0451018
LI_FETAL_VS_WT_KIDNEY_UP	Control	135	0.138888	1.92096	0.00579151	0.0643038
VEGF_MMMEC_12HRS_UP	Control	22	0.333704	1.91487	0.0114068	0.0654957
ADIPOGENESIS_HMSC_CLASS8_DN	Control	27	0.317658	1.91273	0.0170213	0.0652066
CROONQUIST_RAS_STROMA_DN	Control	17	0.373498	1.89984	0.0163599	0.0688681
RORIE_ES_PNET_UP	Control	16	0.382853	1.87985	0.0102669	0.0755374
BOQUEST_CD31PLUS_VS_CD31MINUS_UP	Control	429	0.0790142	1.87393	0.00614754	0.0768894
IDX_TSA_DN_CLUSTER2	Control	42	0.24456	1.86956	0.00775194	0.0773482
WANG_HOXA9_VS_MEIS1_DN	Control	16	0.386666	1.86744	0.00811359	0.0770456
PEPTIDE_GPCRS	Control	49	0.226532	1.86076	0.0136986	0.0784059
GPCRDB_OTHER	Control	30	0.278786	1.82928	0.00787402	0.0920268
AGED_MOUSE_HYPOTH_UP	Control	32	0.269429	1.82018	0.0181818	0.0948991
LE_MYELIN_DN	Control	71	0.182498	1.81735	0.0182186	0.094874
ET743_SARCOMA_72HRS_UP	Control	44	0.230281	1.81121	0.0162272	0.0965033
AGEING_KIDNEY_UP	Control	232	0.101431	1.80207	0.0140845	0.0997018
ZHAN_MULTIPLE_MYELOMA_VS_NORMAL_DN	Control	20	0.335861	1.79599	0.0133333	0.10123
INFLAMMATORY_RESPONSE_PATHWAY	Control	23	0.299122	1.73825	0.0308008	0.13452
PARK_MSCS_BOTH	Control	29	0.268084	1.73342	0.0217391	0.1359
HSIAO_LIVER_SPECIFIC_GENES	Control	157	0.11997	1.73036	0.0204499	0.136092
IRS1_KO_ADIP_DN	Control	88	0.153341	1.69237	0.026749	0.162495
HYPOXIA_REVIEW	Control	58	0.187698	1.67274	0.0293501	0.177093
BAF57_BT549_UP	Control	166	0.111772	1.67151	0.0219561	0.175635
ADIP_DIFF_CLUSTER1	Control	41	0.222763	1.67135	0.029703	0.173417
FETAL_LIVER_VS_ADULT_LIVER_GNF2	Control	35	0.233754	1.66815	0.0402414	0.174031
SANA_TNFA_ENDOTHELIAL_DN	Control	58	0.183411	1.66783	0.035343	0.172043
HSA04514_CELL_ADHESION_MOLECULES	Control	71	0.167934	1.64805	0.032882	0.187264
EMT_UP	Control	36	0.225297	1.64102	0.0346821	0.191063
ELECTRON_TRANSPORTER_ACTIVITY	Control	69	0.166285	1.63887	0.0342052	0.190589
ET743_SARCOMA_UP	Control	44	0.207482	1.62328	0.0410156	0.202674
BRG1_ALAB_DN	Control	29	0.259581	1.62231	0.0489796	0.20101
CROMER_HYPOPHARYNGEAL_MET_VS_NON_DN	Control	49	0.194136	1.61564	0.0471092	0.205312
LEE_MYC_UP	Control	38	0.215884	1.61485	0.0331492	0.203742
CMV_HCMV_TIMECOURSE_24HRS_DN	Control	29	0.241216	1.60831	0.0221328	0.207826
KANG_TERT_UP	Control	59	0.179045	1.6063	0.0397614	0.207436
GH_EXOGENOUS_LATE_UP	Control	40	0.212618	1.60273	0.0386847	0.20831
SANA_IFNG_ENDOTHELIAL_DN	Control	58	0.179888	1.60018	0.0451866	0.208344
ROSS_MLL_FUSION	Control	43	0.20762	1.59532	0.0507812	0.210794
AGED_MOUSE_CEREBELLUM_DN	Control	35	0.231918	1.59517	0.0443975	0.208669
HSA00710_CARBON_FIXATION	Control	15	0.340396	1.5893	0.0523256	0.212272
PLATELET_EXPRESSED	Control	20	0.300893	1.58725	0.0473251	0.212038
MYOD_BRG1_UP	Control	23	0.269541	1.58428	0.0410156	0.212898
TSA_PANC50_UP	Control	26	0.252973	1.58072	0.0480962	0.213978
CMV_HCMV_TIMECOURSE_ALL_DN	Control	284	0.0814023	1.57783	0.0502901	0.214598
TAKEDA_NUP8_HOXA9_8D_UP	Control	86	0.147805	1.57726	0.0581162	0.212949
CARBON_FIXATION	Control	15	0.340396	1.57584	0.0471513	0.212302
H2O2_CSBDIFF_C2	Control	21	0.289419	1.57458	0.0509165	0.211332
VEGF_MMMEC_6HRS_UP	Control	41	0.204354	1.57383	0.0536779	0.209883
POD1_KO_UP	Control	257	0.0844648	1.56837	0.0610526	0.213314
HSA04060_CYTOKINE_CYTOKINE_RECEPTOR_INTERACTION	Control	130	0.121647	1.56315	0.0638298	0.216134
TAKEDA_NUP8_HOXA9_10D_DN	Control	82	0.144843	1.55655	0.0614754	0.220277
VERHAAK_AML_NPM1_MUT_VS_WT_UP	Control	103	0.130374	1.54845	0.0532544	0.226531
GH_EXOGENOUS_ANY_UP	Control	149	0.109632	1.5429	0.0547945	0.230023
ROS_MOUSE_AORTA_DN	Control	50	0.184485	1.54233	0.0560928	0.228347
GUO_HEX_DN	Control	42	0.201419	1.54194	0.0640777	0.226575
CMV_24HRS_DN	Control	48	0.190282	1.54127	0.0582524	0.225167
ROS_MOUSE_AORTA_UP	Control	18	0.30306	1.52005	0.0595483	0.246238
TAKEDA_NUP8_HOXA9_16D_UP	Control	94	0.131834	1.51551	0.0678643	0.249108
NAKAJIMA_MCS_UP	Control	54	0.172674	1.51534	0.0726257	0.247014
HIPPOCAMPUS_DEVELOPMENT_PRENATAL	Control	20	0.280168	1.51327	0.0545455	0.247188
NOVA2_KO_SPLICING	Control	33	0.226253	1.51116	0.0712871	0.247412
STOSSI_ER_UP	Control	30	0.233943	1.50947	0.0590551	0.247151
IRITANI_ADPROX_LYMPH	Control	92	0.132221	1.49209	0.0748031	0.264412
PASSERINI_ADHESION	Control	26	0.249444	1.49161	0.0687623	0.262719
BRCA_ER_POS	Control	351	0.0692593	1.48822	0.0687623	0.264622
HYPOXIA_REG_UP	Control	25	0.254133	1.48655	0.0606061	0.264294
FLOTHO_CASP8AP2_MRD_DIFF	Control	49	0.177967	1.48626	0.0686275	0.262376
FRASOR_ER_DN	Control	43	0.191097	1.48508	0.0571429	0.261501
DORSAM_HOXA9_DN	Control	23	0.257019	1.47906	0.0752688	0.266156
GALINDO_ACT_UP	Control	48	0.181588	1.47165	0.0703934	0.272549
JISON_SICKLE_CELL	Control	21	0.271011	1.4691	0.0852878	0.273221
BRCA_BRCA1_NEG	Control	107	0.123346	1.46616	0.0758197	0.274366
CELL_SURFACE_RECEPTOR_LINKED_SIGNAL_TRANSDUCTION	Control	73	0.146255	1.46411	0.0779727	0.27491
BASSO_HCL_DIFF	Control	56	0.164637	1.46407	0.0712788	0.27275
MATRIX_METALLOPROTEINASES	Control	16	0.300861	1.46073	0.0666667	0.274763
BCNU_GLIOMA_NOMGMT_48HRS_DN	Control	17	0.288349	1.45612	0.079918	0.278147
JECHLINGER_EMT_UP	Control	31	0.22342	1.45543	0.0883534	0.276874
DAC_PANC_UP	Control	209	0.0854761	1.45513	0.0847784	0.275102
HSA04020_CALCIUM_SIGNALING_PATHWAY	Control	127	0.110661	1.45364	0.0819672	0.274544
JISON_SICKLECELL_DIFF	Control	212	0.0857088	1.44919	0.0859539	0.277523
AGED_MOUSE_MUSCLE_DN	Control	17	0.297495	1.44585	0.0942623	0.27943
GAY_YY1_UP	Control	143	0.104816	1.43617	0.0894632	0.288872
SANSOM_APC_4_DN	Control	48	0.175595	1.43287	0.0767754	0.290828
P53_BRCA1_UP	Control	19	0.277693	1.43283	0.0956175	0.28872
NELSON_ANDROGEN_UP	Control	46	0.182505	1.42732	0.0917782	0.293536
TGFBETA_EARLY_UP	Control	36	0.197884	1.42559	0.0796117	0.293663
WELCH_GATA1	Control	16	0.292891	1.41989	0.104628	0.298536
HSA01430_CELL_COMMUNICATION	Control	72	0.140809	1.41904	0.0912477	0.297451
VANTVEER_BREAST_OUTCOME_GOOD_VS_POOR_UP	Control	17	0.294143	1.41817	0.132411	0.296317
TSA_HEPATOMA_CANCER_UP	Control	25	0.241676	1.41729	0.105163	0.295305
HUMAN_TISSUE_PANCREAS	Control	23	0.23909	1.39746	0.125749	0.318457
SERUM_FIBROBLAST_CORE_DN	Control	127	0.103242	1.38673	0.0950495	0.330576
HOGERKORP_ANTI_CD44_UP	Control	17	0.269926	1.3696	0.116371	0.352513
HYPOPHYSECTOMY_RAT_DN	Control	35	0.193429	1.36521	0.124074	0.35644
VERHAAK_AML_NPM1_MUT_VS_WT_DN	Control	158	0.0937295	1.35921	0.121387	0.362747
FERRANDO_MLL_T_ALL_UP	Control	52	0.157478	1.35743	0.126733	0.362909
IGF_VS_PDGF_UP	Control	50	0.161709	1.35561	0.147117	0.363077
CMV_ALL_DN	Control	72	0.136197	1.35463	0.128834	0.362125
HOGERKORP_CD44_UP	Control	16	0.282946	1.35401	0.132937	0.360585
CHANG_SERUM_RESPONSE_DN	Control	84	0.125598	1.35083	0.150628	0.362626
LIAN_MYELOID_DIFF_GRANULE	Control	16	0.275424	1.34675	0.120594	0.366131
BREAST_CANCER_ESTROGEN_SIGNALING	Control	66	0.143705	1.34595	0.144374	0.364931
INTRINSICPATHWAY	Control	19	0.253132	1.34483	0.128257	0.36412
CALRES_RHESUS_UP	Control	46	0.173073	1.34438	0.132554	0.362429
IDX_TSA_UP_CLUSTER1	Control	15	0.295217	1.34428	0.166667	0.360219
ZUCCHI_EPITHELIAL_UP	Control	29	0.208059	1.34424	0.156057	0.358019
TAVOR_CEBP_UP	Control	37	0.18351	1.34415	0.131737	0.355896
HSC_INTERMEDIATEPROGENITORS_FETAL	Control	98	0.11581	1.33994	0.130081	0.359688
HSC_INTERMEDIATEPROGENITORS_SHARED	Control	82	0.123481	1.33714	0.157143	0.361256
METASTASIS_ADENOCARC_DN	Control	20	0.248932	1.33517	0.127953	0.361981
AGUIRRE_PANCREAS_CHR1	Control	21	0.234838	1.31609	0.159274	0.38763
PURINE_METABOLISM	Control	78	0.125499	1.31236	0.149805	0.39101
IL12PATHWAY	Control	15	0.282583	1.31218	0.141414	0.388945
CELL_ADHESION_RECEPTOR_ACTIVITY	Control	21	0.243685	1.31193	0.169661	0.386966
UVB_NHEK3_C8	Control	56	0.148463	1.31062	0.154618	0.386738
XPB_TTD-CS_DN	Control	18	0.259322	1.31054	0.131737	0.384527
IDX_TSA_UP_CLUSTER4	Control	31	0.196662	1.30866	0.167006	0.385078
HSA03020_RNA_POLYMERASE	Control	17	0.270344	1.30825	0.168467	0.383471
FRASOR_ER_UP	Control	24	0.222435	1.30824	0.155462	0.381262
SANSOM_APC_5_DN	Control	212	0.0801252	1.30513	0.164356	0.383695
AGED_RHESUS_DN	Control	83	0.123926	1.30413	0.17284	0.382929
GERY_CEBP_TARGETS	Control	78	0.124723	1.30382	0.146881	0.381154
ET743_RESIST_DN	Control	29	0.207	1.30315	0.145161	0.379889
HDACI_COLON_SUL16HRS_DN	Control	49	0.157406	1.29843	0.158103	0.38447
ROSS_CBF	Control	49	0.159932	1.29654	0.185859	0.385
AGED_MOUSE_RETINA_ANY_UP	Control	17	0.260966	1.29567	0.158879	0.383959
HOUSTIS_ROS	Control	18	0.251818	1.2933	0.176471	0.38528
PASSERINI_GROWTH	Control	30	0.195602	1.29128	0.172676	0.386115
UVB_NHEK1_UP	Control	89	0.116999	1.28642	0.17759	0.390694
WALLACE_JAK2_DIFF	Control	17	0.260093	1.2822	0.176715	0.394677
LEE_ACOX1_UP	Control	42	0.165526	1.28042	0.202756	0.395169
ZUCCHI_EPITHELIAL_DN	Control	25	0.210954	1.28029	0.156	0.393211
BRENTANI_DNA_METHYLATION_AND_MODIFICATION	Control	17	0.257812	1.2792	0.167665	0.392659
CORDERO_KRAS_KD_VS_CONTROL_UP	Control	53	0.150457	1.27547	0.173996	0.395706
HUMAN_TISSUE_LIVER	Control	15	0.270848	1.26952	0.175889	0.402462
NING_COPD_DN	Control	66	0.131162	1.26445	0.176923	0.407835
PARP_KO_UP	Control	25	0.210882	1.26325	0.184486	0.40742
AGUIRRE_PANCREAS_CHR17	Control	42	0.16027	1.25502	0.206827	0.417858
HTERT_DN	Control	54	0.143326	1.25214	0.187008	0.420277
VEGF_MMMEC_3HRS_UP	Control	41	0.165724	1.24383	0.19917	0.430842
CMV_HCMV_TIMECOURSE_20HRS_DN	Control	25	0.204998	1.24078	0.177515	0.433453
STAEGE_EFTS_UP	Control	19	0.240959	1.24056	0.200431	0.431587
RIBAVIRIN_RSV_DN	Control	31	0.188037	1.23862	0.205534	0.432492
MANALO_HYPOXIA_UP	Control	71	0.124916	1.23852	0.189899	0.43045
HSA00632_BENZOATE_DEGRADATION_VIA_COA_LIGATION	Control	22	0.220995	1.23615	0.19798	0.432083
ASTON_DEPRESSION_DN	Control	94	0.108266	1.23431	0.199612	0.432741
HEMATOP_STEM_ALL_UP	Control	18	0.240184	1.23306	0.190926	0.432482
BRUNO_IL3_DN	Control	49	0.152077	1.23115	0.199609	0.433263
4NQO_ESR_WS_UNREG	Control	24	0.212481	1.22965	0.218107	0.433488
CMV_HCMV_TIMECOURSE_4HRS_DN	Control	21	0.222498	1.22939	0.21328	0.431795
IGF1_NIH3T3_UP	Control	24	0.210605	1.22824	0.218487	0.431451
GENOTOXINS_4HRS_DISCR	Control	21	0.217564	1.22462	0.221258	0.434937
YANG_OSTECLASTS_SIG	Control	16	0.253243	1.22412	0.236253	0.433599
BRG1_ALAB_UP	Control	29	0.188903	1.2231	0.227099	0.433065
KANG_TERT_DN	Control	75	0.119105	1.22136	0.217842	0.433685
BRCA_PROGNOSIS_POS	Control	29	0.189252	1.21278	0.232877	0.445022
WERNERONLY_FIBRO_UP	Control	23	0.212178	1.21111	0.231388	0.445584
GPCRDB_CLASS_B_SECRETIN_LIKE	Control	15	0.255079	1.2102	0.209524	0.44488
BCRABL_HL60_CDNA_DN	Control	19	0.229069	1.20861	0.216216	0.445405
HDACI_COLON_BUT16HRS_UP	Control	26	0.198016	1.20835	0.239437	0.44372
AGED_MOUSE_HIPPOCAMPUS_ANY_DN	Control	35	0.166585	1.20717	0.232179	0.443434
H2O2_CSBRESCUED_UP	Control	36	0.164565	1.20691	0.227181	0.441713
ADIP_VS_PREADIP_UP	Control	25	0.205388	1.20629	0.218876	0.440507
WERNER_FIBRO_UP	Control	39	0.162114	1.20527	0.216667	0.440016
GPCRS_CLASS_B_SECRETIN_LIKE	Control	15	0.255079	1.20456	0.239845	0.439082
CORDERO_KRAS_KD_VS_CONTROL_DN	Control	35	0.164312	1.20394	0.233405	0.438015
HSA03320_PPAR_SIGNALING_PATHWAY	Control	51	0.13987	1.19563	0.231405	0.449222
IFN_BETA_GLIOMA_DN	Control	31	0.179218	1.19158	0.221545	0.453518
UVC_TTD_4HR_UP	Control	30	0.181495	1.1914	0.241245	0.451753
BRENTANI_IMMUNE_FUNCTION	Control	25	0.195757	1.18991	0.225873	0.452172
EMT_DN	Control	38	0.162703	1.18748	0.241176	0.45411
KANNAN_P53_UP	Control	20	0.217713	1.17735	0.253138	0.468576
CELL_ADHESION_MOLECULE_ACTIVITY	Control	62	0.124138	1.17648	0.262397	0.467831
ADIPOGENESIS_HMSC_CLASS3_UP	Control	47	0.150209	1.17278	0.243564	0.4718
KUMAR_HOXA_DIFF	Control	225	0.0663387	1.16558	0.24498	0.481234
TPA_RESIST_LATE_DN	Control	49	0.138926	1.1647	0.257796	0.480565
BCNU_GLIOMA_MGMT_24HRS_DN	Control	15	0.247434	1.16451	0.262846	0.478785
CSKPATHWAY	Control	15	0.250239	1.16317	0.259109	0.478761
AMIPATHWAY	Control	15	0.250239	1.16104	0.269388	0.480101
MENSE_HYPOXIA_UP	Control	67	0.122115	1.15891	0.277559	0.481302
NI2_MOUSE_UP	Control	30	0.176454	1.14888	0.264766	0.495629
HSA00020_CITRATE_CYCLE	Control	18	0.224138	1.14624	0.292929	0.498099
NAKAJIMA_MCSMBP_MAST	Control	31	0.176616	1.14372	0.254658	0.500041
HSA00271_METHIONINE_METABOLISM	Control	16	0.235709	1.14129	0.283644	0.501947
TAKEDA_NUP8_HOXA9_10D_UP	Control	108	0.0932587	1.13544	0.296451	0.50988
LIAN_MYELOID_DIFF_RECEPTORS	Control	18	0.220848	1.13531	0.285714	0.507957
GO_ROS	Control	18	0.221525	1.13386	0.279022	0.508315
ABBUD_LIF_DN	Control	16	0.227475	1.11431	0.303644	0.53981
MOREAUX_TACI_HI_VS_LOW_UP	Control	226	0.0619875	1.11206	0.30297	0.541514
ADIP_VS_FIBRO_UP	Control	24	0.187008	1.10891	0.320329	0.544706
GH_EXOGENOUS_ALL_UP	Control	35	0.158232	1.10675	0.321773	0.545983
LIN_WNT_UP	Control	27	0.177823	1.10587	0.323108	0.545334
HCC_SURVIVAL_GOOD_VS_POOR_UP	Control	73	0.107759	1.10533	0.308911	0.544047
ZELLER_MYC_UP	Control	20	0.203377	1.10311	0.339181	0.545874
LAL_KO_3MO_UP	Control	25	0.183345	1.10249	0.32839	0.54476
IL1_CORNEA_DN	Control	48	0.133175	1.10185	0.32681	0.543658
WANG_MLL_CBP_VS_GMP_UP	Control	27	0.181567	1.09731	0.32582	0.549307
PASSERINI_IMMUNE	Control	19	0.211428	1.09494	0.321138	0.551158
HSA00480_GLUTATHIONE_METABOLISM	Control	18	0.213169	1.09406	0.355865	0.550457
IRS_KO_ADIP_UP	Control	18	0.216264	1.09345	0.333955	0.549259
LEE_DENA_DN	Control	49	0.131995	1.09297	0.324165	0.547887
CHEN_HOXA5_TARGETS_DN	Control	19	0.208741	1.08831	0.335953	0.553955
JECHLINGER_EMT_DN	Control	29	0.171595	1.0875	0.346979	0.553233
AGED_MOUSE_NEOCORTEX_DN	Control	33	0.153788	1.08372	0.325397	0.557804
CMV_HCMV_TIMECOURSE_12HRS_UP	Control	17	0.218954	1.0816	0.334677	0.559275
NADLER_OBESITY_DN	Control	23	0.191864	1.07905	0.330097	0.56131
KLEIN_PEL_DN	Control	29	0.165828	1.07853	0.362319	0.560034
BYSTRYKH_HSC_BRAIN_CIS_GLOCUS	Control	33	0.157485	1.07463	0.348837	0.564659
LEE_E2F1_DN	Control	45	0.136669	1.07176	0.32567	0.567591
HSA04612_ANTIGEN_PROCESSING_AND_PRESENTATION	Control	21	0.194697	1.07127	0.339048	0.566279
LEE_E2F1_UP	Control	40	0.141003	1.07031	0.378099	0.565886
LEE_DENA_UP	Control	44	0.13969	1.06992	0.363095	0.564421
CARIES_PULP_UP	Control	117	0.084463	1.06784	0.376258	0.565786
HDACI_COLON_TSA_UP	Control	75	0.105704	1.06781	0.35167	0.56373
HIF1_TARGETS	Control	26	0.170239	1.06758	0.359551	0.562049
HDACI_COLON_TSA48HRS_UP	Control	28	0.166985	1.06363	0.356736	0.566949
LEE_ACOX1_DN	Control	48	0.13031	1.06321	0.344488	0.565582
TGFBETA_ALL_UP	Control	64	0.11253	1.06225	0.356275	0.565063
MYC_TARGETS	Control	35	0.148704	1.06023	0.360887	0.566515
IL1_CORNEA_UP	Control	44	0.133775	1.05997	0.356998	0.564901
WONG_IFNA_HCC_RESISTANT_VS_SENSITIVE_DN	Control	23	0.18631	1.05075	0.397313	0.579256
UVC_LOW_C2_DN	Control	15	0.222582	1.0486	0.364008	0.581001
GLYCINE_SERINE_AND_THREONINE_METABOLISM	Control	24	0.178551	1.04805	0.386774	0.579801
HSA00010_GLYCOLYSIS_AND_GLUCONEOGENESIS	Control	38	0.139625	1.04168	0.374	0.588558
GOLDRATH_MEMORY	Control	43	0.130908	1.03236	0.39666	0.60304
ABBUD_LIF_UP	Control	31	0.160124	1.03034	0.403922	0.604433
IL6_FIBRO_UP	Control	27	0.164015	1.02531	0.415254	0.611215
ZHAN_MM_CD138_MS_VS_REST	Control	32	0.156595	1.02519	0.405303	0.609275
CREB_BRAIN_8WKS_DN	Control	31	0.162533	1.02445	0.412574	0.608458
H2O2_CSBRESCUED_C1_UP	Control	28	0.158935	1.02437	0.411765	0.606471
CMV_HCMV_TIMECOURSE_14HRS_DN	Control	36	0.142097	1.02368	0.425403	0.605528
SMOOTH_MUSCLE_CONTRACTION	Control	102	0.0865743	1.02264	0.432377	0.605224
HSA04510_FOCAL_ADHESION	Control	157	0.0703598	1.02099	0.400391	0.606056
HOFFMANN_BIVSBII_BI	Control	67	0.10656	1.01387	0.408998	0.616909
TSADAC_PANC50_UP	Control	17	0.201155	1.01141	0.416988	0.619242
HSA04810_REGULATION_OF_ACTIN_CYTOSKELETON	Control	147	0.0706277	1.0059	0.419483	0.627205
DAC_BLADDER_UP	Control	15	0.214354	1.004	0.426641	0.628493
ADIP_HUMAN_UP	Control	47	0.123297	1.00394	0.435845	0.626395
GALACTOSE_METABOLISM	Control	18	0.19416	1.00257	0.427146	0.626769
ZMPSTE24_KO_DN	Control	23	0.174399	1.00159	0.439306	0.626515
HDACI_COLON_BUT48HRS_UP	Control	56	0.112288	0.994644	0.42449	0.636842
CANTHARIDIN_DN	Control	31	0.151559	0.994189	0.468813	0.635421
HSA00590_ARACHIDONIC_ACID_METABOLISM	Control	22	0.173904	0.988313	0.46833	0.643687
ATRIA_UP	Control	125	0.0747459	0.983182	0.453861	0.650547
TAKEDA_NUP8_HOXA9_3D_DN	Control	15	0.212567	0.980474	0.46332	0.65329
PENG_LEUCINE_UP	Control	62	0.107715	0.975662	0.468208	0.659777
FLECHNER_KIDNEY_TRANSPLANT_REJECTION_PBL_DN	Control	33	0.140117	0.975472	0.445135	0.657892
CMV_HCMV_TIMECOURSE_48HRS_DN	Control	79	0.0934693	0.973973	0.484342	0.658383
LEE_MYC_TGFA_UP	Control	35	0.136561	0.973363	0.47817	0.657281
UVC_TTD_ALL_UP	Control	40	0.131482	0.972634	0.486815	0.656356
BLOOD_CLOTTING_CASCADE	Control	17	0.198815	0.971961	0.470085	0.655387
HEARTFAILURE_VENTRICLE_DN	Control	41	0.129698	0.96962	0.482243	0.657472
SHEPARD_POS_REG_OF_CELL_PROLIFERATION	Control	61	0.105474	0.965443	0.453416	0.662832
ZHANG_EFT_EWSFLI1_UP	Control	61	0.106036	0.95977	0.51992	0.670684
HSA03030_DNA_POLYMERASE	Control	15	0.207144	0.955679	0.495902	0.675929
LINDSTEDT_DEND_8H_VS_48H_DN	Control	49	0.115301	0.950106	0.497967	0.683928
HSA00260_GLYCINE_SERINE_AND_THREONINE_METABOLISM	Control	29	0.146716	0.947773	0.495816	0.685985
RETT_UP	Control	32	0.140987	0.946188	0.515444	0.686658
HOHENKIRK_MONOCYTE_DEND_DN	Control	75	0.0919416	0.942776	0.513513	0.690601
LEE_MYC_TGFA_DN	Control	48	0.1144	0.933857	0.534654	0.704453
NITROGEN_METABOLISM	Control	15	0.200884	0.93354	0.521212	0.702869
IRITANI_ADPROX_VASC	Control	105	0.0767449	0.921764	0.544061	0.721759
RADMACHER_AMLNORMALKARYTYPE_SIG	Control	47	0.113487	0.918703	0.570281	0.725121
ST_INTERLEUKIN_4_PATHWAY	Control	21	0.167729	0.916735	0.547244	0.726256
LEE_TCELLS4_UP	Control	23	0.159529	0.913485	0.548902	0.729613
SHIPP_FL_VS_DLBCL_UP	Control	20	0.172069	0.912058	0.567925	0.729917
HSA04742_TASTE_TRANSDUCTION	Control	18	0.176807	0.91154	0.564482	0.728567
HSA00330_ARGININE_AND_PROLINE_METABOLISM	Control	27	0.144046	0.905959	0.568589	0.736414
NAB_LUNG_DN	Control	35	0.128432	0.904998	0.578641	0.735845
4NQO_UNIQUE_FIBRO_UP	Control	18	0.177333	0.904286	0.576402	0.734862
FRUCTOSE_AND_MANNOSE_METABOLISM	Control	16	0.189991	0.902824	0.557484	0.735346
ZMPSTE24_KO_UP	Control	19	0.173913	0.90152	0.565302	0.735414
PROSTAGLANDIN_SYNTHESIS_REGULATION	Control	20	0.169162	0.897678	0.583158	0.740161
STRESS_GENOTOXIC_SPECIFIC_DN	Control	25	0.151901	0.892866	0.580042	0.746498
HINATA_NFKB_UP	Control	66	0.0934422	0.892419	0.551867	0.74506
ROSS_CBF_LEUKEMIA	Control	40	0.115314	0.888473	0.576446	0.749826
AGUIRRE_PANCREAS_CHR22	Control	43	0.113151	0.879358	0.59205	0.763903
WIELAND_HEPATITIS_B_INDUCED	Control	49	0.109845	0.879052	0.594	0.762195
DIAB_NEPH_UP	Control	41	0.117601	0.877795	0.611881	0.762087
TESTIS_EXPRESSED_GENES	Control	25	0.144803	0.876107	0.604938	0.762826
LAL_KO_6MO_UP	Control	33	0.128776	0.870134	0.602362	0.771
GLYCOLYSIS_AND_GLUCONEOGENESIS	Control	24	0.147284	0.863274	0.596708	0.780906
ADIP_VS_FIBRO_DN	Control	21	0.156744	0.859738	0.618449	0.785015
IRS_KO_ADIP_DN	Control	34	0.126129	0.85621	0.622984	0.78927
CHAUVIN_ANDROGEN_REGULATED_GENES	Control	29	0.132186	0.852389	0.634298	0.793681
UVB_NHEK1_C1	Control	31	0.126829	0.841751	0.649805	0.810161
HBX_NL_UP	Control	15	0.17695	0.839024	0.663366	0.812498
BRENTANI_CELL_ADHESION	Control	65	0.0867258	0.836077	0.67126	0.815385
HDACI_COLON_SUL12HRS_UP	Control	18	0.162923	0.831765	0.660551	0.820611
LVAD_HEARTFAILURE_UP	Control	63	0.0882252	0.830833	0.652	0.819889
GN_CAMP_GRANULOSA_DN	Control	42	0.107768	0.827888	0.684615	0.822743
APPEL_IMATINIB_UP	Control	18	0.164504	0.826258	0.671937	0.823223
GLUTATHIONE_METABOLISM	Control	15	0.179754	0.824338	0.703863	0.824139
HALMOS_CEBP_UP	Control	38	0.113143	0.822593	0.679921	0.824945
HSA00562_INOSITOL_PHOSPHATE_METABOLISM	Control	35	0.114917	0.82177	0.683333	0.824094
GRANDVAUX_IRF3_DN	Control	17	0.163707	0.820815	0.685535	0.823322
TGFBETA_LATE_UP	Control	28	0.12895	0.819005	0.662338	0.824035
HSA00860_PORPHYRIN_AND_CHLOROPHYLL_METABOLISM	Control	19	0.158842	0.818379	0.669388	0.822628
SANA_IFNG_ENDOTHELIAL_UP	Control	29	0.127078	0.817317	0.700201	0.822045
PARK_RARALPHA_UP	Control	26	0.134923	0.814155	0.673228	0.824981
CHIARETTI_ZAP70_DIFF	Control	39	0.108884	0.807525	0.720322	0.833775
RORIE_ES_PNET_DN	Control	19	0.15268	0.797955	0.700201	0.847446
GLYCOGEN_METABOLISM	Control	25	0.132942	0.797667	0.727273	0.845552
HDACI_COLON_TSA12HRS_UP	Control	17	0.158102	0.79757	0.723926	0.843349
MYOD_NIH3T3_UP	Control	66	0.0813665	0.797476	0.740664	0.841134
ET743_SARCOMA_6HRS_UP	Control	18	0.156124	0.793073	0.730061	0.846158
TCELL_ANERGIC_UP	Control	51	0.0937417	0.792329	0.724	0.844971
CARIES_PULP_DN	Control	55	0.0907836	0.790681	0.735967	0.845407
HSA00360_PHENYLALANINE_METABOLISM	Control	21	0.145107	0.790106	0.748479	0.844046
TAKEDA_NUP8_HOXA9_3D_UP	Control	104	0.0661958	0.789177	0.731161	0.843227
ROSS_AML1_ETO	Control	48	0.0948763	0.787869	0.759674	0.84313
HTERT_UP	Control	48	0.0977651	0.784807	0.738878	0.845649
ZHAN_MM_MOLECULAR_CLASSI_UP	Control	38	0.107937	0.778215	0.770245	0.854204
CMV_HCMV_TIMECOURSE_18HRS_UP	Control	49	0.0935919	0.775988	0.720978	0.855347
ADIP_DIFF_CLUSTER2	Control	28	0.12174	0.773273	0.783505	0.857263
TYROSINE_METABOLISM	Control	22	0.1355	0.770072	0.768797	0.859938
TPA_RESIST_EARLY_DN	Control	52	0.0900122	0.767841	0.753788	0.860846
LEE_CIP_UP	Control	44	0.0974842	0.76774	0.747917	0.858665
KREBS_TCA_CYCLE	Control	19	0.145099	0.764067	0.758964	0.862
ADDYA_K562_HEMIN_TREATMENT	Control	44	0.0974989	0.76391	0.747845	0.85997
ROSS_CBF_MYH	Control	32	0.115971	0.763059	0.778495	0.858859
HISTIDINE_METABOLISM	Control	18	0.147681	0.759107	0.77732	0.86238
IGF_VS_PDGF_DN	Control	31	0.114878	0.758386	0.756701	0.861225
UVB_NHEK3_C6	Control	22	0.131367	0.74934	0.776	0.872429
POMEROY_DESMOPLASIC_VS_CLASSIC_MD_UP	Control	32	0.110529	0.743885	0.796905	0.87836
NI2_MOUSE_DN	Control	27	0.118614	0.741013	0.79604	0.880183
LEE_CIP_DN	Control	42	0.09571	0.737682	0.803279	0.882767
HADDAD_CD45CD7_PLUS_VS_MINUS_UP	Control	36	0.102234	0.732511	0.800403	0.887712
HSA05010_ALZHEIMERS_DISEASE	Control	23	0.127791	0.731777	0.800391	0.886467
NO1PATHWAY	Control	20	0.135861	0.726651	0.81	0.891347
PASSERINI_SIGNAL	Control	240	0.0397195	0.725073	0.810484	0.89118
HADDAD_HSC_CD7_UP	Control	36	0.102234	0.724278	0.803468	0.890035
HSA00910_NITROGEN_METABOLISM	Control	16	0.151391	0.719796	0.840607	0.893814
CALRES_MOUSE_UP	Control	18	0.140819	0.716025	0.830739	0.89653
CARIES_PULP_HIGH_UP	Control	43	0.0926074	0.715596	0.832	0.894749
IL6_SCAR_FIBRO_UP	Control	16	0.149295	0.714947	0.795876	0.893319
ZHAN_MM_CD138_CD2_VS_REST	Control	26	0.117556	0.712656	0.840404	0.893929
LINDSTEDT_DEND_DN	Control	39	0.099254	0.71154	0.824561	0.893076
PROSTAGLANDIN_AND_LEUKOTRIENE_METABOLISM	Control	18	0.136668	0.704072	0.842767	0.900705
TSADAC_RKOSILENT_UP	Control	15	0.149938	0.701298	0.82839	0.901902
FLECHNER_KIDNEY_TRANSPLANT_REJECTION_UP	Control	41	0.0939671	0.700029	0.848544	0.901158
TAKEDA_NUP8_HOXA9_8D_DN	Control	127	0.0530199	0.69731	0.843137	0.902304
HSA00052_GALACTOSE_METABOLISM	Control	24	0.118234	0.696769	0.844444	0.900758
ZHAN_MM_CD138_CD1_VS_REST	Control	26	0.113704	0.696365	0.832994	0.898984
BRG1_SW13_UP	Control	30	0.107785	0.695301	0.85124	0.898017
GAMMA-UV_FIBRO_DN	Control	31	0.103406	0.683758	0.874517	0.909766
RNA_TRANSCRIPTION_REACTOME	Control	28	0.105403	0.675979	0.882937	0.916336
MAMMARY_DEV_UP	Control	37	0.0948216	0.667238	0.892644	0.924045
DAVIES_MGUS_MM	Control	23	0.113943	0.66237	0.879418	0.927031
ROSS_PML_RAR	Control	53	0.0774285	0.661807	0.902111	0.925342
PENG_GLUCOSE_UP	Control	15	0.140835	0.658972	0.907527	0.925987
TAKEDA_NUP8_HOXA9_6H_UP	Control	50	0.0772437	0.653901	0.901467	0.929083
YU_CMYC_DN	Control	24	0.111012	0.648919	0.894118	0.931798
TAKEDA_NUP8_HOXA9_6H_DN	Control	25	0.108825	0.647991	0.888454	0.930419
HSA01032_GLYCAN_STRUCTURES_DEGRADATION	Control	21	0.117866	0.642864	0.912698	0.933252
ALCALAY_AML_NPMC_UP	Control	89	0.0583156	0.641523	0.930967	0.932311
CMV_HCMV_TIMECOURSE_16HRS_DN	Control	16	0.126675	0.61567	0.925926	0.952936
HSA00230_PURINE_METABOLISM	Control	99	0.052122	0.605731	0.941414	0.958601
AGED_MOUSE_CEREBELLUM_UP	Control	39	0.080049	0.600636	0.93933	0.960157
OVARIAN_INFERTILITY_GENES	Control	22	0.1012	0.580166	0.945607	0.971669
PENG_RAPAMYCIN_UP	Control	86	0.0534853	0.576473	0.962227	0.971564
AGED_RHESUS_UP	Control	134	0.0413046	0.558461	0.974359	0.979193
BRCA2_BRCA1_DN	Control	28	0.0875755	0.55588	0.965587	0.978127
DAC_PANC50_UP	Control	24	0.0924986	0.544543	0.968379	0.981156
CELL_ADHESION	Control	101	0.0449379	0.536683	0.981744	0.982031
SHIPP_DLBCL_CURED_DN	Control	23	0.0904675	0.516756	0.976285	0.98686
GLYCOSPHINGOLIPID_METABOLISM	Control	16	0.0980574	0.467448	0.996032	0.994976
RCC_NL_UP	Forskolin	382	-0.234772	-5.36194	0	0
TARTE_PLASMA_BLASTIC	Forskolin	215	-0.301514	-5.06353	0	0
STEMCELL_COMMON_UP	Forskolin	132	-0.358965	-4.8156	0	0
PENG_LEUCINE_DN	Forskolin	109	-0.381372	-4.7734	0	0
UVB_NHEK3_ALL	Forskolin	281	-0.24058	-4.75656	0	0
ET743_SARCOMA_DN	Forskolin	198	-0.281224	-4.72985	0	0
MOREAUX_TACI_HI_VS_LOW_DN	Forskolin	119	-0.34743	-4.33773	0	0
UVC_XPCS_ALL_DN	Forskolin	371	-0.196769	-4.30466	0	0
PENG_GLUTAMINE_DN	Forskolin	166	-0.286388	-4.21089	0	0
CHEN_HOXA5_TARGETS_UP	Forskolin	143	-0.298881	-4.19082	0	0
PENG_RAPAMYCIN_DN	Forskolin	139	-0.298967	-4.15086	0	0
ET743_SARCOMA_72HRS_DN	Forskolin	161	-0.27482	-4.10708	0	0
UVC_XPCS_8HR_DN	Forskolin	317	-0.204672	-4.09439	0	0
LI_FETAL_VS_WT_KIDNEY_DN	Forskolin	112	-0.333315	-4.044	0	0
SERUM_FIBROBLAST_CELLCYCLE	Forskolin	95	-0.355402	-4.03945	0	0
SERUM_FIBROBLAST_CORE_UP	Forskolin	138	-0.290349	-4.0286	0	0
UVC_HIGH_ALL_DN	Forskolin	213	-0.227842	-3.86401	0	0
MRNA_PROCESSING_REACTOME	Forskolin	68	-0.395255	-3.84796	0	0
ET743_SARCOMA_48HRS_DN	Forskolin	141	-0.278979	-3.78338	0	0
IFN_ANY_UP	Forskolin	45	-0.475423	-3.77813	0	0
HSA04110_CELL_CYCLE	Forskolin	81	-0.361601	-3.75529	0	0
IFN_BETA_UP	Forskolin	38	-0.510918	-3.74407	0	0
IDX_TSA_UP_CLUSTER3	Forskolin	73	-0.36403	-3.69591	0	0
DOX_RESIST_GASTRIC_UP	Forskolin	28	-0.577357	-3.68703	0	0
GH_GHRHR_KO_24HRS_DN	Forskolin	134	-0.271133	-3.6794	0	0
DNA_DAMAGE_SIGNALING	Forskolin	55	-0.418195	-3.67014	0	0
CMV_IE86_UP	Forskolin	41	-0.489931	-3.64436	0	0
CHANG_SERUM_RESPONSE_UP	Forskolin	104	-0.306166	-3.61661	0	0
DER_IFNB_UP	Forskolin	51	-0.427498	-3.61292	0	0
LEE_TCELLS3_UP	Forskolin	71	-0.36688	-3.60615	0	0
PRMT5_KD_UP	Forskolin	125	-0.272025	-3.59399	0	0
FLECHNER_KIDNEY_TRANSPLANT_WELL_UP	Forskolin	375	-0.15726	-3.53931	0	0
VHL_NORMAL_UP	Forskolin	298	-0.175547	-3.45923	0	0
HSC_LATEPROGENITORS_ADULT	Forskolin	321	-0.166575	-3.45441	0	0
PENG_GLUCOSE_DN	Forskolin	89	-0.310763	-3.40125	0	0
OLDAGE_DN	Forskolin	35	-0.489404	-3.40092	0	0
HSC_LATEPROGENITORS_SHARED	Forskolin	317	-0.165903	-3.38909	0	0
DIAB_NEPH_DN	Forskolin	269	-0.175833	-3.36886	0	0
BRENTANI_REPAIR	Forskolin	31	-0.512171	-3.34413	0	0
BRCA1_OVEREXP_UP	Forskolin	116	-0.269247	-3.32795	0	0
MMS_MOUSE_LYMPH_HIGH_4HRS_UP	Forskolin	21	-0.601586	-3.32116	0	0
REOVIRUS_HEK293_UP	Forskolin	165	-0.219955	-3.30344	0	0
HSC_LATEPROGENITORS_FETAL	Forskolin	322	-0.161972	-3.27342	0	0
P21_P53_ANY_DN	Forskolin	34	-0.460954	-3.27235	0	0
CANCER_UNDIFFERENTIATED_META_UP	Forskolin	50	-0.387504	-3.23203	0	6e-05
BRENTANI_CELL_CYCLE	Forskolin	58	-0.368582	-3.22694	0	5.87e-05
BREASTCA_TWO_CLASSES	Forskolin	107	-0.265731	-3.18585	0	5.75e-05
OLD_FIBRO_UP	Forskolin	42	-0.409556	-3.12811	0	8.52e-05
GAY_YY1_DN	Forskolin	178	-0.20008	-3.09032	0	8.34e-05
CMV_ALL_UP	Forskolin	52	-0.361486	-3.0572	0	8.18e-05
SASAKI_ATL_UP	Forskolin	126	-0.228744	-3.05632	0	8.02e-05
CELL_CYCLE	Forskolin	54	-0.353561	-3.04568	0	7.86e-05
MRNA_SPLICING	Forskolin	34	-0.435473	-3.04391	0	7.71e-05
SASAKI_TCELL_LYMPHOMA_VS_CD4_UP	Forskolin	126	-0.228744	-3.03869	0	7.57e-05
METPATHWAY	Forskolin	30	-0.451893	-3.03635	0	7.43e-05
CMV_24HRS_UP	Forskolin	40	-0.395889	-3.01517	0	7.3e-05
CELL_CYCLE_KEGG	Forskolin	62	-0.326898	-3.00099	0	7.17e-05
FLECHNER_KIDNEY_TRANSPLANT_REJECTION_PBL_UP	Forskolin	38	-0.396745	-2.97395	0	7.05e-05
HIVNEFPATHWAY	Forskolin	45	-0.366853	-2.97253	0	6.93e-05
MOREAUX_TACI_HI_IN_PPC_UP	Forskolin	45	-0.375455	-2.94803	0	6.81e-05
PEART_HISTONE_UP	Forskolin	38	-0.404355	-2.944	0	6.7e-05
P21_ANY_DN	Forskolin	24	-0.496399	-2.91348	0	6.59e-05
YU_CMYC_UP	Forskolin	28	-0.460061	-2.91203	0	6.49e-05
OLDONLY_FIBRO_UP	Forskolin	26	-0.469639	-2.88724	0	8.37e-05
HOFFMANN_BIVSBII_BI_TABLE2	Forskolin	137	-0.210943	-2.87816	0	8.24e-05
VERNELL_PRB_CLSTR1	Forskolin	50	-0.341825	-2.8769	0	0.000101
BREAST_DUCTAL_CARCINOMA_GENES	Forskolin	15	-0.617374	-2.85568	0	9.96e-05
UVB_NHEK3_C1	Forskolin	38	-0.392302	-2.85269	0	9.82e-05
MANALO_HYPOXIA_DN	Forskolin	57	-0.323163	-2.85016	0	9.68e-05
UVB_NHEK1_DN	Forskolin	189	-0.176561	-2.84943	0	9.54e-05
CROONQUIST_IL6_STARVE_UP	Forskolin	22	-0.49779	-2.84641	0	9.4e-05
ZHAN_MM_CD138_PR_VS_REST	Forskolin	29	-0.452858	-2.82595	0	0.000128
RACCYCDPATHWAY	Forskolin	17	-0.567299	-2.81124	0	0.000145
BHATTACHARYA_ESC_UP	Forskolin	46	-0.353047	-2.81073	0	0.000143
ET743PT650_COLONCA_DN	Forskolin	33	-0.415985	-2.80804	0	0.000176
UVC_TTD_ALL_DN	Forskolin	278	-0.14754	-2.79309	0	0.000191
UVC_TTD_4HR_DN	Forskolin	228	-0.158679	-2.79259	0	0.000188
GOLDRATH_CELLCYCLE	Forskolin	22	-0.506138	-2.78647	0	0.000186
BRCA_PROGNOSIS_NEG	Forskolin	73	-0.276027	-2.77963	0	0.000199
HSA04120_UBIQUITIN_MEDIATED_PROTEOLYSIS	Forskolin	29	-0.427566	-2.77694	0	0.000197
CMV_HCMV_TIMECOURSE_ALL_UP	Forskolin	304	-0.138952	-2.77086	0	0.000194
UVB_SCC_DN	Forskolin	73	-0.27404	-2.75298	0	0.000223
CANCER_NEOPLASTIC_META_UP	Forskolin	45	-0.351239	-2.74335	0	0.000221
CMV_HCMV_TIMECOURSE_20HRS_UP	Forskolin	60	-0.296837	-2.72984	0	0.000234
PGC	Forskolin	228	-0.150148	-2.72075	0	0.000246
LE_MYELIN_UP	Forskolin	70	-0.277992	-2.70117	0	0.000302
BLEO_MOUSE_LYMPH_HIGH_24HRS_DN	Forskolin	27	-0.440239	-2.6922	0	0.000314
BAF57_BT549_DN	Forskolin	218	-0.156181	-2.68913	0	0.00031
BRCA1_OVEREXP_DN	Forskolin	69	-0.270991	-2.68572	0.00193424	0.000307
HSA00790_FOLATE_BIOSYNTHESIS	Forskolin	29	-0.405584	-2.6395	0	0.000434
IGF1PATHWAY	Forskolin	17	-0.539359	-2.62661	0	0.0005
HSC_EARLYPROGENITORS_SHARED	Forskolin	299	-0.131982	-2.62346	0	0.000494
HSC_EARLYPROGENITORS_FETAL	Forskolin	299	-0.131982	-2.61788	0	0.000517
GREENBAUM_E2A_UP	Forskolin	26	-0.432358	-2.60612	0	0.000621
FSH_OVARY_MCV152_DN	Forskolin	37	-0.359743	-2.6021	0	0.000654
UVC_HIGH_D3_DN	Forskolin	35	-0.374771	-2.60202	0	0.000647
HSC_EARLYPROGENITORS_ADULT	Forskolin	301	-0.129389	-2.59855	0	0.000681
HSA00100_BIOSYNTHESIS_OF_STEROIDS	Forskolin	15	-0.569548	-2.5749	0	0.000847
STRESS_ARSENIC_SPECIFIC_UP	Forskolin	98	-0.222155	-2.56977	0	0.000864
IFN_GAMMA_UP	Forskolin	20	-0.469008	-2.56754	0	0.000895
CXCR4PATHWAY	Forskolin	15	-0.551515	-2.56495	0	0.000886
P21_P53_MIDDLE_DN	Forskolin	17	-0.519287	-2.54932	0	0.000967
BASSO_REGULATORY_HUBS	Forskolin	96	-0.217576	-2.54068	0	0.000995
IDX_TSA_DN_CLUSTER6	Forskolin	18	-0.490668	-2.52502	0	0.00112592
UVB_NHEK1_C6	Forskolin	93	-0.223017	-2.50794	0	0.00132686
GOLDRATH_HP	Forskolin	116	-0.201335	-2.50163	0	0.00138739
UVB_NHEK3_C0	Forskolin	55	-0.289137	-2.5005	0	0.00137442
NFKBPATHWAY	Forskolin	15	-0.527155	-2.50048	0	0.00136169
BECKER_TAMOXIFEN_RESISTANT_DN	Forskolin	37	-0.346813	-2.48293	0	0.00149051
HSC_MATURE_ADULT	Forskolin	236	-0.140958	-2.458	0	0.00174757
ELONGINA_KO_DN	Forskolin	124	-0.186491	-2.44478	0	0.001883
FALT_BCLL_IG_MUTATED_VS_WT_UP	Forskolin	29	-0.377282	-2.43539	0.0020284	0.00194752
ZHAN_MULTIPLE_MYELOMA_SUBCLASSES_DIFF	Forskolin	23	-0.428403	-2.43083	0	0.00203306
HSC_MATURE_SHARED	Forskolin	179	-0.15899	-2.42586	0	0.00209452
G1PATHWAY	Forskolin	20	-0.452517	-2.42203	0	0.00216591
ET743_SARCOMA_24HRS_DN	Forskolin	81	-0.23303	-2.41371	0	0.00225829
HSA00510_N_GLYCAN_BIOSYNTHESIS	Forskolin	31	-0.359753	-2.4033	0	0.00241585
INSULINPATHWAY	Forskolin	17	-0.480464	-2.4031	0	0.00240607
MRNA_PROCESSING	Forskolin	33	-0.353315	-2.40308	0	0.00238585
BRCA1_SW480_UP	Forskolin	17	-0.486182	-2.39837	0	0.00241984
HSC_MATURE_FETAL	Forskolin	228	-0.140208	-2.39605	0.00194932	0.00242089
VANTVEER_BREAST_OUTCOME_GOOD_VS_POOR_DN	Forskolin	49	-0.284186	-2.39514	0	0.00245479
AGED_MOUSE_CORTEX_DN	Forskolin	29	-0.372895	-2.39165	0	0.00249855
PDGFPATHWAY	Forskolin	19	-0.444112	-2.37913	0.00201207	0.00262445
HDACI_COLON_CUR48HRS_UP	Forskolin	46	-0.29629	-2.37879	0.00191939	0.00262413
HSA03050_PROTEASOME	Forskolin	19	-0.455002	-2.37637	0.00203666	0.00264399
DER_IFNG_UP	Forskolin	31	-0.364306	-2.37335	0.00200803	0.0026839
MUNSHI_MM_VS_PCS_UP	Forskolin	46	-0.299568	-2.3727	0	0.00267321
RADIATION_SENSITIVITY	Forskolin	20	-0.43913	-2.37017	0	0.00270203
MAPKPATHWAY	Forskolin	58	-0.260833	-2.36267	0	0.00281965
EGFPATHWAY	Forskolin	19	-0.444112	-2.35938	0	0.00289769
BYSTROM_IL5_UP	Forskolin	24	-0.401303	-2.35049	0.00194553	0.00307219
GSK3PATHWAY	Forskolin	20	-0.43034	-2.3457	0.00200401	0.00314627
SANSOM_APC_LOSS5_UP	Forskolin	59	-0.262959	-2.3381	0	0.00329856
IL1RPATHWAY	Forskolin	20	-0.43899	-2.31113	0	0.00402242
CROONQUIST_IL6_RAS_DN	Forskolin	15	-0.488709	-2.30825	0	0.0040879
MYC_ONCOGENIC_SIGNATURE	Forskolin	121	-0.181161	-2.30113	0.00193424	0.00428602
WNTPATHWAY	Forskolin	20	-0.429214	-2.29739	0	0.00437701
HSA04620_TOLL_LIKE_RECEPTOR_SIGNALING_PATHWAY	Forskolin	65	-0.238327	-2.29085	0	0.0045237
ROME_INSULIN_2F_UP	Forskolin	130	-0.172174	-2.2896	0.004	0.00451858
UVC_XPCS_4HR_DN	Forskolin	180	-0.146592	-2.28691	0.00211864	0.00463569
SHEPARD_CRASH_AND_BURN_MUT_VS_WT_UP	Forskolin	95	-0.203863	-2.28615	0.00198413	0.00462144
UVC_TTD-XPCS_COMMON_DN	Forskolin	114	-0.183606	-2.2805	0.00191205	0.00474401
NOUZOVA_CPG_H4_UP	Forskolin	69	-0.230864	-2.26958	0	0.00504576
LEE_TCELLS8_UP	Forskolin	115	-0.176788	-2.25644	0	0.00547113
DER_IFNA_UP	Forskolin	33	-0.329256	-2.25274	0.0019802	0.00561222
HCC_SURVIVAL_GOOD_VS_POOR_DN	Forskolin	91	-0.197523	-2.25207	0	0.00557404
PROTEASOME_DEGRADATION	Forskolin	21	-0.408235	-2.24379	0.00204918	0.00585292
PROPANOATE_METABOLISM	Forskolin	24	-0.386239	-2.24276	0	0.00586652
SCHUMACHER_MYC_UP	Forskolin	38	-0.30036	-2.24025	0	0.00589585
ADIP_DIFF_CLUSTER5	Forskolin	22	-0.400825	-2.2328	0	0.00620018
MUNSHI_MM_UP	Forskolin	38	-0.300543	-2.22979	0	0.00626099
AGUIRRE_PANCREAS_CHR6	Forskolin	27	-0.356674	-2.22128	0	0.00660248
AS3_FIBRO_DN	Forskolin	17	-0.440004	-2.22055	0	0.00658467
ZHAN_TONSIL_PCBC	Forskolin	33	-0.321918	-2.21958	0	0.00656697
REN_E2F1_TARGETS	Forskolin	29	-0.342027	-2.2158	0.00202429	0.00662425
LEE_TCELLS10_UP	Forskolin	115	-0.176788	-2.21056	0	0.00677402
HSA05210_COLORECTAL_CANCER	Forskolin	72	-0.221408	-2.20844	0	0.00684639
LEE_TCELLS1_UP	Forskolin	115	-0.176788	-2.20342	0	0.00702399
HSA00071_FATTY_ACID_METABOLISM	Forskolin	30	-0.347117	-2.20098	0.00796813	0.00708568
FALT_BCLL_DN	Forskolin	31	-0.333914	-2.19686	0.002079	0.00726164
ATRBRCAPATHWAY	Forskolin	18	-0.423196	-2.19432	0	0.00735242
JAIN_NEMO_DIFF	Forskolin	43	-0.281535	-2.192	0	0.00736474
HDACI_COLON_CUR24HRS_UP	Forskolin	27	-0.353969	-2.19015	0.00389864	0.00740853
UVB_NHEK3_C5	Forskolin	27	-0.358252	-2.18565	0.00215054	0.00760001
ELONGINA_KO_UP	Forskolin	136	-0.161436	-2.18437	0.00205339	0.00760893
VEGFPATHWAY	Forskolin	21	-0.392316	-2.18321	0.00399202	0.00764125
HDACI_COLON_BUT_DN	Forskolin	174	-0.143623	-2.1756	0.0019802	0.0080029
SANSOM_APC_LOSS4_UP	Forskolin	77	-0.211285	-2.17258	0	0.00812292
IFNALPHA_RESIST_DN	Forskolin	16	-0.446648	-2.16594	0.00189394	0.0084729
CELL_CYCLE_CHECKPOINT	Forskolin	19	-0.419362	-2.16553	0.0020284	0.00843909
HOFMANN_MDS_CD34_LOW_RISK	Forskolin	26	-0.354999	-2.16337	0	0.00853967
FATTY_ACID_METABOLISM	Forskolin	49	-0.27088	-2.15886	0.00200401	0.00873753
HG_PROGERIA_DN	Forskolin	18	-0.42508	-2.15238	0.0018622	0.00903892
LEI_MYB_REGULATED_GENES	Forskolin	187	-0.133953	-2.15015	0	0.009129
HDACI_COLON_BUT12HRS_DN	Forskolin	55	-0.24019	-2.14027	0.00198807	0.00961467
BLEO_MOUSE_LYMPH_LOW_24HRS_DN	Forskolin	21	-0.386665	-2.13885	0.00380952	0.00965585
HDACI_COLON_SUL_UP	Forskolin	85	-0.200117	-2.13748	0	0.00970408
TPA_SENS_MIDDLE_UP	Forskolin	42	-0.276329	-2.13363	0.00412371	0.00985271
HSA04115_P53_SIGNALING_PATHWAY	Forskolin	46	-0.267969	-2.12369	0.00390625	0.0105707
HEARTFAILURE_ATRIA_DN	Forskolin	83	-0.193734	-2.11271	0.00212314	0.0112659
CELL_CYCLE_ARREST	Forskolin	19	-0.409555	-2.11039	0.00584795	0.0113674
HSA04210_APOPTOSIS	Forskolin	59	-0.23148	-2.10762	0.00374532	0.0115454
HDACI_COLON_CUR_UP	Forskolin	75	-0.207734	-2.10334	0.00189394	0.0117506
TRNA_SYNTHETASES	Forskolin	15	-0.457091	-2.10122	0.00613497	0.011883
CROMER_HYPOPHARYNGEAL_MET_VS_NON_UP	Forskolin	51	-0.250893	-2.09171	0	0.0125187
ROTH_HTERT_DIFF	Forskolin	20	-0.395967	-2.08428	0.0019802	0.0130243
FERRANDO_MLL_T_ALL_DN	Forskolin	60	-0.228354	-2.08311	0.00211864	0.0130445
RUIZ_TENASCIN_TARGETS	Forskolin	66	-0.22073	-2.07421	0.008	0.0136495
SIG_INSULIN_RECEPTOR_PATHWAY_IN_CARDIAC_MYOCYTES	Forskolin	36	-0.301153	-2.06814	0.00407332	0.0140759
GENOTOXINS_ALL_4HRS_REG	Forskolin	19	-0.394699	-2.06794	0.00198807	0.0140022
CERAMIDEPATHWAY	Forskolin	15	-0.44472	-2.06768	0.00766283	0.0139493
IDX_TSA_DN_CLUSTER5	Forskolin	33	-0.301195	-2.05928	0.00199203	0.0145564
IDX_TSA_DN_CLUSTER4	Forskolin	22	-0.367952	-2.05149	0	0.0151681
ECMPATHWAY	Forskolin	20	-0.376773	-2.05048	0	0.0152031
KENNY_WNT_DN	Forskolin	33	-0.301232	-2.04786	0.00578035	0.0154103
CREBPATHWAY	Forskolin	22	-0.364754	-2.04703	0.00408998	0.0154107
IGF1MTORPATHWAY	Forskolin	18	-0.398483	-2.04304	0.0077821	0.0157087
DNMT1_KO_UP	Forskolin	52	-0.242894	-2.04087	0.00213675	0.0158122
UVC_HIGH_D6_DN	Forskolin	22	-0.368946	-2.02633	0.0125	0.017223
PENG_GLUTAMINE_UP	Forskolin	146	-0.144287	-2.02563	0.00408998	0.0172165
HSA05120_EPITHELIAL_CELL_SIGNALING_IN_HELICOBACTER_PYLORI_INFECTION	Forskolin	55	-0.227168	-2.02337	0.00829876	0.0173828
RUTELLA_HEMATOGFSNDCS_DIFF	Forskolin	411	-0.0881719	-2.01987	0.00994036	0.0176873
SIG_PIP3_SIGNALING_IN_CARDIAC_MYOCTES	Forskolin	51	-0.236593	-2.01823	0	0.0178169
MENSSEN_MYC_UP	Forskolin	23	-0.351399	-2.01475	0.00792079	0.018023
APOPTOSIS_GENMAPP	Forskolin	33	-0.29138	-2.00584	0.00198807	0.0189023
YAGI_AML_PROGNOSIS	Forskolin	22	-0.354174	-2.00399	0.0060241	0.0190565
LIZUKA_G1_SM_G2	Forskolin	17	-0.402513	-2.00385	0.00397614	0.01899
IFN_ALPHA_UP	Forskolin	21	-0.363275	-1.99822	0.00603622	0.0195115
WERNER_FIBRO_DN	Forskolin	103	-0.169957	-1.9982	0.0040404	0.0194186
ATMPATHWAY	Forskolin	16	-0.417775	-1.98689	0.00400802	0.0206832
NGUYEN_KERATO_DN	Forskolin	48	-0.239779	-1.98396	0.00974659	0.02098
HSA00500_STARCH_AND_SUCROSE_METABOLISM	Forskolin	44	-0.249572	-1.9761	0	0.0218642
REOVIRUS_HEK293_DN	Forskolin	158	-0.134022	-1.97457	0.00380228	0.0219599
GUO_HEX_UP	Forskolin	51	-0.237968	-1.97374	0.00616016	0.021936
STRESS_GENOTOXIC_SPECIFIC_UP	Forskolin	21	-0.359345	-1.97199	0.00618557	0.0220446
OLD_FIBRO_DN	Forskolin	100	-0.167796	-1.97151	0.00392927	0.0219975
SHEPARD_GENES_COMMON_BW_CB_MO	Forskolin	44	-0.250056	-1.96723	0.00601202	0.0225472
G1_TO_S_CELL_CYCLE_REACTOME	Forskolin	48	-0.244375	-1.96612	0.0059761	0.0226278
SMITH_HCV_INDUCED_HCC_UP	Forskolin	25	-0.32756	-1.96224	0.00376648	0.0230132
NEMETH_TNF_UP	Forskolin	52	-0.231713	-1.96172	0.00998004	0.0229736
O6BG_RESIST_MEDULLOBLASTOMA_DN	Forskolin	32	-0.293351	-1.95941	0.0131827	0.023203
ZHAN_MMPC_EARLYVS	Forskolin	36	-0.273884	-1.95937	0.004	0.0230989
MTORPATHWAY	Forskolin	17	-0.391073	-1.95319	0.00817996	0.0237743
ST_FAS_SIGNALING_PATHWAY	Forskolin	42	-0.256456	-1.93969	0.01	0.0256865
TNFALPHA_ALL_UP	Forskolin	42	-0.247387	-1.93681	0.010101	0.0260328
OXSTRESS_RPETWO_DN	Forskolin	70	-0.199254	-1.93588	0.00204918	0.0260665
MCALPAINPATHWAY	Forskolin	19	-0.365297	-1.93046	0.0132827	0.0267545
AMINOACYL_TRNA_BIOSYNTHESIS	Forskolin	19	-0.369383	-1.92945	0.00776699	0.026814
CIRCADIAN_EXERCISE	Forskolin	32	-0.283997	-1.92543	0.010101	0.0272964
ST_GA13_PATHWAY	Forskolin	23	-0.337324	-1.92504	0.00397614	0.0272291
GLEEVECPATHWAY	Forskolin	18	-0.379979	-1.91459	0.0164271	0.0288072
OLDWERNER_FIBRO_DN	Forskolin	67	-0.200091	-1.90631	0.00788955	0.0303108
HSA01030_GLYCAN_STRUCTURES_BIOSYNTHESIS_1	Forskolin	86	-0.178223	-1.90447	0.0121704	0.0305608
UVC_HIGH_D4_DN	Forskolin	38	-0.264057	-1.90151	0.00195695	0.0309216
SHEPARD_CRASH_AND_BURN_MUT_VS_WT_DN	Forskolin	108	-0.158914	-1.9015	0.0141414	0.0307906
HSA05212_PANCREATIC_CANCER	Forskolin	57	-0.211434	-1.89685	0.00401606	0.0313746
DNA_REPLICATION_REACTOME	Forskolin	31	-0.29039	-1.89616	0.00590551	0.0313956
UVC_HIGH_D7_DN	Forskolin	22	-0.343848	-1.8905	0.00397614	0.0324162
ADIP_DIFF_CLUSTER4	Forskolin	21	-0.341743	-1.88894	0.0135659	0.032629
KIM_TH_CELLS_UP	Forskolin	33	-0.274606	-1.8886	0.022	0.0325788
UVB_NHEK3_C2	Forskolin	32	-0.279333	-1.8807	0.0100806	0.033958
UVB_NHEK3_C7	Forskolin	36	-0.262759	-1.87897	0.00613497	0.0342164
TNFALPHA_4HRS_UP	Forskolin	25	-0.314623	-1.87817	0.0175097	0.0342301
BRCA1KO_MEF_DN	Forskolin	66	-0.198196	-1.87746	0.003861	0.0342276
HSA05220_CHRONIC_MYELOID_LEUKEMIA	Forskolin	59	-0.210569	-1.87697	0.00798403	0.0341742
PASSERINI_APOPTOSIS	Forskolin	31	-0.291258	-1.87663	0.0147059	0.0340774
KNUDSEN_PMNS_DN	Forskolin	148	-0.133759	-1.87605	0.00803213	0.0340556
EGF_HDMEC_UP	Forskolin	29	-0.285563	-1.87332	0.00967118	0.0343507
CTNNB1_ONCOGENIC_SIGNATURE	Forskolin	55	-0.216386	-1.87196	0.010395	0.0344468
CMV-UV_HCMV_6HRS_UP	Forskolin	77	-0.180832	-1.8688	0.0119522	0.0349419
BRENTANI_PROTEIN_MODIFICATION	Forskolin	95	-0.157294	-1.86864	0.00192308	0.0348235
HSA04130_SNARE_INTERACTIONS_IN_VESICULAR_TRANSPORT	Forskolin	25	-0.30834	-1.86825	0.00403226	0.0347473
COCAINE_BRAIN_5D_UP	Forskolin	42	-0.241701	-1.86234	0.00641026	0.0357743
IL2RBPATHWAY	Forskolin	26	-0.300199	-1.85997	0.010101	0.0361135
ERKPATHWAY	Forskolin	23	-0.320259	-1.85987	0.016632	0.035993
ZHAN_MMPC_SIM	Forskolin	30	-0.283987	-1.85284	0.00804829	0.0373484
INTEGRINPATHWAY	Forskolin	28	-0.291103	-1.8506	0.00829876	0.0376579
EIF4PATHWAY	Forskolin	16	-0.3856	-1.83855	0.0167715	0.0400772
KENNY_WNT_UP	Forskolin	31	-0.276828	-1.82413	0.0212766	0.0435083
HSA00640_PROPANOATE_METABOLISM	Forskolin	26	-0.296384	-1.82031	0.00750469	0.0442193
APOPTOSIS	Forskolin	46	-0.225496	-1.81902	0.00400802	0.0442934
STRESSPATHWAY	Forskolin	16	-0.368253	-1.81754	0.0175439	0.0445487
HPV31_DN	Forskolin	27	-0.293137	-1.81277	0.0142857	0.045484
FASPATHWAY	Forskolin	25	-0.299541	-1.81128	0.014	0.0456454
GALE_FLT3ANDAPL_UP	Forskolin	35	-0.259831	-1.80697	0.014	0.0465354
BRCA1_OVEREXP_PROSTATE_DN	Forskolin	57	-0.200648	-1.80515	0.0257937	0.0468165
INSULIN_ADIP_INSENS_UP	Forskolin	17	-0.367316	-1.80065	0.0172414	0.0479063
TUMOR_SUPRESSOR	Forskolin	19	-0.344686	-1.80033	0.00618557	0.0478147
ST_PHOSPHOINOSITIDE_3_KINASE_PATHWAY	Forskolin	24	-0.315385	-1.79963	0.0194175	0.0478199
XPB_TTD-CS_UP	Forskolin	22	-0.317569	-1.79617	0.0179641	0.0485794
HDACI_COLON_SUL24HRS_UP	Forskolin	45	-0.228393	-1.79096	0.0152964	0.0498252
RAS_ONCOGENIC_SIGNATURE	Forskolin	159	-0.119884	-1.78299	0.0209524	0.0518823
NAB_LUNG_UP	Forskolin	19	-0.340713	-1.7827	0.0135397	0.0517731
HUMAN_CD34_ENRICHED_TRANSCRIPTION_FACTORS	Forskolin	103	-0.150643	-1.78038	0.0117188	0.0521829
KERATINOCYTEPATHWAY	Forskolin	31	-0.272277	-1.76641	0.0141414	0.0558833
VHL_RCC_UP	Forskolin	72	-0.177723	-1.75969	0.01222	0.0574739
CALRES_RHESUS_DN	Forskolin	34	-0.254998	-1.75645	0.0184049	0.0583012
HSA00650_BUTANOATE_METABOLISM	Forskolin	33	-0.260359	-1.75399	0.0260521	0.0587912
HSA04920_ADIPOCYTOKINE_SIGNALING_PATHWAY	Forskolin	52	-0.207095	-1.75245	0.0171756	0.0589693
AGEING_BRAIN_UP	Forskolin	154	-0.12115	-1.74866	0.0269151	0.0598656
HSA00970_AMINOACYL_TRNA_BIOSYNTHESIS	Forskolin	29	-0.273259	-1.74797	0.01417	0.0598643
TRANSLATION_FACTORS	Forskolin	22	-0.308227	-1.74763	0.0157791	0.0597297
WNT_SIGNALING	Forskolin	48	-0.216366	-1.74677	0.0190476	0.0597842
ST_ERK1_ERK2_MAPK_PATHWAY	Forskolin	25	-0.292589	-1.7431	0.0337972	0.0607386
HSA04912_GNRH_SIGNALING_PATHWAY	Forskolin	64	-0.183141	-1.73898	0.0120724	0.0618238
HYPOXIA_NORMAL_UP	Forskolin	154	-0.119056	-1.73475	0.0299401	0.0629858
HDACI_COLON_TSA_DN	Forskolin	43	-0.224825	-1.73325	0.0227743	0.0632471
AD12_ANY_DN	Forskolin	15	-0.372095	-1.73069	0.0266667	0.0637051
FCER1PATHWAY	Forskolin	25	-0.290986	-1.7288	0.0117647	0.0641405
LH_GRANULOSA_UP	Forskolin	59	-0.191449	-1.72648	0.0326531	0.0647154
INSULIN_SIGNALING	Forskolin	62	-0.183566	-1.72318	0.0181452	0.0655799
ALZHEIMERS_INCIPIENT_DN	Forskolin	108	-0.14219	-1.72203	0.0138889	0.0657423
CELLCYCLEPATHWAY	Forskolin	16	-0.36092	-1.7194	0.0349794	0.0664979
ST_TUMOR_NECROSIS_FACTOR_PATHWAY	Forskolin	19	-0.331034	-1.71855	0.0306513	0.0665789
HSA00280_VALINE_LEUCINE_AND_ISOLEUCINE_DEGRADATION	Forskolin	36	-0.24151	-1.71591	0.0374753	0.0672191
HDACI_COLON_SUL48HRS_UP	Forskolin	57	-0.193608	-1.7128	0.026	0.0680404
LYSINE_DEGRADATION	Forskolin	20	-0.319366	-1.70663	0.0357143	0.0699293
HSA05215_PROSTATE_CANCER	Forskolin	70	-0.177305	-1.70538	0.030426	0.0701045
FLECHNER_KIDNEY_TRANSPLANT_WELL_PBL_DN	Forskolin	29	-0.272873	-1.70271	0.0377359	0.0707141
OKUMURA_MC_LPS	Forskolin	111	-0.138986	-1.70234	0.0223577	0.070627
HSA04540_GAP_JUNCTION	Forskolin	66	-0.179095	-1.69889	0.0252101	0.0715019
N_GLYCAN_BIOSYNTHESIS	Forskolin	18	-0.332593	-1.69338	0.0211416	0.0732956
P53_SIGNALING	Forskolin	60	-0.185119	-1.69319	0.0368852	0.0731025
ARFPATHWAY	Forskolin	15	-0.368052	-1.69293	0.0277228	0.0729526
PARK_MSCS_LIN2	Forskolin	30	-0.255328	-1.68785	0.0327553	0.074541
ZHAN_MM_MOLECULAR_CLASSI_DN	Forskolin	27	-0.266008	-1.68781	0.0301205	0.0743239
FLECHNER_KIDNEY_TRANSPLANT_WELL_PBL_UP	Forskolin	97	-0.144665	-1.68554	0.0269151	0.0748593
BADPATHWAY	Forskolin	16	-0.348685	-1.68183	0.0349076	0.0760559
IFNA_HCMV_6HRS_UP	Forskolin	24	-0.293074	-1.67585	0.0320641	0.0779257
HSA05214_GLIOMA	Forskolin	49	-0.206535	-1.67368	0.0301811	0.0784046
TPA_SENS_LATE_UP	Forskolin	35	-0.239104	-1.6714	0.0295858	0.0789018
BYSTROM_IL5_DN	Forskolin	46	-0.21122	-1.66848	0.0289256	0.0797414
PEART_HISTONE_DN	Forskolin	51	-0.200529	-1.66812	0.0342052	0.0796359
BRCA1_OVEREXP_PROSTATE_UP	Forskolin	111	-0.133629	-1.66725	0.028169	0.0797599
FSH_GRANULOSA_UP	Forskolin	57	-0.189929	-1.66698	0.0367965	0.0796016
CMV_HCMV_TIMECOURSE_48HRS_UP	Forskolin	45	-0.211955	-1.66532	0.0318725	0.0800296
EDG1PATHWAY	Forskolin	17	-0.335463	-1.66133	0.0345489	0.0814346
UVB_SCC_UP	Forskolin	62	-0.180534	-1.66084	0.027451	0.0813749
HDACI_COLON_BUT30MIN_DN	Forskolin	29	-0.261483	-1.65883	0.0243408	0.081839
ST_JNK_MAPK_PATHWAY	Forskolin	33	-0.239925	-1.65828	0.0412574	0.0817996
HDACI_COLON_CURSUL_UP	Forskolin	25	-0.280915	-1.65743	0.0472279	0.0818807
HDACI_COLON_BUT48HRS_DN	Forskolin	83	-0.154329	-1.65645	0.037182	0.08197
HDACI_COLON_BUT16HRS_DN	Forskolin	75	-0.160853	-1.6562	0.0412371	0.0817894
UVB_NHEK2_DN	Forskolin	55	-0.190896	-1.65426	0.0414079	0.0823214
HSA04330_NOTCH_SIGNALING_PATHWAY	Forskolin	33	-0.245054	-1.6499	0.0365112	0.0837344
ALCALAY_AML_NPMC_DN	Forskolin	125	-0.129873	-1.6496	0.0337302	0.0836363
PROTEASOMEPATHWAY	Forskolin	18	-0.322269	-1.64764	0.0435606	0.0841203
UEDA_MOUSE_LIVER	Forskolin	98	-0.144153	-1.64695	0.0260521	0.0841975
UVC_TTD_8HR_DN	Forskolin	131	-0.124616	-1.64376	0.0320641	0.0852453
OXSTRESS_RPE_HNETBH_DN	Forskolin	31	-0.245417	-1.64349	0.035865	0.0850746
XU_CBP_UP	Forskolin	16	-0.341584	-1.64202	0.0326923	0.0854384
AGED_MOUSE_CORTEX_UP	Forskolin	24	-0.282465	-1.63775	0.0438413	0.0869451
HSA05130_PATHOGENIC_ESCHERICHIA_COLI_INFECTION_EHEC	Forskolin	30	-0.245014	-1.63589	0.0410678	0.0874903
INOS_ALL_DN	Forskolin	50	-0.197038	-1.63454	0.033195	0.0877792
HDACI_COLON_SUL_DN	Forskolin	155	-0.111941	-1.63245	0.0278884	0.0884784
TAKEDA_NUP8_HOXA9_16D_DN	Forskolin	125	-0.127959	-1.63218	0.0391389	0.0883199
HSA04740_OLFACTORY_TRANSDUCTION	Forskolin	19	-0.305907	-1.62786	0.048	0.089889
TCRPATHWAY	Forskolin	29	-0.252047	-1.62296	0.0733753	0.0916958
AS3_FIBRO_C3	Forskolin	31	-0.241771	-1.61694	0.0448718	0.0942139
BRENTANI_DEATH	Forskolin	48	-0.199691	-1.61634	0.0394477	0.0942574
TNFR1PATHWAY	Forskolin	26	-0.259715	-1.61317	0.0419162	0.095454
AGED_MOUSE_NEOCORTEX_UP	Forskolin	46	-0.20311	-1.60993	0.0361446	0.0967567
GHPATHWAY	Forskolin	19	-0.306922	-1.60913	0.0573123	0.0968308
HSA04340_HEDGEHOG_SIGNALING_PATHWAY	Forskolin	41	-0.215643	-1.60799	0.0506073	0.0969904
DRUG_RESISTANCE_AND_METABOLISM	Forskolin	66	-0.170693	-1.60631	0.0338645	0.0975702
CELL_PROLIFERATION	Forskolin	139	-0.118308	-1.60409	0.0374016	0.0983446
HSA05131_PATHOGENIC_ESCHERICHIA_COLI_INFECTION_EPEC	Forskolin	30	-0.245014	-1.60401	0.0376569	0.0981145
SHEPARD_CELL_PROLIFERATION	Forskolin	139	-0.118308	-1.60104	0.0706638	0.0992601
VALINE_LEUCINE_AND_ISOLEUCINE_DEGRADATION	Forskolin	30	-0.246973	-1.59642	0.048	0.10132
ADIP_DIFF_CLUSTER3	Forskolin	25	-0.265899	-1.59493	0.0454545	0.101788
IRITANI_ADPROX_UP	Forskolin	19	-0.305688	-1.59253	0.0438247	0.102686
TPA_SENS_MIDDLE_DN	Forskolin	202	-0.0988786	-1.59179	0.0482897	0.102796
VEGF_HUVEC_2HRS_UP	Forskolin	18	-0.315753	-1.59114	0.0403397	0.102813
HSA00310_LYSINE_DEGRADATION	Forskolin	30	-0.23578	-1.58801	0.0375494	0.104073
MYOD_NIH3T3_DN	Forskolin	41	-0.207321	-1.58632	0.0475248	0.104501
AS3_FIBRO_UP	Forskolin	31	-0.241771	-1.58545	0.0356394	0.104553
OLDWERNER_FIBRO_UP	Forskolin	16	-0.331898	-1.57987	0.0533597	0.106988
SIG_PIP3_SIGNALING_IN_B_LYMPHOCYTES	Forskolin	24	-0.265904	-1.57637	0.0495238	0.108452
HOFMANN_MANTEL_LYMPHOMA_VS_LYMPH_NODES_UP	Forskolin	32	-0.233401	-1.57425	0.0438247	0.109189
FSH_OVARY_MCV152_UP	Forskolin	38	-0.216738	-1.5734	0.0486381	0.109323
SIG_IL4RECEPTOR_IN_B_LYPHOCYTES	Forskolin	20	-0.292045	-1.57282	0.0457256	0.109276
IRS1_KO_ADIP_UP	Forskolin	68	-0.161414	-1.5709	0.0360721	0.109995
CHEMICALPATHWAY	Forskolin	16	-0.32839	-1.56843	0.0686275	0.110842
DEATHPATHWAY	Forskolin	25	-0.259469	-1.56772	0.061753	0.110901
HSA05211_RENAL_CELL_CARCINOMA	Forskolin	61	-0.171869	-1.56736	0.0462185	0.110754
YAGI_AML_PROG_ASSOC	Forskolin	77	-0.153162	-1.56274	0.04	0.11288
HSA04916_MELANOGENESIS	Forskolin	77	-0.152655	-1.55968	0.0638298	0.114203
CELL_CYCLE_REGULATOR	Forskolin	15	-0.335182	-1.55942	0.0596421	0.114055
GH_EXOGENOUS_ANY_DN	Forskolin	60	-0.174241	-1.55845	0.0414201	0.114244
SRC_ONCOGENIC_SIGNATURE	Forskolin	45	-0.196903	-1.55739	0.0665362	0.114457
SMITH_HTERT_DN	Forskolin	40	-0.210727	-1.55705	0.0402299	0.114304
GAMMA-UV_FIBRO_UP	Forskolin	30	-0.235534	-1.55202	0.0731707	0.116687
MPRPATHWAY	Forskolin	15	-0.331202	-1.54614	0.0505837	0.119522
UEDA_MOUSE_SCN	Forskolin	57	-0.175412	-1.53936	0.0541082	0.122769
FETAL_LIVER_ENRICHED_TRANSCRIPTION_FACTORS	Forskolin	51	-0.182803	-1.53889	0.0706107	0.122712
GH_GHRHR_KO_6HRS_UP	Forskolin	46	-0.189553	-1.53573	0.0664062	0.12435
CMV-UV_HCMV_6HRS_DN	Forskolin	71	-0.154832	-1.5341	0.0626223	0.124925
HOX_GENES	Forskolin	39	-0.20606	-1.53353	0.0554455	0.124895
SHEPARD_BMYB_MORPHOLINO_UP	Forskolin	110	-0.126227	-1.5313	0.0784314	0.125794
ZHAN_MULTIPLE_MYELOMA_VS_NORMAL_UP	Forskolin	37	-0.211682	-1.52771	0.0557692	0.127386
RHOPATHWAY	Forskolin	22	-0.274227	-1.52724	0.0619658	0.127324
HESS_HOXAANMEIS1_UP	Forskolin	41	-0.197795	-1.52529	0.0603113	0.128148
HSA04350_TGF_BETA_SIGNALING_PATHWAY	Forskolin	70	-0.154957	-1.52488	0.0661323	0.128027
CHIARETTI_T_ALL	Forskolin	162	-0.105482	-1.52139	0.0448065	0.129605
ACTINYPATHWAY	Forskolin	15	-0.32554	-1.52136	0.0725806	0.129283
CALRES_MOUSE_NEOCORTEX_DN	Forskolin	49	-0.184819	-1.52068	0.077381	0.129275
UV-CMV_UNIQUE_HCMV_6HRS_DN	Forskolin	51	-0.183159	-1.51872	0.0480962	0.130151
HUMAN_TISSUE_TESTIS	Forskolin	40	-0.203631	-1.51641	0.0569106	0.131082
GH_GHRHR_KO_6HRS_DN	Forskolin	23	-0.261955	-1.5143	0.0684932	0.131986
GH_AUTOCRINE_DN	Forskolin	96	-0.132113	-1.5062	0.0773694	0.136341
CMV_HCMV_TIMECOURSE_16HRS_UP	Forskolin	35	-0.21068	-1.50587	0.0722222	0.136195
HYPOXIA_RCC_NOVHL_UP	Forskolin	46	-0.184782	-1.50453	0.0723809	0.136646
HSA00450_SELENOAMINO_ACID_METABOLISM	Forskolin	21	-0.266753	-1.50209	0.0749507	0.137763
HSA05223_NON_SMALL_CELL_LUNG_CANCER	Forskolin	38	-0.203511	-1.502	0.0770791	0.13745
G2PATHWAY	Forskolin	16	-0.314637	-1.4995	0.0711462	0.138643
JNK_UP	Forskolin	18	-0.298966	-1.49634	0.0706107	0.140306
CIS_XPC_DN	Forskolin	115	-0.1192	-1.49584	0.0669371	0.140254
RADAEVA_IFNA_UP	Forskolin	22	-0.262681	-1.49551	0.0616016	0.140104
ST_ADRENERGIC	Forskolin	28	-0.236026	-1.49453	0.0717132	0.14037
HESS_HOXAANMEIS1_DN	Forskolin	41	-0.197795	-1.48306	0.0849802	0.147119
BROCKE_IL6	Forskolin	99	-0.129693	-1.48268	0.0746269	0.14703
ANDROGEN_GENES	Forskolin	24	-0.247594	-1.48093	0.0757282	0.147854
KRETZSCHMAR_IL6_DIFF	Forskolin	99	-0.129693	-1.47923	0.0652174	0.148524
AGUIRRE_PANCREAS_CHR8	Forskolin	38	-0.200298	-1.47093	0.0819328	0.153544
FMLPPATHWAY	Forskolin	22	-0.258144	-1.46752	0.0785563	0.155518
NFATPATHWAY	Forskolin	40	-0.189723	-1.46606	0.0788913	0.156162
UVC_HIGH_D8_DN	Forskolin	20	-0.276486	-1.46591	0.0879346	0.15591
UVC_HIGH_D2_DN	Forskolin	27	-0.23522	-1.46018	0.0925926	0.159339
TPA_RESIST_MIDDLE_UP	Forskolin	32	-0.216001	-1.45962	0.0881226	0.15936
HSA00565_ETHER_LIPID_METABOLISM	Forskolin	23	-0.254992	-1.45892	0.0873984	0.159452
UV_UNIQUE_FIBRO_DN	Forskolin	18	-0.287571	-1.45115	0.0636183	0.164426
SHIPP_FL_VS_DLBCL_DN	Forskolin	20	-0.275844	-1.44899	0.0897704	0.165514
GENOTOXINS_24HRS_DISCR	Forskolin	23	-0.253037	-1.44839	0.0785855	0.165476
AS3_FIBRO_C2	Forskolin	19	-0.272165	-1.44686	0.0981964	0.166171
HADDAD_HPCLYMPHO_ENRICHED	Forskolin	176	-0.0940027	-1.44661	0.0730223	0.165912
TOLLPATHWAY	Forskolin	24	-0.245168	-1.44577	0.0708333	0.166128
TPOPATHWAY	Forskolin	16	-0.29966	-1.44449	0.102725	0.166565
NTHIPATHWAY	Forskolin	17	-0.287421	-1.44364	0.0947955	0.16689
FERNANDEZ_MYC_TARGETS	Forskolin	109	-0.116578	-1.43322	0.0965092	0.173959
TPA_SENS_LATE_DN	Forskolin	156	-0.0968245	-1.43278	0.0881764	0.173876
HSC_INTERMEDIATEPROGENITORS_ADULT	Forskolin	89	-0.131631	-1.43117	0.10099	0.174643
CHESLER_BRAIN_CIS_GENES	Forskolin	39	-0.194478	-1.43094	0.103516	0.174382
CIS_XPC_UP	Forskolin	96	-0.124298	-1.42993	0.0790598	0.17469
HDACI_COLON_TSABUT_DN	Forskolin	16	-0.302371	-1.42971	0.0914513	0.174444
HDACI_COLON_SUL16HRS_UP	Forskolin	25	-0.240843	-1.42879	0.124535	0.174793
OXSTRESS_RPE_H2O2TBH_DN	Forskolin	19	-0.272165	-1.42488	0.0901804	0.177189
TSA_HEPATOMA_UP	Forskolin	20	-0.264774	-1.4247	0.109312	0.176905
AS3_FIBRO_C1	Forskolin	19	-0.272165	-1.4218	0.101727	0.178699
HSA04310_WNT_SIGNALING_PATHWAY	Forskolin	115	-0.114272	-1.42177	0.0811359	0.178298
BLEO_HUMAN_LYMPH_HIGH_24HRS_UP	Forskolin	63	-0.148752	-1.42081	0.0970874	0.178564
BYSTRYKH_HSC_BRAIN_TRANS_GLOCUS	Forskolin	124	-0.110167	-1.41953	0.0854167	0.179077
HSA04520_ADHERENS_JUNCTION	Forskolin	61	-0.152873	-1.41943	0.100604	0.178724
AGED_MOUSE_HYPOTH_DN	Forskolin	28	-0.228219	-1.41772	0.0821355	0.179629
GH_EXOGENOUS_MIDDLE_UP	Forskolin	58	-0.152155	-1.4159	0.0969697	0.180579
MITOCHONDRIAPATHWAY	Forskolin	15	-0.30334	-1.414	0.088	0.181619
ZHAN_MMPC_LATEVS	Forskolin	34	-0.203163	-1.41321	0.0987903	0.18181
VANASSE_BCL2_TARGETS	Forskolin	55	-0.161977	-1.41306	0.0975104	0.181481
HSA00903_LIMONENE_AND_PINENE_DEGRADATION	Forskolin	21	-0.259296	-1.41101	0.114053	0.18255
TPA_SENS_EARLY_DN	Forskolin	184	-0.0904891	-1.40909	0.111111	0.183613
LEE_TCELLS9_UP	Forskolin	18	-0.272449	-1.409	0.118644	0.183259
HIPPOCAMPUS_DEVELOPMENT_NEONATAL	Forskolin	19	-0.268844	-1.40507	0.120763	0.185915
UVC_LOW_ALL_DN	Forskolin	43	-0.17642	-1.39942	0.109091	0.189931
CMV_HCMV_TIMECOURSE_14HRS_UP	Forskolin	33	-0.209335	-1.39644	0.0958084	0.191827
IDX_TSA_UP_CLUSTER5	Forskolin	72	-0.139515	-1.39375	0.119675	0.193553
HDACI_COLON_CLUSTER9	Forskolin	41	-0.18475	-1.39275	0.104508	0.193952
HSA04010_MAPK_SIGNALING_PATHWAY	Forskolin	177	-0.0907749	-1.392	0.130522	0.194078
HSA05222_SMALL_CELL_LUNG_CANCER	Forskolin	68	-0.143745	-1.39146	0.114625	0.194051
FLAGELLAR_ASSEMBLY	Forskolin	15	-0.291208	-1.38944	0.11501	0.195187
SMITH_HTERT_UP	Forskolin	70	-0.143194	-1.38391	0.125	0.199191
BRCA_BRCA1_POS	Forskolin	67	-0.142725	-1.38343	0.112426	0.199192
CHAUHAN_2ME2	Forskolin	37	-0.191015	-1.38072	0.131417	0.200908
APOPTOSIS_KEGG	Forskolin	39	-0.182381	-1.37786	0.103314	0.202735
HSA04664_FC_EPSILON_RI_SIGNALING_PATHWAY	Forskolin	52	-0.161261	-1.37761	0.114224	0.20253
FATTY_ACID_DEGRADATION	Forskolin	16	-0.286037	-1.37199	0.129699	0.206495
GH_EXOGENOUS_LATE_DN	Forskolin	51	-0.164288	-1.36803	0.109162	0.20936
TNFALPHA_ADIP_DN	Forskolin	44	-0.173387	-1.36799	0.1222	0.208925
ATP_SYNTHESIS	Forskolin	15	-0.291208	-1.36635	0.125	0.209866
HSC_HSC_FETAL	Forskolin	154	-0.0967924	-1.36505	0.139216	0.210536
CITED1_KO_HET_DN	Forskolin	21	-0.24783	-1.36484	0.121272	0.210276
TYPE_III_SECRETION_SYSTEM	Forskolin	15	-0.291208	-1.36428	0.118952	0.210285
UV-4NQO_FIBRO_UP	Forskolin	18	-0.274548	-1.36421	0.0848126	0.209889
IDX_TSA_UP_CLUSTER2	Forskolin	46	-0.169912	-1.3631	0.119374	0.210385
HADDAD_HSC_CD10_UP	Forskolin	166	-0.09054	-1.36033	0.126789	0.212337
CHIARETTI_T_ALL_DIFF	Forskolin	176	-0.0889439	-1.3589	0.141454	0.212979
HSA04910_INSULIN_SIGNALING_PATHWAY	Forskolin	98	-0.119476	-1.35769	0.136929	0.21355
NEMETH_TNF_DN	Forskolin	21	-0.248038	-1.35587	0.123529	0.214572
HSC_HSC_SHARED	Forskolin	146	-0.0971859	-1.35537	0.120482	0.214477
HSA05213_ENDOMETRIAL_CANCER	Forskolin	45	-0.170033	-1.35416	0.122841	0.215066
MMS_MOUSE_LYMPH_HIGH_24HRS_UP	Forskolin	15	-0.2862	-1.35323	0.117296	0.215469
ET743_HELA_UP	Forskolin	39	-0.177319	-1.35221	0.125506	0.21587
HADDAD_CD45CD7_PLUS_VS_MINUS_DN	Forskolin	58	-0.150322	-1.35073	0.131749	0.216723
UVC_XPCS_ALL_UP	Forskolin	36	-0.18861	-1.34916	0.130522	0.217622
HADDAD_HSC_CD7_DN	Forskolin	58	-0.150322	-1.34188	0.146694	0.223786
HDACI_COLON_SUL30MIN_DN	Forskolin	29	-0.211172	-1.34186	0.123753	0.223334
ZHAN_MMPC_SIM_BC_AND_MM	Forskolin	25	-0.225899	-1.33929	0.132924	0.225145
BUTANOATE_METABOLISM	Forskolin	22	-0.244979	-1.33886	0.142562	0.22504
AT1RPATHWAY	Forskolin	24	-0.226311	-1.33854	0.154004	0.224896
PARK_MSCS_DIFF	Forskolin	20	-0.251366	-1.33787	0.154762	0.224992
UVC_HIGH_D5_DN	Forskolin	25	-0.227104	-1.33763	0.15	0.224736
HDACI_COLON_CUR_DN	Forskolin	37	-0.186306	-1.3373	0.155556	0.224566
ST_DICTYOSTELIUM_DISCOIDEUM_CAMP_CHEMOTAXIS_PATHWAY	Forskolin	24	-0.227814	-1.33368	0.137295	0.227302
AGUIRRE_PANCREAS_CHR12	Forskolin	28	-0.212213	-1.3328	0.148218	0.227624
HSA04370_VEGF_SIGNALING_PATHWAY	Forskolin	53	-0.153105	-1.33271	0.133843	0.227231
ALZHEIMERS_INCIPIENT_UP	Forskolin	218	-0.0800599	-1.33213	0.148438	0.227273
ZHAN_MM_CD1_VS_CD2_DN	Forskolin	30	-0.207295	-1.33007	0.124481	0.228544
BRACX_UP	Forskolin	18	-0.267287	-1.32913	0.147917	0.228878
HSA04720_LONG_TERM_POTENTIATION	Forskolin	48	-0.162477	-1.3274	0.135524	0.229956
PYK2PATHWAY	Forskolin	20	-0.243773	-1.3258	0.137931	0.230957
UV-CMV_UNIQUE_HCMV_6HRS_UP	Forskolin	66	-0.137615	-1.32332	0.151452	0.232663
PYRUVATE_METABOLISM	Forskolin	29	-0.207629	-1.31994	0.16092	0.235286
ADIP_DIFF_UP	Forskolin	50	-0.157109	-1.31468	0.149606	0.239412
HSA05110_CHOLERA_INFECTION	Forskolin	28	-0.20909	-1.31045	0.15213	0.242829
TARTE_BCELL	Forskolin	25	-0.222459	-1.31032	0.152918	0.24245
SIG_CD40PATHWAYMAP	Forskolin	25	-0.214514	-1.30607	0.158763	0.245776
HSA00120_BILE_ACID_BIOSYNTHESIS	Forskolin	26	-0.213435	-1.30005	0.140187	0.250997
HSA00220_UREA_CYCLE_AND_METABOLISM_OF_AMINO_GROUPS	Forskolin	18	-0.25222	-1.29506	0.166667	0.25526
YAGI_AML_PROG_FAB	Forskolin	127	-0.0962007	-1.29137	0.161616	0.258479
DSRNA_UP	Forskolin	27	-0.21029	-1.29019	0.166316	0.259074
IDX_TSA_DN_CLUSTER3	Forskolin	54	-0.147456	-1.28993	0.154321	0.258797
NGUYEN_KERATO_UP	Forskolin	22	-0.229858	-1.28742	0.160784	0.260728
CORTEX_ENRICHMENT_LATE_UP	Forskolin	15	-0.276481	-1.2842	0.182711	0.263398
NKTPATHWAY	Forskolin	19	-0.244336	-1.28385	0.155945	0.263222
LIZUKA_G2_GR_G3	Forskolin	19	-0.242906	-1.2831	0.163022	0.263435
BRENTANI_TRANSPORT_OF_VESICLES	Forskolin	15	-0.28018	-1.28278	0.185185	0.263235
AGEING_KIDNEY_SPECIFIC_DN	Forskolin	96	-0.109048	-1.28194	0.165644	0.263525
SANA_TNFA_ENDOTHELIAL_UP	Forskolin	41	-0.167351	-1.28148	0.160784	0.263491
BCRPATHWAY	Forskolin	22	-0.231611	-1.28136	0.184486	0.263103
TRYPTOPHAN_METABOLISM	Forskolin	29	-0.20203	-1.28105	0.163424	0.262875
ST_DIFFERENTIATION_PATHWAY_IN_PC12_CELLS	Forskolin	35	-0.18286	-1.28095	0.159329	0.262454
HSA05040_HUNTINGTONS_DISEASE	Forskolin	22	-0.228567	-1.28038	0.189922	0.262538
BRENTANI_SIGNALING	Forskolin	123	-0.0977707	-1.27893	0.180894	0.263444
AGED_MOUSE_HIPPOCAMPUS_ANY_UP	Forskolin	31	-0.190588	-1.27864	0.170124	0.263207
CALCINEURIN_NF_AT_SIGNALING	Forskolin	54	-0.145889	-1.27248	0.160079	0.268937
PHOTOSYNTHESIS	Forskolin	16	-0.262029	-1.27209	0.174168	0.268797
RAY_P210_DIFF	Forskolin	37	-0.178017	-1.26539	0.176591	0.275126
TPA_RESIST_EARLY_UP	Forskolin	22	-0.230073	-1.26115	0.184049	0.278999
BRCA1_MES_UP	Forskolin	31	-0.189525	-1.25902	0.178971	0.28062
INOS_ALL_UP	Forskolin	36	-0.17562	-1.25843	0.201172	0.280685
AGEING_BRAIN_DN	Forskolin	92	-0.111246	-1.25452	0.185687	0.284325
HSA04930_TYPE_II_DIABETES_MELLITUS	Forskolin	35	-0.178268	-1.25414	0.195171	0.284163
GAMMA_ESR_WS_UNREG	Forskolin	19	-0.237751	-1.25317	0.192771	0.284641
RUTELLA_HEPATGFSNDCS_UP	Forskolin	97	-0.105311	-1.24632	0.184369	0.291237
HSA00624_1_AND_2_METHYLNAPHTHALENE_DEGRADATION	Forskolin	18	-0.239846	-1.24011	0.200418	0.297422
SHEPARD_NEG_REG_OF_CELL_PROLIFERATION	Forskolin	71	-0.125651	-1.24	0.200787	0.296969
OXSTRESS_BREASTCA_UP	Forskolin	19	-0.241823	-1.23828	0.197095	0.298281
BRCA2_BRCA1_UP	Forskolin	30	-0.19193	-1.23653	0.188492	0.299529
VENTRICLES_UP	Forskolin	142	-0.0876867	-1.23188	0.201536	0.30424
IL6PATHWAY	Forskolin	17	-0.251288	-1.23043	0.220374	0.305287
GH_EXOGENOUS_EARLY_UP	Forskolin	16	-0.255345	-1.23008	0.225549	0.305044
CAMPTOTHECIN_PROBCELL_DN	Forskolin	19	-0.234072	-1.22503	0.213415	0.309948
CPR_NULL_LIVER_UP	Forskolin	24	-0.210482	-1.22497	0.208502	0.309436
ST_MYOCYTE_AD_PATHWAY	Forskolin	19	-0.237321	-1.22421	0.211268	0.309656
HSC_HSC_ADULT	Forskolin	191	-0.0759405	-1.22385	0.201258	0.309502
CMV_HCMV_TIMECOURSE_6HRS_DN	Forskolin	36	-0.174838	-1.21863	0.203488	0.31476
STEFFEN_AML_PML_PLZF_TRGT	Forskolin	23	-0.212574	-1.21742	0.243952	0.315684
S1P_SIGNALING	Forskolin	15	-0.254979	-1.21739	0.195652	0.315137
PPARAPATHWAY	Forskolin	38	-0.166092	-1.21443	0.242485	0.317699
BIOPEPTIDESPATHWAY	Forskolin	26	-0.197638	-1.21177	0.22334	0.320078
CASPASEPATHWAY	Forskolin	17	-0.250487	-1.20979	0.242661	0.321827
HSA04950_MATURITY_ONSET_DIABETES_OF_THE_YOUNG	Forskolin	16	-0.247939	-1.20395	0.223602	0.327933
LIZUKA_L1_GR_G1	Forskolin	17	-0.238874	-1.20125	0.247357	0.33036
BETA_ALANINE_METABOLISM	Forskolin	19	-0.233752	-1.20023	0.235412	0.330891
ADIP_VS_PREADIP_DN	Forskolin	27	-0.193124	-1.19788	0.228	0.332927
GN_CAMP_GRANULOSA_UP	Forskolin	40	-0.158467	-1.19578	0.247465	0.334757
PARK_RARALPHA_MOD	Forskolin	40	-0.158273	-1.19528	0.250497	0.334709
NADLER_OBESITY_HYPERGLYCEMIA	Forskolin	20	-0.222664	-1.19337	0.240458	0.336283
HOFMANN_MANTEL_LYMPHOMA_VS_LYMPH_NODES_DN	Forskolin	23	-0.20433	-1.19248	0.228033	0.336774
ST_B_CELL_ANTIGEN_RECEPTOR	Forskolin	29	-0.186842	-1.19049	0.218254	0.338572
HSA05218_MELANOMA	Forskolin	59	-0.129354	-1.1845	0.252372	0.345208
HEARTFAILURE_ATRIA_UP	Forskolin	15	-0.250463	-1.17976	0.235772	0.350258
GH_GHRHR_KO_24HRS_UP	Forskolin	100	-0.10003	-1.17442	0.227926	0.355956
PRMT5_KD_DN	Forskolin	19	-0.225405	-1.17334	0.269618	0.356675
NICK_RHAPC_UP	Forskolin	21	-0.214224	-1.16929	0.262745	0.360925
ST_P38_MAPK_PATHWAY	Forskolin	32	-0.174632	-1.16912	0.264646	0.360504
ETSPATHWAY	Forskolin	15	-0.257488	-1.15973	0.2751	0.371646
HSA00150_ANDROGEN_AND_ESTROGEN_METABOLISM	Forskolin	23	-0.199815	-1.15782	0.271484	0.373483
LIAN_MYELOID_DIFF_TF	Forskolin	23	-0.199201	-1.15068	0.272545	0.381878
WELCSH_BRCA_UP	Forskolin	30	-0.173705	-1.14969	0.2607	0.382475
STANELLE_E2F1_UP	Forskolin	22	-0.199319	-1.14367	0.281905	0.389596
P38MAPKPATHWAY	Forskolin	30	-0.175069	-1.13891	0.296367	0.395189
LINDSTEDT_DEND_8H_VS_48H_UP	Forskolin	33	-0.168263	-1.13283	0.306452	0.402533
PHOSPHATIDYLINOSITOL_SIGNALING_SYSTEM	Forskolin	62	-0.120506	-1.1322	0.27767	0.402669
HSA04360_AXON_GUIDANCE	Forskolin	96	-0.0990241	-1.13142	0.292308	0.402969
BILE_ACID_BIOSYNTHESIS	Forskolin	18	-0.216252	-1.12953	0.286837	0.404819
CELL_MOTILITY	Forskolin	71	-0.112431	-1.12373	0.288462	0.411718
HYPERTROPHY_MODEL	Forskolin	15	-0.244782	-1.12205	0.301205	0.413368
E2F3_ONCOGENIC_SIGNATURE	Forskolin	155	-0.0777309	-1.12152	0.27234	0.413341
TPA_SENS_EARLY_UP	Forskolin	34	-0.162927	-1.12031	0.285417	0.414246
SIG_BCR_SIGNALING_PATHWAY	Forskolin	30	-0.175337	-1.11752	0.315369	0.417213
IL2PATHWAY	Forskolin	15	-0.240257	-1.11656	0.308664	0.417719
HSA00561_GLYCEROLIPID_METABOLISM	Forskolin	44	-0.138768	-1.11589	0.3125	0.417914
DORSAM_HOXA9_UP	Forskolin	27	-0.176755	-1.11468	0.305085	0.418858
MOUSE_TISSUE_TESTIS	Forskolin	16	-0.225728	-1.11283	0.296681	0.420557
HDACI_COLON_BUT_UP	Forskolin	104	-0.0898296	-1.11094	0.290456	0.422335
HSA04012_ERBB_SIGNALING_PATHWAY	Forskolin	67	-0.111645	-1.11077	0.3174	0.421823
PROLIFERATION_GENES	Forskolin	246	-0.0619752	-1.10766	0.31528	0.42544
HDACI_COLON_BUT24HRS_DN	Forskolin	74	-0.11069	-1.10755	0.333981	0.424881
SA_B_CELL_RECEPTOR_COMPLEXES	Forskolin	19	-0.210858	-1.10744	0.31746	0.42428
HEMATOPOESIS_RELATED_TRANSCRIPTION_FACTORS	Forskolin	62	-0.118169	-1.10564	0.349237	0.426102
HDACI_COLON_BUT12HRS_UP	Forskolin	28	-0.177465	-1.0998	0.324649	0.433604
O6BG_RESIST_MEDULLOBLASTOMA_UP	Forskolin	15	-0.235364	-1.09892	0.319838	0.434083
ZHAN_TONSIL_BONEMARROW	Forskolin	30	-0.167329	-1.09812	0.323171	0.434356
KNUDSEN_PMNS_UP	Forskolin	51	-0.133821	-1.09511	0.327273	0.437824
UVC_XPCS_8HR_UP	Forskolin	34	-0.157462	-1.09451	0.352826	0.437924
HSA04662_B_CELL_RECEPTOR_SIGNALING_PATHWAY	Forskolin	44	-0.14089	-1.09362	0.337972	0.438458
SPRYPATHWAY	Forskolin	16	-0.229186	-1.09288	0.335306	0.438771
ST_INTEGRIN_SIGNALING_PATHWAY	Forskolin	62	-0.115957	-1.09149	0.328794	0.439943
41BBPATHWAY	Forskolin	15	-0.233448	-1.09127	0.34252	0.439511
ST_GRANULE_CELL_SURVIVAL_PATHWAY	Forskolin	21	-0.192371	-1.09099	0.337891	0.439174
CMV_HCMV_6HRS_DN	Forskolin	40	-0.147144	-1.0859	0.33871	0.445381
HSA00760_NICOTINATE_AND_NICOTINAMIDE_METABOLISM	Forskolin	16	-0.226171	-1.08264	0.350806	0.449231
KLEIN_PEL_UP	Forskolin	34	-0.159412	-1.07993	0.354167	0.452301
TPA_RESIST_LATE_UP	Forskolin	22	-0.191434	-1.07979	0.360656	0.451747
HSC_HSCANDPROGENITORS_SHARED	Forskolin	396	-0.0465831	-1.07908	0.305835	0.452033
STRESS_TPA_SPECIFIC_UP	Forskolin	26	-0.174472	-1.07826	0.338144	0.452448
INTEGRIN_MEDIATED_CELL_ADHESION_KEGG	Forskolin	69	-0.110946	-1.0776	0.354086	0.452645
HSC_HSCANDPROGENITORS_FETAL	Forskolin	396	-0.0465831	-1.07755	0.318447	0.451949
HSA02010_ABC_TRANSPORTERS_GENERAL	Forskolin	31	-0.158906	-1.07627	0.362173	0.452921
HSA00600_SPHINGOLIPID_METABOLISM	Forskolin	32	-0.159396	-1.07571	0.348884	0.452936
HSA04730_LONG_TERM_DEPRESSION	Forskolin	56	-0.122462	-1.07304	0.344423	0.456032
HSA00410_BETA_ALANINE_METABOLISM	Forskolin	19	-0.207949	-1.07245	0.350202	0.456064
SHEPARD_BMYB_MORPHOLINO_DN	Forskolin	114	-0.0873368	-1.07175	0.376033	0.456264
BASSO_GERMINAL_CENTER_CD40_DN	Forskolin	43	-0.135501	-1.06915	0.366603	0.459245
WANG_MLL_CBP_VS_GMP_DN	Forskolin	28	-0.172814	-1.06735	0.342	0.461041
SIG_CHEMOTAXIS	Forskolin	40	-0.142033	-1.06622	0.355769	0.461819
HSA04940_TYPE_I_DIABETES_MELLITUS	Forskolin	18	-0.206259	-1.06495	0.354582	0.462818
HDACI_COLON_TSA2HRS_UP	Forskolin	32	-0.160314	-1.06468	0.352823	0.462466
G13_SIGNALING_PATHWAY	Forskolin	27	-0.170256	-1.06054	0.382	0.467721
TENEDINI_MEGAKARYOCYTIC_GENES	Forskolin	33	-0.155525	-1.05718	0.363817	0.471758
IDX_TSA_DN_CLUSTER1	Forskolin	28	-0.163319	-1.05565	0.37182	0.473197
HSA00563_GLYCOSYLPHOSPHATIDYLINOSITOL_ANCHOR_BIOSYNTHESIS	Forskolin	18	-0.201564	-1.04877	0.387597	0.482265
GAMMA_UNIQUE_FIBRO_DN	Forskolin	45	-0.130294	-1.04798	0.386538	0.482665
GENOTOXINS_ALL_24HRS_REG	Forskolin	16	-0.21701	-1.04687	0.376299	0.483488
HSC_LTHSC_SHARED	Forskolin	166	-0.0679443	-1.04676	0.376258	0.482862
ZHAN_MM_CD1_VS_CD2_UP	Forskolin	64	-0.113397	-1.04388	0.376782	0.486299
TSADAC_HYPOMETH_OVCA_UP	Forskolin	26	-0.177068	-1.04221	0.380582	0.487849
HDACI_COLON_BUT2HRS_UP	Forskolin	41	-0.140229	-1.03909	0.409938	0.491843
HSA03022_BASAL_TRANSCRIPTION_FACTORS	Forskolin	21	-0.188229	-1.03658	0.388889	0.494774
LINDSTEDT_DEND_UP	Forskolin	39	-0.139409	-1.03023	0.389313	0.503414
AGUIRRE_PANCREAS_CHR7	Forskolin	26	-0.169122	-1.02643	0.414286	0.508445
HSA01510_NEURODEGENERATIVE_DISEASES	Forskolin	32	-0.150357	-1.0263	0.399586	0.507864
ZHAN_MMPC_SIMAL	Forskolin	29	-0.157345	-1.02275	0.386588	0.512324
IFN_BETA_GLIOMA_UP	Forskolin	45	-0.127742	-1.02081	0.410367	0.514446
HSC_LTHSC_FETAL	Forskolin	166	-0.0679443	-1.01982	0.426	0.515216
GPCRPATHWAY	Forskolin	22	-0.182649	-1.01637	0.423762	0.519567
ST_G_ALPHA_I_PATHWAY	Forskolin	30	-0.15593	-1.01113	0.437751	0.526697
HASLINGER_B_CLL_11Q23	Forskolin	17	-0.205081	-1.00527	0.428858	0.534599
MARCINIAK_CHOP_DIFF	Forskolin	15	-0.213738	-1.00506	0.427673	0.534054
FALT_BCLL_UP	Forskolin	27	-0.157325	-1.00165	0.44685	0.53833
HSA00251_GLUTAMATE_METABOLISM	Forskolin	24	-0.173032	-1.00054	0.457203	0.5393
CMV_HCMV_TIMECOURSE_1HR_DN	Forskolin	24	-0.163119	-0.999806	0.450397	0.539586
MAGRANGEAS_MULTIPLE_MYELOMA_IGL_VS_IGK_DN	Forskolin	15	-0.213217	-0.996943	0.452138	0.543215
BECKER_TAMOXIFEN_RESISTANT_UP	Forskolin	23	-0.172806	-0.992208	0.42607	0.549577
ZHAN_MM_CD138_MF_VS_REST	Forskolin	28	-0.157423	-0.990544	0.441352	0.551265
CITED1_KO_HET_UP	Forskolin	19	-0.185803	-0.990353	0.440644	0.550713
HOFMANN_MDS_CD34_LOW_AND_HIGH_RISK	Forskolin	24	-0.168645	-0.987884	0.446429	0.553574
LEE_MYC_E2F1_UP	Forskolin	33	-0.144997	-0.984912	0.48218	0.557313
HSC_STHSC_FETAL	Forskolin	24	-0.168884	-0.984709	0.473461	0.556746
OXSTRESS_RPETHREE_DN	Forskolin	17	-0.193928	-0.983692	0.447791	0.55744
PASSERINI_TRANSCRIPTION	Forskolin	54	-0.111548	-0.983378	0.452716	0.557073
ALKPATHWAY	Forskolin	27	-0.160391	-0.980584	0.434524	0.560422
HSA00380_TRYPTOPHAN_METABOLISM	Forskolin	43	-0.128674	-0.98012	0.471173	0.560203
NUCLEAR_RECEPTORS	Forskolin	28	-0.157034	-0.978047	0.458984	0.562484
HSA00240_PYRIMIDINE_METABOLISM	Forskolin	65	-0.103791	-0.977541	0.462598	0.562335
HALMOS_CEBP_DN	Forskolin	30	-0.155748	-0.977251	0.476744	0.561946
GLYCEROLIPID_METABOLISM	Forskolin	33	-0.142316	-0.976622	0.485477	0.562108
HSC_STHSC_SHARED	Forskolin	24	-0.168884	-0.975636	0.47957	0.562747
TNFALPHA_TGZ_ADIP_DN	Forskolin	20	-0.177848	-0.972277	0.479592	0.567085
WNT_TARGETS	Forskolin	16	-0.2021	-0.972272	0.454012	0.566221
OLDONLY_FIBRO_DN	Forskolin	33	-0.14042	-0.97175	0.478873	0.566207
HOFMANN_MDS_CD34_HIGH_RISK	Forskolin	17	-0.194927	-0.971151	0.482618	0.566295
TNFALPHA_30MIN_UP	Forskolin	20	-0.178257	-0.969326	0.490872	0.568316
HSA00564_GLYCEROPHOSPHOLIPID_METABOLISM	Forskolin	55	-0.109052	-0.968209	0.464503	0.569065
PASSERINI_PROLIFERATION	Forskolin	44	-0.123066	-0.967862	0.460922	0.568729
CARM_ERPATHWAY	Forskolin	18	-0.191141	-0.966059	0.450304	0.570709
ST_T_CELL_SIGNAL_TRANSDUCTION	Forskolin	31	-0.143891	-0.965775	0.486708	0.570303
STARCH_AND_SUCROSE_METABOLISM	Forskolin	18	-0.189265	-0.963568	0.475728	0.572937
GH_AUTOCRINE_UP	Forskolin	129	-0.0709791	-0.954579	0.505929	0.586106
TARTE_PC	Forskolin	46	-0.121802	-0.954512	0.483122	0.585324
KUROKAWA_5FU_IFN_SENSITIVE_VS_RESISTANT_DN	Forskolin	24	-0.161326	-0.952264	0.489524	0.588039
HPV31_UP	Forskolin	33	-0.136368	-0.950207	0.514911	0.590291
HSA04630_JAK_STAT_SIGNALING_PATHWAY	Forskolin	97	-0.0814099	-0.950147	0.485477	0.589492
PENTOSE_PHOSPHATE_PATHWAY	Forskolin	17	-0.187362	-0.950049	0.48954	0.588764
COCAINE_BRAIN_4WKS_UP	Forskolin	43	-0.12462	-0.949459	0.497006	0.588778
GLYCEROPHOSPHOLIPID_METABOLISM	Forskolin	37	-0.132108	-0.946047	0.50823	0.593316
NF90_DN	Forskolin	26	-0.15351	-0.945393	0.509881	0.593409
CELL_GROWTH_AND_OR_MAINTENANCE	Forskolin	45	-0.118107	-0.945228	0.500975	0.5928
HSA00051_FRUCTOSE_AND_MANNOSE_METABOLISM	Forskolin	28	-0.149114	-0.944997	0.533755	0.592285
HSC_HSCANDPROGENITORS_ADULT	Forskolin	404	-0.0416929	-0.943246	0.5	0.594241
DFOSB_BRAIN_8WKS_UP	Forskolin	34	-0.13528	-0.933479	0.490835	0.608484
FERRARI_4HPR_UP	Forskolin	16	-0.197522	-0.931317	0.523232	0.611005
HSA00030_PENTOSE_PHOSPHATE_PATHWAY	Forskolin	17	-0.187362	-0.926959	0.529175	0.617107
UV-4NQO_FIBRO_DN	Forskolin	20	-0.166889	-0.920162	0.558282	0.627081
GLUCONEOGENESIS	Forskolin	34	-0.130992	-0.918068	0.511247	0.629436
ASTIER_FN_DIFF	Forskolin	39	-0.123194	-0.91638	0.551257	0.631188
HSA05217_BASAL_CELL_CARCINOMA	Forskolin	48	-0.111736	-0.913222	0.543434	0.63536
WERNERONLY_FIBRO_DN	Forskolin	37	-0.124864	-0.912378	0.567951	0.635696
POMEROY_DESMOPLASIC_VS_CLASSIC_MD_DN	Forskolin	21	-0.163054	-0.911208	0.556622	0.636593
CMV_8HRS_DN	Forskolin	32	-0.132831	-0.910553	0.534836	0.636712
HDACI_COLON_BUT24HRS_UP	Forskolin	45	-0.116114	-0.910136	0.552326	0.636453
CAMPTOTHECIN_PROBCELL_UP	Forskolin	16	-0.188978	-0.910014	0.534836	0.635686
HSA00252_ALANINE_AND_ASPARTATE_METABOLISM	Forskolin	24	-0.156787	-0.90922	0.523715	0.635977
BREASTCA_THREE_CLASSES	Forskolin	25	-0.15283	-0.909141	0.563894	0.635156
HSA05219_BLADDER_CANCER	Forskolin	31	-0.136171	-0.907233	0.541401	0.637117
OXSTRESS_RPE_H2O2HNE_DN	Forskolin	21	-0.160401	-0.906963	0.558541	0.636629
POMEROY_MD_TREATMENT_GOOD_VS_POOR_UP	Forskolin	19	-0.169332	-0.904691	0.534	0.639285
HDACI_COLON_TSABUT_UP	Forskolin	43	-0.116353	-0.903421	0.568507	0.640359
GLYCOLYSIS	Forskolin	34	-0.130992	-0.901529	0.582627	0.642375
MENSE_HYPOXIA_TRANSPORTER_GENES	Forskolin	38	-0.124485	-0.893978	0.618577	0.65324
TAVOR_CEBP_DN	Forskolin	17	-0.179675	-0.891861	0.571992	0.65567
HSA00512_O_GLYCAN_BIOSYNTHESIS	Forskolin	26	-0.145796	-0.887611	0.586207	0.661451
AGEING_KIDNEY_DN	Forskolin	89	-0.0813064	-0.885336	0.588621	0.664059
PDGF_ES_UP	Forskolin	16	-0.184682	-0.881475	0.598394	0.669135
HSC_STHSC_ADULT	Forskolin	30	-0.131587	-0.880803	0.629699	0.66919
VIPPATHWAY	Forskolin	17	-0.179979	-0.880383	0.634888	0.668839
HDACI_COLON_CUR12HRS_UP	Forskolin	15	-0.186286	-0.877218	0.611789	0.672808
LEE_TCELLS6_UP	Forskolin	18	-0.174079	-0.873522	0.60757	0.677605
WILLERT_WNT_NCCIT_ALL_UP	Forskolin	16	-0.179521	-0.868264	0.616412	0.685241
CALRES_MOUSE_NEOCORTEX_UP	Forskolin	40	-0.115154	-0.86565	0.619608	0.688442
HSA01031_GLYCAN_STRUCTURES_BIOSYNTHESIS_2	Forskolin	47	-0.106469	-0.862095	0.62449	0.693188
HSA00980_METABOLISM_OF_XENOBIOTICS_BY_CYTOCHROME_P450	Forskolin	20	-0.163272	-0.857308	0.629555	0.699784
REFRACTORY_GASTRIC_UP	Forskolin	49	-0.104158	-0.85534	0.636	0.701981
ASTON_DEPRESSION_UP	Forskolin	27	-0.138477	-0.851308	0.61811	0.707302
ASTIER_BCELL	Forskolin	38	-0.117096	-0.846145	0.672655	0.714635
HSA04530_TIGHT_JUNCTION	Forskolin	94	-0.0729559	-0.844835	0.642458	0.715627
ARGININE_AND_PROLINE_METABOLISM	Forskolin	32	-0.123466	-0.84228	0.653021	0.718644
ROME_INSULIN_2F_DN	Forskolin	15	-0.179621	-0.834012	0.662768	0.730672
AGED_MOUSE_MUSCLE_UP	Forskolin	18	-0.160553	-0.830822	0.671937	0.734744
BRENTANI_TRANSCRIPTION_FACTORS	Forskolin	46	-0.10472	-0.829256	0.655238	0.736118
HOFFMANN_BIVSBII_IMVM	Forskolin	45	-0.105743	-0.828681	0.666667	0.735918
TGF_BETA_SIGNALING_PATHWAY	Forskolin	38	-0.115648	-0.826778	0.658228	0.737817
ROSS_FAB_M7	Forskolin	48	-0.101202	-0.82322	0.671315	0.74216
BRG1_H1299_UP	Forskolin	23	-0.143241	-0.822063	0.724138	0.742838
HSA04660_T_CELL_RECEPTOR_SIGNALING_PATHWAY	Forskolin	69	-0.0850034	-0.819802	0.718367	0.745229
LOTEM_LEUKEMIA_UP	Forskolin	16	-0.171771	-0.818061	0.706587	0.746879
MAPK_CASCADE	Forskolin	19	-0.158155	-0.814588	0.690763	0.751234
HDACI_COLON_CLUSTER6	Forskolin	32	-0.118694	-0.812347	0.670103	0.753615
MOREAUX_TACI_HI_IN_BMPC	Forskolin	44	-0.0995932	-0.804132	0.736842	0.765136
PYRIMIDINE_METABOLISM	Forskolin	42	-0.103987	-0.80398	0.728713	0.764304
HSA04150_MTOR_SIGNALING_PATHWAY	Forskolin	34	-0.116081	-0.802071	0.720617	0.766137
HSA04670_LEUKOCYTE_TRANSENDOTHELIAL_MIGRATION	Forskolin	81	-0.0775068	-0.798748	0.707031	0.769908
HSA00620_PYRUVATE_METABOLISM	Forskolin	30	-0.122403	-0.798274	0.701299	0.7696
HSA05221_ACUTE_MYELOID_LEUKEMIA	Forskolin	37	-0.110318	-0.793235	0.722936	0.776228
HDACPATHWAY	Forskolin	20	-0.147014	-0.788989	0.729045	0.781543
BCNU_GLIOMA_MGMT_48HRS_DN	Forskolin	88	-0.0709042	-0.787455	0.742394	0.782799
HDACI_COLON_CUR24HRS_DN	Forskolin	19	-0.146182	-0.787128	0.74433	0.78219
IRITANI_ADPROX_DN	Forskolin	40	-0.106313	-0.78589	0.748016	0.782838
HSA00530_AMINOSUGARS_METABOLISM	Forskolin	19	-0.14842	-0.777625	0.728745	0.794068
ST_GAQ_PATHWAY	Forskolin	17	-0.157107	-0.772486	0.763779	0.800452
TPA_RESIST_MIDDLE_DN	Forskolin	82	-0.0709812	-0.768373	0.773109	0.805481
BASSO_GERMINAL_CENTER_CD40_UP	Forskolin	55	-0.0879464	-0.766322	0.730689	0.807274
TOB1PATHWAY	Forskolin	15	-0.164015	-0.76539	0.761341	0.807541
SIG_REGULATION_OF_THE_ACTIN_CYTOSKELETON_BY_RHO_GTPASES	Forskolin	26	-0.126845	-0.764528	0.747573	0.807773
HSC_LTHSC_ADULT	Forskolin	234	-0.0425972	-0.764367	0.774262	0.806928
CMV_UV-CMV_COMMON_HCMV_6HRS_DN	Forskolin	20	-0.141256	-0.75676	0.756286	0.816603
HOGERKORP_CD44_DN	Forskolin	15	-0.157793	-0.753759	0.759223	0.819793
XU_CBP_DN	Forskolin	25	-0.127583	-0.745764	0.757637	0.830018
HDACI_COLON_SUL12HRS_DN	Forskolin	21	-0.136161	-0.742218	0.789264	0.833795
INOSITOL_PHOSPHATE_METABOLISM	Forskolin	18	-0.145247	-0.741448	0.79798	0.833795
FALT_BCLL_IG_MUTATED_VS_WT_DN	Forskolin	25	-0.123678	-0.73931	0.793713	0.835647
HDACI_COLON_CLUSTER10	Forskolin	24	-0.12491	-0.736427	0.773438	0.838553
HSA00350_TYROSINE_METABOLISM	Forskolin	41	-0.0957378	-0.728745	0.828694	0.847516
POD1_KO_MOST_DN	Forskolin	19	-0.137458	-0.7166	0.833333	0.862413
CPR_LOW_LIVER_DN	Forskolin	17	-0.14256	-0.705349	0.852	0.875531
LEE_MYC_DN	Forskolin	47	-0.0880717	-0.701892	0.852227	0.878735
CHESLER_HIGHEST_FOLD_RANGE_GENES	Forskolin	26	-0.113158	-0.701462	0.836	0.878113
LEE_MYC_E2F1_DN	Forskolin	46	-0.0877686	-0.701094	0.796296	0.877425
CALCIUM_REGULATION_IN_CARDIAC_CELLS	Forskolin	95	-0.0622139	-0.699399	0.847953	0.878375
CHESLER_BRAIN_NEURAL_HIGH_GENES	Forskolin	17	-0.140417	-0.697331	0.840237	0.879911
HSA00532_CHONDROITIN_SULFATE_BIOSYNTHESIS	Forskolin	15	-0.150994	-0.694693	0.824131	0.881986
ZHAN_MM_CD138_HP_VS_REST	Forskolin	24	-0.116068	-0.687266	0.880165	0.889716
ST_WNT_CA2_CYCLIC_GMP_PATHWAY	Forskolin	17	-0.138254	-0.684178	0.861163	0.892143
HSA04650_NATURAL_KILLER_CELL_MEDIATED_CYTOTOXICITY	Forskolin	56	-0.0774451	-0.679903	0.869198	0.896051
HSA04070_PHOSPHATIDYLINOSITOL_SIGNALING_SYSTEM	Forskolin	55	-0.0756378	-0.66313	0.895582	0.913553
ELECTRON_TRANSPORT	Forskolin	32	-0.0981163	-0.661897	0.898077	0.91362
ST_WNT_BETA_CATENIN_PATHWAY	Forskolin	25	-0.112411	-0.661837	0.89002	0.912478
G_PROTEIN_SIGNALING	Forskolin	57	-0.0750123	-0.659713	0.879208	0.91355
GLUTAMATE_METABOLISM	Forskolin	19	-0.124658	-0.657379	0.900406	0.914741
UVB_NHEK4_6HRS_UP	Forskolin	16	-0.139533	-0.656611	0.871369	0.914339
ICHIBA_GVHD	Forskolin	145	-0.0462835	-0.643865	0.917172	0.92586
H2O2_CSBDIFF_C1	Forskolin	20	-0.118793	-0.634379	0.924335	0.933771
HSA05216_THYROID_CANCER	Forskolin	25	-0.105101	-0.62856	0.936884	0.937675
HSA00340_HISTIDINE_METABOLISM	Forskolin	29	-0.0957813	-0.625603	0.926357	0.939011
HSA04320_DORSO_VENTRAL_AXIS_FORMATION	Forskolin	21	-0.113625	-0.624845	0.92887	0.938401
HOFFMANN_BIVSBII_LGBII	Forskolin	65	-0.0671768	-0.624255	0.930041	0.93768
NOUZOVA_CPG_METHLTD	Forskolin	40	-0.0822844	-0.616299	0.938104	0.94318
ALANINE_AND_ASPARTATE_METABOLISM	Forskolin	16	-0.128602	-0.612134	0.94358	0.94531
CALRES_MOUSE_DN	Forskolin	29	-0.0914543	-0.583545	0.958743	0.964319
CMV_HCMV_TIMECOURSE_24HRS_UP	Forskolin	47	-0.0711008	-0.579849	0.952475	0.96541
LU_IL4BCELL	Forskolin	46	-0.0722196	-0.578295	0.959144	0.965082
LVAD_HEARTFAILURE_DN	Forskolin	28	-0.0920823	-0.573762	0.963391	0.966639
FSH_GRANULOSA_DN	Forskolin	52	-0.0645416	-0.551756	0.96994	0.977058
LH_GRANULOSA_DN	Forskolin	52	-0.0645416	-0.547751	0.960152	0.977627
WANG_HOXA9_VS_MEIS1_UP	Forskolin	16	-0.111784	-0.527662	0.989837	0.984532
WALKER_MM_SNP_DIFF	Forskolin	30	-0.0792351	-0.521097	0.982824	0.985504
TPA_SKIN_UP	Forskolin	16	-0.106731	-0.519424	0.988142	0.984728
PASSERINI_INFLAMMATION	Forskolin	15	-0.0854071	-0.399964	1	0.999525
