# Supplementary material for: Gene Expression Analysis of Forskolin Treated Basilar Papillae Identifies MicroRNA181a as a Mediator of Proliferation
Source: PLoS One. 2010 Jul 9;5(7):e11502. doi: 10.1371/journal.pone.0011502 (PMC2901389; doi:10.1371/journal.pone.0011502)
Supplement: Table S7 — Gene set enrichment analysis statistics. Mammalian gene sets enriched in the control and forskolin samples after 24 hours. (0.19 MB XLS) [file pone.0011502.s007.xls]

## Sheet: Sheet1
Gene Set Name	Enriched in Control/Forskolin?	Gene Set Size	Enrichment Score	Normalized Enrichment Score	P-Value	False Discovery Rate (Q-Value)
YATTNATC_UNKNOWN	Control	202	0.127455	2.08547	0	1
V$CRX_Q4	Control	135	0.148076	2.05194	0.00407332	0.681933
V$NCX_01	Control	99	0.17247	2.02658	0.0019685	0.528593
V$YY1_Q6	Control	121	0.157812	1.97312	0.00821355	0.542103
GTAAGAT,MIR-200A	Control	32	0.295035	1.92672	0.00851064	0.575276
V$LYF1_01	Control	142	0.136172	1.91579	0.00598802	0.514154
V$TCF11_01	Control	134	0.139012	1.91035	0.011194	0.454043
V$TBP_01	Control	113	0.148799	1.89535	0.00967118	0.431895
ATGTACA,MIR-493	Control	223	0.10423	1.84081	0.016129	0.525799
V$AMEF2_Q6	Control	153	0.126614	1.83351	0.0101833	0.493992
V$OCT_C	Control	143	0.127018	1.80559	0.0150538	0.529961
V$POU1F1_Q6	Control	135	0.131992	1.76771	0.026694	0.593855
GGGYGTGNY_UNKNOWN	Control	316	0.0865375	1.76627	0.0214844	0.552603
V$OCT1_07	Control	89	0.159132	1.70079	0.0353635	0.719209
MYAATNNNNNNNGGC_UNKNOWN	Control	76	0.163634	1.67019	0.036	0.781759
V$TAL1BETAE47_01	Control	132	0.121236	1.66074	0.0344828	0.766594
GCCATNTTG_V$YY1_Q6	Control	225	0.0958958	1.6548	0.0193424	0.744271
V$GATA6_01	Control	157	0.112014	1.65292	0.0478088	0.709442
V$CEBPB_02	Control	161	0.109761	1.65041	0.0305499	0.679898
TGCGCANK_UNKNOWN	Control	253	0.087637	1.63245	0.0362903	0.707255
TGCAAAC,MIR-452	Control	66	0.167139	1.61215	0.0518962	0.745199
V$OCT1_02	Control	130	0.121317	1.59629	0.0477137	0.765361
CTTTGTA,MIR-524	Control	291	0.0818704	1.59407	0.039501	0.739324
GTTGNYNNRGNAAC_UNKNOWN	Control	42	0.209182	1.59194	0.0490405	0.716058
TGACATY_UNKNOWN	Control	375	0.0706337	1.58816	0.0421687	0.699719
V$AP4_Q6	Control	116	0.1244	1.5568	0.0443548	0.774563
V$HNF1_C	Control	125	0.116439	1.55498	0.0461538	0.752178
V$EVI1_03	Control	35	0.219386	1.55287	0.0619137	0.732895
V$FREAC3_01	Control	136	0.109878	1.5356	0.0565657	0.765225
V$CEBP_01	Control	158	0.10466	1.53247	0.062753	0.749943
TGCTGCT,MIR-15A,MIR-16,MIR-15B,MIR-195,MIR-424,MIR-497	Control	376	0.0694121	1.53166	0.062249	0.728222
V$OCT1_05	Control	149	0.106403	1.52637	0.0577689	0.723272
V$CHX10_01	Control	138	0.109694	1.5128	0.0578512	0.746658
V$E4BP4_01	Control	131	0.109384	1.50353	0.0686275	0.755703
V$HNF3_Q6	Control	120	0.120456	1.49221	0.0742268	0.771662
V$DR3_Q4	Control	68	0.15359	1.49193	0.0891473	0.751126
V$MEF2_Q6_01	Control	150	0.106265	1.49168	0.0665362	0.731523
V$STAT5A_01	Control	134	0.111304	1.49111	0.0718816	0.713912
V$LHX3_01	Control	142	0.109096	1.48914	0.0933063	0.701973
TMTCGCGANR_UNKNOWN	Control	73	0.145255	1.48094	0.0836653	0.711183
V$CEBP_Q3	Control	139	0.107531	1.46693	0.0778689	0.737464
TCANNTGAY_V$SREBP1_01	Control	246	0.0785002	1.45951	0.072549	0.742296
V$ER_Q6_01	Control	149	0.103667	1.45008	0.0818363	0.757132
ATGTAGC,MIR-221,MIR-222	Control	80	0.139045	1.44832	0.0854369	0.745506
V$HEB_Q6	Control	121	0.112852	1.44117	0.0878906	0.750699
ATAAGCT,MIR-21	Control	86	0.131143	1.4285	0.0959693	0.775429
RTAAACA_V$FREAC2_01	Control	498	0.0556333	1.42842	0.0983264	0.759113
V$AP4_Q5	Control	144	0.102098	1.42798	0.0926316	0.744493
TTTGCAC,MIR-19A,MIR-19B	Control	339	0.0671901	1.41931	0.109091	0.755245
CAGCACT,MIR-512-3P	Control	84	0.13125	1.41917	0.0980392	0.74054
YTATTTTNR_V$MEF2_02	Control	404	0.0620673	1.41786	0.0896414	0.730137
V$GATA1_04	Control	133	0.105378	1.41427	0.0927419	0.726832
V$RREB1_01	Control	96	0.1211	1.4058	0.104247	0.739621
V$RFX1_02	Control	127	0.107323	1.40462	0.105578	0.729554
V$SREBP1_Q6	Control	127	0.105714	1.39595	0.100604	0.74067
TACTTGA,MIR-26A,MIR-26B	Control	223	0.0821414	1.39505	0.095723	0.730316
AGCATTA,MIR-155	Control	96	0.122589	1.39355	0.0950495	0.722121
CTGCAGY_UNKNOWN	Control	388	0.0613202	1.39134	0.114341	0.715504
V$OCT1_Q6	Control	144	0.100278	1.38563	0.120388	0.71994
AACTGAC,MIR-223	Control	67	0.141004	1.38242	0.124756	0.717323
AAGWWRNYGGC_UNKNOWN	Control	57	0.157211	1.38153	0.106	0.707889
CAGTATT,MIR-200B,MIR-200C,MIR-429	Control	325	0.0650521	1.37884	0.100394	0.704528
V$VDR_Q6	Control	130	0.104986	1.37694	0.098646	0.69878
V$TAXCREB_01	Control	77	0.132371	1.37671	0.125506	0.688476
V$FAC1_01	Control	113	0.109772	1.37665	0.132039	0.678105
V$S8_01	Control	144	0.0991976	1.36615	0.113949	0.696679
V$LBP1_Q6	Control	116	0.108491	1.3618	0.139326	0.699151
V$ERR1_Q2	Control	134	0.0984791	1.35985	0.122807	0.694384
V$AR_02	Control	20	0.255528	1.35774	0.10757	0.690481
V$EVI1_05	Control	112	0.110248	1.35691	0.110647	0.682762
GCCNNNWTAAR_UNKNOWN	Control	83	0.127062	1.35682	0.122	0.673398
TGCCAAR_V$NF1_Q6	Control	383	0.0608431	1.35584	0.112186	0.66676
CAGNWMCNNNGAC_UNKNOWN	Control	47	0.16827	1.35446	0.137931	0.661279
TAAWWATAG_V$RSRFC4_Q2	Control	84	0.124467	1.35103	0.139442	0.661581
TCCCCAC,MIR-491	Control	36	0.189384	1.34917	0.143443	0.657733
GATGKMRGCG_UNKNOWN	Control	35	0.189346	1.34187	0.131179	0.667955
ACAACTT,MIR-382	Control	51	0.158675	1.34187	0.142023	0.659293
CAGTGTT,MIR-141,MIR-200A	Control	217	0.0781972	1.3298	0.151951	0.683074
TTGCCAA,MIR-182	Control	208	0.0798338	1.32597	0.150602	0.685017
YATGNWAAT_V$OCT_C	Control	202	0.0800185	1.3248	0.144	0.679426
V$BRN2_01	Control	148	0.0948855	1.32146	0.162602	0.679994
CATGTAA,MIR-496	Control	120	0.104488	1.32136	0.140594	0.671926
TTGCWCAAY_V$CEBPB_02	Control	38	0.183787	1.31649	0.164032	0.67619
ACAWNRNSRCGG_UNKNOWN	Control	40	0.178298	1.31547	0.161943	0.670749
V$CACCCBINDINGFACTOR_Q6	Control	134	0.0989922	1.30894	0.156504	0.6799
YNGTTNNNATT_UNKNOWN	Control	200	0.0786352	1.29558	0.161554	0.708321
V$FREAC4_01	Control	84	0.12023	1.28873	0.197183	0.718243
GGATTA_V$PITX2_Q2	Control	322	0.0636281	1.28719	0.163673	0.714733
V$MAZ_Q6	Control	99	0.110426	1.28376	0.167939	0.715768
YCATTAA_UNKNOWN	Control	317	0.0633995	1.28207	0.173913	0.71289
V$AR_01	Control	71	0.124892	1.28032	0.188605	0.709788
GGGATGC,MIR-324-5P	Control	33	0.185972	1.26959	0.171488	0.730393
V$CDX2_Q5	Control	150	0.0882203	1.26373	0.208163	0.738023
TGTYNNNNNRGCARM_UNKNOWN	Control	39	0.170652	1.25631	0.197531	0.751417
V$HNF1_01	Control	118	0.0999668	1.25317	0.210131	0.752801
V$HMGIY_Q6	Control	116	0.0990293	1.25117	0.198364	0.750718
RYCACNNRNNRNCAG_UNKNOWN	Control	30	0.191438	1.24669	0.211066	0.755494
ATGAAGG,MIR-205	Control	102	0.104382	1.24272	0.197531	0.759045
WYAAANNRNNNGCG_UNKNOWN	Control	32	0.184096	1.23672	0.194	0.768127
V$EVI1_04	Control	138	0.0900639	1.23436	0.198819	0.767462
V$NRF1_Q6	Control	103	0.104882	1.22932	0.213861	0.773623
TGACCTTG_V$SF1_Q6	Control	135	0.0910631	1.22912	0.198783	0.766669
V$SREBP_Q3	Control	127	0.0935722	1.22871	0.220408	0.760399
CYTAGCAAY_UNKNOWN	Control	71	0.122366	1.22779	0.210526	0.755632
V$IK1_01	Control	159	0.0851507	1.22744	0.206897	0.749383
V$OCT_Q6	Control	145	0.0848722	1.22633	0.217119	0.7452
V$AR_03	Control	37	0.168902	1.22586	0.206827	0.739464
CAGGTA_V$AREB6_01	Control	405	0.0527682	1.22394	0.216769	0.737934
V$NRSF_01	Control	55	0.137158	1.21951	0.214567	0.742924
V$TAL1BETAITF2_01	Control	134	0.0908292	1.21885	0.19877	0.737985
V$OCT1_Q5_01	Control	146	0.0880737	1.21622	0.210101	0.737564
V$OCT1_B	Control	143	0.0872962	1.21236	0.214	0.741116
V$AP2_Q6_01	Control	119	0.0955871	1.20395	0.242308	0.756639
V$PAX6_01	Control	55	0.138724	1.19748	0.242366	0.767523
V$SF1_Q6	Control	123	0.0912966	1.19382	0.245968	0.770741
CAGGGTC,MIR-504	Control	57	0.129383	1.19008	0.210736	0.774051
V$AREB6_02	Control	129	0.0882	1.18899	0.214433	0.770313
V$STAT6_01	Control	145	0.0853372	1.18896	0.256785	0.76389
GTGGTGA,MIR-197	Control	44	0.150908	1.1865	0.251055	0.764053
V$CDPCR1_01	Control	74	0.116434	1.1854	0.226891	0.760515
GGCNNMSMYNTTG_UNKNOWN	Control	46	0.148618	1.18211	0.243299	0.762736
TCTGATA,MIR-361	Control	61	0.130326	1.17626	0.275449	0.771628
RRAGTTGT_UNKNOWN	Control	137	0.0845823	1.17311	0.223909	0.773752
V$HNF3B_01	Control	131	0.0864528	1.1726	0.228407	0.768854
V$MYOD_Q6_01	Control	120	0.0930942	1.17116	0.261811	0.766405
TGAYRTCA_V$ATF3_Q6	Control	286	0.0608707	1.16721	0.27163	0.771146
V$POU3F2_01	Control	60	0.12627	1.16583	0.250485	0.768662
AGTCAGC,MIR-345	Control	38	0.158683	1.16483	0.27853	0.765278
CAGGTCC,MIR-492	Control	27	0.184718	1.15818	0.286021	0.777037
V$SRY_01	Control	114	0.0916699	1.15727	0.270103	0.773459
AAAGACA,MIR-511	Control	130	0.085183	1.15661	0.286267	0.769422
V$GATA1_02	Control	145	0.0814882	1.15419	0.279678	0.770062
V$MMEF2_Q6	Control	161	0.0760283	1.15135	0.274583	0.771328
V$CREB_Q3	Control	144	0.0809948	1.14849	0.281893	0.773249
V$HIF1_Q3	Control	124	0.0885401	1.14548	0.275281	0.775304
V$LXR_DR4_Q3	Control	43	0.147542	1.14483	0.264368	0.771398
TGGNNNNNNKCCAR_UNKNOWN	Control	202	0.0690099	1.14438	0.282258	0.766876
RNGTGGGC_UNKNOWN	Control	387	0.0500247	1.14228	0.259048	0.766869
V$GRE_C	Control	67	0.116195	1.14046	0.266533	0.765899
AAANWWTGC_UNKNOWN	Control	120	0.0896951	1.14002	0.284211	0.761592
GATAAGR_V$GATA_C	Control	162	0.0771724	1.1385	0.280561	0.760073
V$RP58_01	Control	130	0.0846704	1.13722	0.29	0.75823
V$HFH3_01	Control	113	0.0931835	1.1325	0.285714	0.764744
V$GCM_Q2	Control	120	0.089895	1.13173	0.290514	0.761392
YNTTTNNNANGCARM_UNKNOWN	Control	43	0.14576	1.12932	0.302144	0.76217
V$FOXD3_01	Control	122	0.0889017	1.12862	0.310345	0.75887
TGTGTGA,MIR-377	Control	126	0.0851863	1.12513	0.303644	0.762331
V$FOXM1_01	Control	127	0.0869612	1.1245	0.306483	0.758821
V$HFH4_01	Control	128	0.0847102	1.12251	0.302734	0.758821
V$CEBP_Q2_01	Control	154	0.0762937	1.12023	0.32582	0.759439
GCTNWTTGK_UNKNOWN	Control	168	0.0744727	1.11861	0.28169	0.758365
V$SRY_02	Control	149	0.079838	1.11517	0.302789	0.761887
V$PPARA_02	Control	45	0.139445	1.10933	0.323587	0.771998
ACCTGTTG_UNKNOWN	Control	76	0.108985	1.10828	0.306584	0.769721
GTTRYCATRR_UNKNOWN	Control	86	0.101657	1.10658	0.333333	0.768927
V$GATA1_05	Control	155	0.0768219	1.10095	0.302966	0.777442
V$AP1_Q4	Control	144	0.0766607	1.10041	0.346939	0.773766
V$YY1_02	Control	129	0.0819892	1.09719	0.320248	0.776775
V$RSRFC4_01	Control	139	0.0813229	1.09481	0.305499	0.777864
V$CDPCR3_01	Control	27	0.175065	1.09371	0.306968	0.775624
V$AP3_Q6	Control	144	0.077778	1.09284	0.339321	0.772854
AAAYRNCTG_UNKNOWN	Control	217	0.0640881	1.0921	0.334694	0.769828
ACTWSNACTNY_UNKNOWN	Control	41	0.142147	1.09207	0.34004	0.765152
CCCACAT,MIR-299-3P	Control	35	0.159854	1.09145	0.339844	0.762064
GTTNYYNNGGTNA_UNKNOWN	Control	36	0.153523	1.09005	0.34104	0.760782
V$HNF1_Q6	Control	128	0.0818622	1.08938	0.325203	0.757844
CCCAGAG,MIR-326	Control	93	0.0948777	1.08853	0.325911	0.755242
YTAATTAA_V$LHX3_01	Control	105	0.0893378	1.08608	0.350598	0.756437
V$GATA2_01	Control	60	0.1178	1.08526	0.340681	0.753719
V$GR_Q6_01	Control	154	0.0762255	1.08504	0.361055	0.749849
CAGTCAC,MIR-134	Control	33	0.157069	1.08041	0.3222	0.75639
RYTGCNWTGGNR_UNKNOWN	Control	50	0.130804	1.07844	0.332649	0.756648
V$PEA3_Q6	Control	120	0.0865158	1.0784	0.331288	0.752352
V$TFIIA_Q6	Control	135	0.0799975	1.07483	0.358416	0.756486
V$GATA1_03	Control	139	0.0772232	1.07333	0.344423	0.75577
V$GATA_Q6	Control	109	0.0854016	1.07182	0.364198	0.755358
V$LEF1_Q2	Control	114	0.0854847	1.06764	0.360417	0.761107
TGTTTAC,MIR-30A-5P,MIR-30C,MIR-30D,MIR-30B,MIR-30E-5P	Control	406	0.0456301	1.06731	0.358051	0.757567
V$STAT5B_01	Control	133	0.0782463	1.06537	0.344894	0.757854
V$FREAC7_01	Control	105	0.0893536	1.06033	0.375	0.765301
V$GNCF_01	Control	43	0.136647	1.05898	0.371951	0.764146
TGATTTRY_V$GFI1_01	Control	185	0.0676692	1.05803	0.37931	0.762313
ATGGYGGA_UNKNOWN	Control	54	0.118617	1.05585	0.370155	0.763006
GCACCTT,MIR-18A,MIR-18B	Control	70	0.107415	1.055	0.4	0.760905
AAAGGAT,MIR-501	Control	85	0.0952923	1.04869	0.37931	0.771398
GTGGGTGK_UNKNOWN	Control	153	0.0725384	1.04629	0.403292	0.772992
V$AP1_01	Control	135	0.0762472	1.04361	0.375	0.775015
V$FOX_Q2	Control	131	0.0792043	1.04271	0.394191	0.772848
ATACCTC,MIR-202	Control	122	0.0807458	1.03818	0.377953	0.779339
V$HNF4ALPHA_Q6	Control	139	0.0759886	1.03607	0.399177	0.78
WCAANNNYCAG_UNKNOWN	Control	123	0.0797293	1.03526	0.416327	0.777616
V$FOXO3_01	Control	131	0.0793091	1.03432	0.40121	0.775841
TACAATC,MIR-508	Control	47	0.1278	1.03283	0.393443	0.775315
CCANNAGRKGGC_UNKNOWN	Control	57	0.117891	1.0299	0.420601	0.777907
GTATTAT,MIR-369-3P	Control	139	0.0750646	1.0296	0.396887	0.774581
V$HMEF2_Q6	Control	88	0.0931083	1.02223	0.409709	0.78794
CTACTGT,MIR-199A	Control	125	0.0769144	1.02182	0.41129	0.784895
TATTATA,MIR-374	Control	203	0.0618308	1.02121	0.417969	0.782466
RAAGNYNNCTTY_UNKNOWN	Control	80	0.0978658	1.01859	0.397727	0.784282
V$E2F1_Q4	Control	131	0.076406	1.01751	0.419802	0.782898
V$AREB6_01	Control	133	0.0737064	1.01716	0.421162	0.779866
AAAYWAACM_V$HFH4_01	Control	147	0.0721664	1.0156	0.416667	0.779719
V$NFKB_C	Control	133	0.075488	1.01331	0.405941	0.780889
V$MIF1_01	Control	98	0.0884052	1.01188	0.423625	0.780395
V$GATA3_01	Control	125	0.0799411	1.01094	0.417515	0.77859
V$NFAT_Q4_01	Control	155	0.068969	1.00672	0.438356	0.784098
V$NF1_Q6_01	Control	150	0.0730221	1.00648	0.438356	0.780841
V$P300_01	Control	118	0.079403	1.00589	0.409283	0.778298
CTCTATG,MIR-368	Control	31	0.152061	0.999218	0.424603	0.789631
V$NKX62_Q2	Control	128	0.0768254	0.998346	0.446154	0.787753
TGTATGA,MIR-485-3P	Control	95	0.0876594	0.996861	0.43301	0.78728
V$NFMUE1_Q6	Control	132	0.0744894	0.996056	0.443787	0.785286
V$NKX61_01	Control	129	0.0762478	0.991508	0.444215	0.791535
V$HOX13_01	Control	25	0.161687	0.99134	0.461224	0.788182
V$OCT1_01	Control	139	0.0724466	0.98654	0.472837	0.795318
TTCYNRGAA_V$STAT5B_01	Control	174	0.0648296	0.983249	0.453192	0.799162
V$FOXJ2_01	Control	113	0.0784151	0.981337	0.456967	0.799443
V$CEBPGAMMA_Q6	Control	144	0.0702241	0.980796	0.464286	0.797046
CTATGCA,MIR-153	Control	145	0.0700522	0.979656	0.438492	0.795819
GGCACAT,MIR-455	Control	35	0.141817	0.978827	0.466119	0.794026
CAATGCA,MIR-33	Control	75	0.0960745	0.977796	0.456647	0.792797
V$XBP1_01	Control	68	0.099821	0.977731	0.46493	0.789381
TGGTGCT,MIR-29A,MIR-29B,MIR-29C	Control	314	0.0468335	0.971708	0.460084	0.798922
AAGTCCA,MIR-422B,MIR-422A	Control	43	0.124864	0.970745	0.474286	0.797509
V$PIT1_Q6	Control	134	0.0722623	0.968467	0.491018	0.799047
V$TFIII_Q6	Control	99	0.0846815	0.967535	0.489524	0.79742
CATTGTYY_V$SOX9_B1	Control	207	0.0592061	0.966302	0.517857	0.796624
TCCAGAT,MIR-516-5P	Control	67	0.10018	0.965206	0.484064	0.795596
GTGACTT,MIR-224	Control	108	0.0795145	0.964206	0.479915	0.794311
YTAAYNGCT_UNKNOWN	Control	83	0.0900109	0.961686	0.467197	0.796124
V$PAX4_03	Control	130	0.0732785	0.961147	0.491089	0.793733
V$LMO2COM_02	Control	135	0.0713429	0.960443	0.50505	0.791692
SMTTTTGT_UNKNOWN	Control	245	0.0529515	0.959936	0.475149	0.78931
V$PR_Q2	Control	144	0.068714	0.956735	0.501946	0.792811
V$RSRFC4_Q2	Control	125	0.0733605	0.955344	0.506849	0.792358
V$TITF1_Q3	Control	138	0.0692486	0.950653	0.496815	0.799018
V$GATA_C	Control	146	0.0668513	0.94834	0.511727	0.800545
TAATTA_V$CHX10_01	Control	462	0.038589	0.947322	0.507874	0.799267
RACTNNRTTTNC_UNKNOWN	Control	52	0.112578	0.943655	0.486166	0.803654
V$ER_Q6	Control	150	0.0668785	0.94086	0.516194	0.806231
GTGTTGA,MIR-505	Control	62	0.100541	0.939361	0.517241	0.806163
GAGCCTG,MIR-484	Control	57	0.105824	0.935622	0.517598	0.810435
CCTGCTG,MIR-214	Control	129	0.0687418	0.933878	0.494929	0.810666
V$MEF2_01	Control	98	0.0806365	0.932132	0.524096	0.810854
V$TEF_Q6	Control	143	0.0674084	0.932087	0.532803	0.807686
V$E12_Q6	Control	119	0.0747012	0.931899	0.518738	0.804796
V$AP1_Q6	Control	129	0.0715842	0.931839	0.50677	0.8017
V$SP1_01	Control	120	0.0725013	0.931122	0.508841	0.799915
V$MEF2_03	Control	142	0.067436	0.930974	0.534413	0.797039
V$BACH1_01	Control	127	0.0700526	0.929678	0.521561	0.79669
V$HEN1_01	Control	96	0.0807312	0.927457	0.528	0.798229
V$ZIC1_01	Control	137	0.0674494	0.926797	0.550936	0.796478
ACCAATC,MIR-509	Control	23	0.161313	0.924626	0.528958	0.797651
V$ER_Q6_02	Control	134	0.0700315	0.924378	0.517312	0.795057
V$CHOP_01	Control	138	0.0689121	0.922235	0.550936	0.796394
V$IPF1_Q4	Control	139	0.0667528	0.921436	0.525424	0.794785
V$SP1_Q4_01	Control	123	0.0718365	0.920159	0.53937	0.794314
V$HLF_01	Control	160	0.0625629	0.917689	0.540434	0.796108
V$DR4_Q2	Control	121	0.0704419	0.917671	0.555985	0.793072
V$HOXA4_Q2	Control	145	0.0643457	0.917452	0.587302	0.790455
V$LFA1_Q6	Control	116	0.0745116	0.916519	0.561753	0.789436
V$PBX1_01	Control	139	0.0651863	0.91224	0.561265	0.794943
CTAWWWATA_V$RSRFC4_Q2	Control	200	0.0552219	0.91041	0.551935	0.795534
CTGTTAC,MIR-194	Control	71	0.096162	0.909555	0.539062	0.794302
V$AP2ALPHA_01	Control	107	0.075208	0.907763	0.549902	0.794708
V$MYOD_Q6	Control	124	0.0688621	0.906137	0.570552	0.794795
V$MAZR_01	Control	95	0.0791265	0.905484	0.559356	0.793105
V$P53_DECAMER_Q2	Control	141	0.0649921	0.905253	0.577689	0.790636
V$SRF_C	Control	117	0.0722232	0.90494	0.537975	0.788301
V$SRF_Q4	Control	125	0.0679983	0.90458	0.591463	0.786042
V$OCT1_06	Control	162	0.0610671	0.898729	0.577731	0.794882
ACATATC,MIR-190	Control	47	0.111308	0.8955	0.573196	0.798474
V$CEBPDELTA_Q6	Control	137	0.0677444	0.893262	0.57582	0.800003
RNTCANNRNNYNATTW_UNKNOWN	Control	45	0.112473	0.88852	0.568589	0.806051
V$P53_02	Control	130	0.0668664	0.885623	0.6	0.80898
V$PAX4_04	Control	122	0.0689294	0.884038	0.610039	0.808947
V$STAT5A_03	Control	145	0.0633867	0.883959	0.601533	0.806148
V$SREBP1_02	Control	44	0.110963	0.881031	0.592668	0.808908
V$HNF4_DR1_Q3	Control	128	0.0647141	0.879295	0.599206	0.809389
V$PR_02	Control	84	0.0825179	0.872162	0.592369	0.820081
V$FOXO4_01	Control	138	0.0637099	0.871869	0.609037	0.817756
YKACATTT_UNKNOWN	Control	148	0.0605404	0.865527	0.637652	0.826786
V$AP1_Q2	Control	149	0.0616223	0.861673	0.622754	0.831291
YGCANTGCR_UNKNOWN	Control	70	0.0872069	0.860049	0.631474	0.831529
AAAGGGA,MIR-204,MIR-211	Control	150	0.0593559	0.859017	0.660749	0.830671
V$FOXO4_02	Control	148	0.0604216	0.85852	0.630189	0.828789
V$TCF11MAFG_01	Control	119	0.0682713	0.85802	0.649798	0.826891
V$TAL1ALPHAE47_01	Control	134	0.0614273	0.856646	0.633721	0.826623
V$MEF2_02	Control	138	0.0618502	0.854414	0.632094	0.827894
V$IK3_01	Control	124	0.0663815	0.847004	0.632495	0.838708
CAGNYGKNAAA_UNKNOWN	Control	38	0.113202	0.841539	0.664609	0.846196
V$COMP1_01	Control	70	0.0884878	0.840935	0.685714	0.844499
KCCGNSWTTT_UNKNOWN	Control	63	0.0891373	0.839643	0.654321	0.843947
ATGCTGG,MIR-338	Control	73	0.0811299	0.834625	0.682377	0.850352
V$NFE2_01	Control	140	0.0618903	0.8346	0.679325	0.847515
GTGCAAT,MIR-25,MIR-32,MIR-92,MIR-363,MIR-367	Control	200	0.0517909	0.833293	0.666667	0.847018
GCAAGGA,MIR-502	Control	45	0.106489	0.832537	0.671287	0.845355
V$AP4_01	Control	126	0.0640689	0.831464	0.666667	0.844454
V$MEIS1_01	Control	131	0.0628833	0.828088	0.675299	0.847861
GCANCTGNY_V$MYOD_Q6	Control	444	0.0342693	0.826231	0.694553	0.848508
V$SOX5_01	Control	167	0.0548039	0.824789	0.681467	0.848311
V$AP2_Q3	Control	132	0.0613902	0.820618	0.696043	0.85302
V$CP2_01	Control	118	0.0638729	0.816099	0.692015	0.858347
V$HFH1_01	Control	145	0.0581287	0.814839	0.701245	0.857747
V$AP2REP_01	Control	80	0.0769353	0.801817	0.712551	0.877981
GGCAGTG,MIR-324-3P	Control	62	0.0875584	0.801788	0.7	0.875149
V$CART1_01	Control	128	0.0614296	0.800849	0.686869	0.873904
V$CP2_02	Control	111	0.0639057	0.798557	0.733607	0.875235
V$IK2_01	Control	152	0.0560761	0.794707	0.735772	0.879133
V$CMYB_01	Control	127	0.0610544	0.792443	0.774127	0.880204
V$GR_01	Control	118	0.0621858	0.789121	0.740079	0.882817
CTGRYYYNATT_UNKNOWN	Control	37	0.106521	0.780905	0.753968	0.893985
ATATGCA,MIR-448	Control	141	0.0574301	0.780576	0.748047	0.891777
V$TCF1P_Q6	Control	131	0.0573854	0.774612	0.759296	0.898734
RYTAAWNNNTGAY_UNKNOWN	Control	41	0.102283	0.773404	0.758893	0.897985
CTAGGAA,MIR-384	Control	45	0.0959489	0.76088	0.761811	0.915593
ARGGGTTAA_UNKNOWN	Control	60	0.0840979	0.760844	0.756436	0.912747
AGTCTTA,MIR-499	Control	49	0.0907956	0.755039	0.754032	0.919211
CCATCCA,MIR-432	Control	37	0.103719	0.748533	0.785156	0.926609
TTCCGTT,MIR-191	Control	21	0.137565	0.748229	0.791253	0.924166
V$AP2GAMMA_01	Control	113	0.0598128	0.747321	0.781676	0.922693
V$RORA2_01	Control	82	0.0702961	0.745076	0.804301	0.923374
V$BACH2_01	Control	123	0.0571507	0.743458	0.780439	0.922988
V$OCT1_03	Control	134	0.0549066	0.742202	0.773663	0.921991
V$STAT_01	Control	133	0.0552007	0.741677	0.80396	0.919996
V$COUP_DR1_Q6	Control	114	0.0595735	0.736798	0.799611	0.924711
ATGCTGC,MIR-103,MIR-107	Control	135	0.0544861	0.731448	0.828	0.929751
V$MYB_Q6	Control	134	0.0543282	0.729781	0.807087	0.92942
SYATTGTG_UNKNOWN	Control	113	0.058129	0.723114	0.832677	0.936154
TGCTTTG,MIR-330	Control	219	0.0435467	0.721991	0.815891	0.934919
CCAWWNAAGG_V$SRF_Q4	Control	44	0.0898546	0.720705	0.828685	0.933953
CTCAGGG,MIR-125B,MIR-125A	Control	195	0.0440053	0.719531	0.849903	0.932719
V$CDPCR3HD_01	Control	131	0.0535295	0.717867	0.823171	0.932267
V$STAT_Q6	Control	131	0.0538428	0.717827	0.80123	0.929533
V$PXR_Q2	Control	144	0.0522765	0.712632	0.818004	0.934051
V$AML1_Q6	Control	122	0.0554328	0.712401	0.859794	0.931592
V$PAX4_01	Control	139	0.0508425	0.712016	0.850895	0.929353
V$ATF_B	Control	102	0.0598863	0.708975	0.832347	0.930656
V$AML1_01	Control	122	0.0554328	0.708918	0.828996	0.928013
V$ZIC2_01	Control	131	0.0518296	0.707942	0.844581	0.926602
V$FOXO1_01	Control	147	0.0506084	0.705733	0.823171	0.926664
V$RFX1_01	Control	123	0.0554547	0.7043	0.850807	0.925776
CAGCAGG,MIR-370	Control	89	0.0640445	0.703436	0.840491	0.924168
V$AREB6_04	Control	137	0.051838	0.701401	0.844444	0.924012
GTACAGG,MIR-486	Control	38	0.0948665	0.684729	0.872299	0.94279
TAAYNRNNTCC_UNKNOWN	Control	98	0.0593145	0.675259	0.84913	0.951401
TAGAACC,MIR-182	Control	22	0.119955	0.673619	0.862213	0.950639
V$FXR_IR1_Q6	Control	56	0.0765568	0.66769	0.887574	0.954534
V$HFH8_01	Control	126	0.0513273	0.664462	0.915187	0.955373
V$AP1FJ_Q2	Control	143	0.0474942	0.663402	0.882937	0.953898
V$VDR_Q3	Control	104	0.0547064	0.662358	0.884937	0.95234
V$PR_01	Control	81	0.0636337	0.661924	0.89899	0.950129
YTTCCNNNGGAMR_UNKNOWN	Control	29	0.105074	0.661624	0.879845	0.947774
V$ETS1_B	Control	120	0.0519836	0.657082	0.890151	0.95022
RTTTNNNYTGGM_UNKNOWN	Control	95	0.0574782	0.655771	0.89613	0.948909
AGGAGTG,MIR-483	Control	46	0.0840504	0.655411	0.885417	0.946598
GAGACTG,MIR-452	Control	63	0.0708647	0.652756	0.903353	0.946799
CCCNNGGGAR_V$OLF1_01	Control	164	0.0440148	0.649445	0.90535	0.947375
V$NFKB_Q6	Control	128	0.0484602	0.639016	0.921154	0.954923
V$ALPHACP1_01	Control	133	0.0471406	0.628443	0.910853	0.962336
V$AML_Q6	Control	128	0.0482265	0.623615	0.926641	0.96401
CCTNTMAGA_UNKNOWN	Control	62	0.0663767	0.612265	0.928571	0.970838
V$ATF1_Q6	Control	134	0.0434323	0.608709	0.931238	0.971005
V$NKX25_02	Control	156	0.0414376	0.601423	0.957661	0.973932
GGGGCCC,MIR-296	Control	25	0.101437	0.599308	0.940358	0.972818
GACAATC,MIR-219	Control	97	0.0510476	0.598487	0.945892	0.970763
TTGGAGA,MIR-515-5P,MIR-519E	Control	92	0.0516796	0.575715	0.96627	0.983226
V$DBP_Q6	Control	132	0.0423827	0.572364	0.967546	0.982647
V$NF1_Q6	Control	142	0.0407803	0.567354	0.966135	0.98291
RGAANNTTC_V$HSF1_01	Control	245	0.0312866	0.550421	0.967807	0.989076
GTCTTCC,MIR-7	Control	97	0.0458135	0.527857	0.988395	0.995352
TCTCTCC,MIR-185	Control	58	0.0572378	0.50974	0.987976	0.998276
AGGGCCA,MIR-328	Control	45	0.0562978	0.452916	1	1
V$STAT5A_02	Control	78	0.0436345	0.45119	0.99384	1
RYAAAKNNNNNNTTGW_UNKNOWN	Control	49	0.0549795	0.441841	0.996055	1
V$CACBINDINGPROTEIN_Q6	Control	113	0.0331389	0.40317	1	0.999549
RCGCANGCGY_V$NRF1_Q6	Forskolin	419	-0.159666	-3.71178	0	0
MGGAAGTG_V$GABP_B	Forskolin	362	-0.131847	-2.91324	0	0.000526
V$E2F1_Q6_01	Forskolin	118	-0.217965	-2.76845	0	0.00312547
V$GABP_B	Forskolin	102	-0.220101	-2.57408	0	0.0127475
V$E2F_Q4_01	Forskolin	120	-0.197307	-2.53263	0	0.0139628
TTTGCAG,MIR-518A-2	Forskolin	139	-0.184135	-2.48069	0.00204082	0.0163239
GCGNNANTTCC_UNKNOWN	Forskolin	63	-0.248212	-2.35467	0	0.0331569
GGAANCGGAANY_UNKNOWN	Forskolin	54	-0.269395	-2.34969	0	0.0299221
V$USF_C	Forskolin	156	-0.164654	-2.32129	0	0.0318792
V$E2F_Q6	Forskolin	118	-0.183778	-2.29689	0	0.0331636
V$E2F_03	Forskolin	120	-0.175902	-2.26098	0	0.0377062
GCACTTT,MIR-17-5P,MIR-20A,MIR-106A,MIR-106B,MIR-20B,MIR-519D	Forskolin	376	-0.100801	-2.25979	0	0.0348243
V$E2F1DP1RB_01	Forskolin	108	-0.184225	-2.25746	0	0.0327103
V$E2F_Q4	Forskolin	121	-0.171524	-2.21093	0.00210084	0.0417971
V$E2F1DP2_01	Forskolin	113	-0.169951	-2.15686	0.0020202	0.0547927
WCTCNATGGY_UNKNOWN	Forskolin	36	-0.300946	-2.1401	0	0.057622
V$E2F_02	Forskolin	113	-0.169951	-2.13629	0	0.0558217
V$E2F4DP2_01	Forskolin	113	-0.169951	-2.13416	0.00204082	0.053237
ACTAYRNNNCCCR_UNKNOWN	Forskolin	199	-0.128176	-2.12176	0.00195695	0.0544342
V$NRF2_01	Forskolin	111	-0.178572	-2.1198	0.0020202	0.052586
V$E2F4DP1_01	Forskolin	112	-0.165239	-2.10399	0.00404858	0.0551715
V$E2F_Q6_01	Forskolin	117	-0.171123	-2.08947	0	0.0573742
CGGAARNGGCNG_UNKNOWN	Forskolin	24	-0.352172	-2.0792	0.00210084	0.0575337
CCGNMNNTNACG_UNKNOWN	Forskolin	41	-0.276878	-2.07915	0.00819672	0.0551364
SGCGSSAAA_V$E2F1DP2_01	Forskolin	81	-0.198021	-2.06995	0.00196464	0.0557969
V$USF_01	Forskolin	137	-0.152987	-2.06329	0.0020202	0.055816
V$IRF7_01	Forskolin	144	-0.150133	-2.05724	0.00604839	0.0556065
V$E2F1DP1_01	Forskolin	113	-0.169951	-2.05335	0.00201613	0.0547638
V$ELK1_01	Forskolin	114	-0.160134	-2.01561	0.00612245	0.066412
TCTGATC,MIR-383	Forskolin	34	-0.285199	-1.98664	0.00606061	0.0758354
V$E2F1_Q6	Forskolin	116	-0.157525	-1.96289	0.00192308	0.0856851
V$STAT1_02	Forskolin	122	-0.150856	-1.95392	0	0.086864
CTTTGCA,MIR-527	Forskolin	159	-0.13227	-1.95014	0.0103734	0.0861963
TGCCTTA,MIR-124A	Forskolin	376	-0.0857087	-1.9402	0.0117417	0.0890081
V$ELK1_02	Forskolin	123	-0.149319	-1.92243	0.0104384	0.0958778
V$EFC_Q6	Forskolin	158	-0.130121	-1.90544	0.014	0.101423
TTCNRGNNNNTTC_V$HSF_Q6	Forskolin	84	-0.173565	-1.88029	0.00413223	0.112449
TAGCTTT,MIR-9	Forskolin	162	-0.126694	-1.86421	0.00779727	0.1205
GTGACGY_V$E4F1_Q6	Forskolin	329	-0.0883565	-1.85823	0.0122699	0.121775
V$STAT1_03	Forskolin	122	-0.139091	-1.84647	0.0125261	0.126852
V$E2F1_Q3	Forskolin	115	-0.14406	-1.84366	0.011236	0.12567
CTCTGGA,MIR-520A,MIR-525	Forskolin	95	-0.158761	-1.83934	0.00630252	0.125392
V$MYCMAX_01	Forskolin	125	-0.138685	-1.82348	0.01417	0.13397
AAGCACT,MIR-520F	Forskolin	156	-0.12384	-1.81316	0.00998004	0.138298
GTGCCTT,MIR-506	Forskolin	450	-0.0751638	-1.81147	0.00612245	0.136475
ATCATGA,MIR-433	Forskolin	84	-0.167042	-1.79142	0.0218254	0.148729
V$TATA_01	Forskolin	137	-0.131286	-1.76971	0.0245399	0.162636
AATGGAG,MIR-136	Forskolin	49	-0.214331	-1.7625	0.0204499	0.165351
V$MAX_01	Forskolin	137	-0.12607	-1.75001	0.0241935	0.17313
AAACCAC,MIR-140	Forskolin	65	-0.182066	-1.74597	0.0257937	0.172823
V$USF_02	Forskolin	142	-0.126302	-1.74482	0.0300601	0.170501
V$CETS1P54_01	Forskolin	107	-0.144967	-1.74154	0.0136986	0.170191
V$NKX25_01	Forskolin	69	-0.178186	-1.73662	0.0244399	0.171383
ACTGCAG,MIR-17-3P	Forskolin	71	-0.170851	-1.7303	0.0285171	0.173661
V$STAT5A_04	Forskolin	111	-0.139132	-1.72206	0.0212766	0.178522
GTAAACC,MIR-299-5P	Forskolin	26	-0.273159	-1.7015	0.0326531	0.194134
V$E2F_Q3	Forskolin	110	-0.138606	-1.69791	0.0230326	0.194358
V$TTF1_Q6	Forskolin	139	-0.121839	-1.69027	0.0227704	0.198734
GCTTGAA,MIR-498	Forskolin	83	-0.156381	-1.66281	0.0371901	0.224174
AACTGGA,MIR-145	Forskolin	153	-0.118521	-1.66024	0.02079	0.223137
V$E47_02	Forskolin	129	-0.126022	-1.64944	0.0345528	0.231085
GGCKCATGS_UNKNOWN	Forskolin	35	-0.236567	-1.64822	0.0276134	0.228587
V$HNF6_Q6	Forskolin	145	-0.117811	-1.64575	0.0470348	0.227921
V$AREB6_03	Forskolin	124	-0.126428	-1.63358	0.0419162	0.237764
ACTGTGA,MIR-27A,MIR-27B	Forskolin	315	-0.0797334	-1.62984	0.0344828	0.238316
V$ARNT_02	Forskolin	122	-0.12336	-1.61843	0.0354331	0.247572
TGCACTT,MIR-519C,MIR-519B,MIR-519A	Forskolin	289	-0.0823123	-1.60652	0.0500963	0.257684
ACACTGG,MIR-199A,MIR-199B	Forskolin	102	-0.137688	-1.60589	0.034	0.254797
V$E2F1_Q4_01	Forskolin	120	-0.12648	-1.60387	0.0366599	0.253597
V$CEBP_Q2	Forskolin	141	-0.111591	-1.56323	0.0612245	0.303341
V$OSF2_Q6	Forskolin	137	-0.114301	-1.56229	0.0483871	0.300375
AGGAAGC,MIR-516-3P	Forskolin	66	-0.161312	-1.56155	0.0496894	0.297448
V$NKX22_01	Forskolin	113	-0.125634	-1.56074	0.0590631	0.294405
V$E2F_Q2	Forskolin	94	-0.141065	-1.55545	0.0523139	0.297791
V$GR_Q6	Forskolin	143	-0.112905	-1.5544	0.0456432	0.295331
ATGTTTC,MIR-494	Forskolin	103	-0.130172	-1.54531	0.0469388	0.303721
V$CREB_01	Forskolin	141	-0.111108	-1.54266	0.0596421	0.303452
GCATTTG,MIR-105	Forskolin	121	-0.120473	-1.53919	0.0638723	0.304101
AGCACTT,MIR-93,MIR-302A,MIR-302B,MIR-302C,MIR-302D,MIR-372,MIR-373,MIR-520E,MIR-520A,MIR-526B,MIR-520B,MIR-520C,MIR-520D	Forskolin	207	-0.0919086	-1.53591	0.057971	0.305203
RYTGCNNRGNAAC_V$MIF1_01	Forskolin	37	-0.21239	-1.53457	0.0591716	0.303206
V$ARNT_01	Forskolin	142	-0.110407	-1.53141	0.0694445	0.303887
V$PAX_Q6	Forskolin	134	-0.11394	-1.5285	0.0572034	0.304086
V$MYCMAX_03	Forskolin	137	-0.113363	-1.52417	0.0632911	0.30629
GTTAAAG,MIR-302B	Forskolin	49	-0.182496	-1.51657	0.0704501	0.312948
CACTGTG,MIR-128A,MIR-128B	Forskolin	208	-0.0867855	-1.50811	0.0501931	0.320745
CATTTCA,MIR-203	Forskolin	187	-0.0928467	-1.5054	0.0626223	0.320975
AACYNNNNTTCCS_UNKNOWN	Forskolin	44	-0.192923	-1.49394	0.0670611	0.333798
V$ETS_Q4	Forskolin	103	-0.122568	-1.49166	0.072549	0.333103
V$CEBP_C	Forskolin	117	-0.117452	-1.49128	0.0793991	0.329929
YTCCCRNNAGGY_UNKNOWN	Forskolin	36	-0.210354	-1.47367	0.078	0.35249
AACATTC,MIR-409-3P	Forskolin	104	-0.123019	-1.47319	0.0823755	0.34943
GCAAAAA,MIR-129	Forskolin	118	-0.115259	-1.47282	0.0813492	0.346299
V$MYOGENIN_Q6	Forskolin	119	-0.117805	-1.47161	0.0790598	0.344185
GTACTGT,MIR-101	Forskolin	184	-0.0936992	-1.4692	0.0939335	0.343734
GGCNRNWCTTYS_UNKNOWN	Forskolin	40	-0.193186	-1.46399	0.0791075	0.347737
ATAGGAA,MIR-202	Forskolin	74	-0.141441	-1.46357	0.0762887	0.344888
ACCAAAG,MIR-9	Forskolin	339	-0.0688616	-1.46094	0.07173	0.344941
V$CREB_02	Forskolin	139	-0.108271	-1.45993	0.0921569	0.3428
ATCTTGC,MIR-31	Forskolin	44	-0.188922	-1.4523	0.0907372	0.350563
V$E2F_Q3_01	Forskolin	121	-0.11454	-1.44844	0.0858283	0.352764
V$PITX2_Q2	Forskolin	150	-0.100602	-1.43928	0.0883534	0.363614
TTANWNANTGGM_UNKNOWN	Forskolin	39	-0.190522	-1.43557	0.0755102	0.36569
ACACTAC,MIR-142-3P	Forskolin	85	-0.131486	-1.41607	0.101626	0.393308
YGCGYRCGC_UNKNOWN	Forskolin	147	-0.100778	-1.40947	0.097166	0.400348
V$FOXJ2_02	Forskolin	138	-0.101733	-1.40558	0.0948454	0.403111
KTGGYRSGAA_UNKNOWN	Forskolin	41	-0.182429	-1.40205	0.102881	0.405314
CACCAGC,MIR-138	Forskolin	125	-0.106609	-1.40203	0.101626	0.401546
V$FXR_Q3	Forskolin	60	-0.149352	-1.39693	0.0938776	0.406085
V$MYCMAX_02	Forskolin	148	-0.0986602	-1.3965	0.0918367	0.403118
V$SREBP1_01	Forskolin	89	-0.124852	-1.39106	0.10757	0.40888
V$HNF3ALPHA_Q6	Forskolin	123	-0.109418	-1.38488	0.110442	0.415968
V$E2A_Q2	Forskolin	116	-0.110637	-1.3846	0.122984	0.412619
WWTAAGGC_UNKNOWN	Forskolin	76	-0.136757	-1.38409	0.11546	0.409917
V$E2F_01	Forskolin	40	-0.182665	-1.37935	0.0964567	0.414309
RGTTAMWNATT_V$HNF1_01	Forskolin	38	-0.183408	-1.37463	0.106	0.41849
ACTACCT,MIR-196A,MIR-196B	Forskolin	84	-0.129252	-1.37334	0.114504	0.417141
CACTGCC,MIR-34A,MIR-34C,MIR-449	Forskolin	171	-0.0902652	-1.37297	0.112205	0.414286
AAGGGAT,MIR-188	Forskolin	52	-0.162207	-1.36966	0.130064	0.416245
GCTGAGT,MIR-512-5P	Forskolin	27	-0.217658	-1.36505	0.128773	0.420662
V$NFKAPPAB_01	Forskolin	101	-0.110792	-1.36275	0.114053	0.420906
V$OLF1_01	Forskolin	126	-0.104975	-1.36133	0.110656	0.42001
V$STAT1_01	Forskolin	37	-0.186869	-1.36018	0.117284	0.418323
ATGCAGT,MIR-217	Forskolin	73	-0.134266	-1.35817	0.116412	0.417956
V$SRF_01	Forskolin	26	-0.22369	-1.35722	0.122047	0.416057
V$CREBP1CJUN_01	Forskolin	147	-0.094773	-1.35287	0.124016	0.420044
V$CEBPA_01	Forskolin	142	-0.0955429	-1.34965	0.118	0.422153
V$ISRE_01	Forskolin	116	-0.106296	-1.3474	0.13253	0.422849
GGCACTT,MIR-519E	Forskolin	76	-0.132648	-1.34691	0.145098	0.420496
AAGCACA,MIR-218	Forskolin	256	-0.073619	-1.34635	0.154599	0.418146
YYCATTCAWW_UNKNOWN	Forskolin	111	-0.109133	-1.34432	0.122449	0.41841
CTCAAGA,MIR-526B	Forskolin	43	-0.175696	-1.34179	0.162055	0.419029
GACTGTT,MIR-212,MIR-132	Forskolin	106	-0.111572	-1.34176	0.135135	0.415942
CATRRAGC_UNKNOWN	Forskolin	75	-0.130214	-1.33905	0.146154	0.417503
V$MTF1_Q4	Forskolin	132	-0.0997476	-1.33725	0.145349	0.41731
AGGCACT,MIR-515-3P	Forskolin	56	-0.148196	-1.32831	0.12766	0.42862
AATGTGA,MIR-23A,MIR-23B	Forskolin	282	-0.0702314	-1.32048	0.149905	0.438863
YRTCANNRCGC_UNKNOWN	Forskolin	40	-0.176531	-1.31727	0.158859	0.441237
GTGCAAA,MIR-507	Forskolin	92	-0.118931	-1.31655	0.141717	0.439389
V$AP2_Q6	Forskolin	133	-0.0966095	-1.3144	0.153846	0.440008
V$ETS2_B	Forskolin	137	-0.0966027	-1.30528	0.148536	0.453622
V$HTF_01	Forskolin	36	-0.183207	-1.29704	0.174897	0.465756
V$STAT4_01	Forskolin	141	-0.0933061	-1.2935	0.153689	0.468738
MCAATNNNNNGCG_UNKNOWN	Forskolin	47	-0.163857	-1.29266	0.169014	0.466984
ACTTTAT,MIR-142-5P	Forskolin	204	-0.0772984	-1.29237	0.181996	0.464293
GACAGGG,MIR-339	Forskolin	38	-0.175705	-1.28578	0.146154	0.473124
TGANNYRGCA_V$TCF11MAFG_01	Forskolin	156	-0.0875765	-1.28315	0.158317	0.474241
TGAATGT,MIR-181A,MIR-181B,MIR-181C,MIR-181D	Forskolin	326	-0.0612013	-1.28097	0.163065	0.47475
V$ATF3_Q6	Forskolin	133	-0.0942425	-1.27594	0.170683	0.480144
GKCGCNNNNNNNTGAYG_UNKNOWN	Forskolin	34	-0.180673	-1.27166	0.163755	0.484707
ACATTCC,MIR-1,MIR-206	Forskolin	202	-0.0762326	-1.27106	0.189796	0.482538
V$LMO2COM_01	Forskolin	124	-0.099436	-1.26906	0.179641	0.482957
V$CREB_Q2	Forskolin	140	-0.0921148	-1.2598	0.200828	0.497484
GGCCAGT,MIR-193A,MIR-193B	Forskolin	59	-0.141355	-1.25971	0.175097	0.494333
TATCTGG,MIR-488	Forskolin	38	-0.172761	-1.25676	0.190945	0.496684
TGCTGAY_UNKNOWN	Forskolin	285	-0.0633223	-1.25605	0.193916	0.494713
YGACNNYACAR_UNKNOWN	Forskolin	43	-0.162654	-1.24875	0.190678	0.504772
V$HNF4_01	Forskolin	142	-0.0879245	-1.24828	0.192385	0.502448
ACTGAAA,MIR-30A-3P,MIR-30E-3P	Forskolin	131	-0.0935153	-1.24348	0.171674	0.50779
V$CREL_01	Forskolin	118	-0.10009	-1.24101	0.225296	0.509051
V$USF_Q6_01	Forskolin	114	-0.0995914	-1.24074	0.183468	0.506399
V$MYCMAX_B	Forskolin	133	-0.0928153	-1.23952	0.174603	0.505342
V$NRF2_Q4	Forskolin	137	-0.0905506	-1.23811	0.192469	0.504685
CTTGTAT,MIR-381	Forskolin	139	-0.0903271	-1.236	0.207392	0.505293
CCTGTGA,MIR-513	Forskolin	66	-0.128508	-1.23499	0.209677	0.504094
V$SP1_Q2_01	Forskolin	124	-0.0932846	-1.23243	0.209877	0.505739
SNACANNNYSYAGA_UNKNOWN	Forskolin	35	-0.174636	-1.22781	0.195876	0.511472
V$PPARG_01	Forskolin	25	-0.205273	-1.22766	0.213552	0.508768
V$ATF4_Q2	Forskolin	134	-0.0900539	-1.227	0.224101	0.506994
WTGAAAT_UNKNOWN	Forskolin	341	-0.0582987	-1.22423	0.216162	0.50932
V$SP1_Q6_01	Forskolin	99	-0.105248	-1.22375	0.209163	0.50713
RRCCGTTA_UNKNOWN	Forskolin	36	-0.17161	-1.21582	0.239845	0.519194
GTGCCAA,MIR-96	Forskolin	192	-0.0766628	-1.21342	0.189583	0.520521
V$CREB_Q4	Forskolin	140	-0.0886614	-1.20746	0.22158	0.52862
V$AP1_Q4_01	Forskolin	140	-0.0864019	-1.20597	0.216797	0.528587
TTTGTAG,MIR-520D	Forskolin	228	-0.0692717	-1.20153	0.204124	0.533784
V$HSF_Q6	Forskolin	97	-0.10337	-1.19983	0.24	0.533957
CTACTAG,MIR-325	Forskolin	15	-0.251161	-1.19509	0.221757	0.539996
ATCMNTCCGY_UNKNOWN	Forskolin	29	-0.185961	-1.19432	0.241036	0.538458
TCCCRNNRTGC_UNKNOWN	Forskolin	92	-0.105146	-1.19313	0.226611	0.537464
V$LXR_Q3	Forskolin	38	-0.158352	-1.18935	0.216599	0.541593
V$E4F1_Q6	Forskolin	137	-0.0882647	-1.18436	0.244635	0.547854
V$WHN_B	Forskolin	140	-0.0853418	-1.18059	0.254864	0.55206
TAANNYSGCG_UNKNOWN	Forskolin	40	-0.157437	-1.17158	0.238901	0.56655
V$OCT1_04	Forskolin	133	-0.086546	-1.16831	0.264259	0.569702
TCATCTC,MIR-143	Forskolin	99	-0.0980158	-1.16781	0.250513	0.567495
TTTNNANAGCYR_UNKNOWN	Forskolin	53	-0.140579	-1.16683	0.257606	0.566446
V$CDP_01	Forskolin	49	-0.142834	-1.16219	0.255319	0.572241
V$YY1_01	Forskolin	141	-0.0840266	-1.15456	0.258449	0.584351
TGACGTCA_V$ATF3_Q6	Forskolin	125	-0.0899482	-1.15164	0.279592	0.587023
V$SPZ1_01	Forskolin	125	-0.0884629	-1.14999	0.265347	0.58727
V$NFY_01	Forskolin	134	-0.0856437	-1.14858	0.278557	0.586952
CCAGGTT,MIR-490	Forskolin	35	-0.159635	-1.14597	0.27621	0.58908
GTAGGCA,MIR-189	Forskolin	18	-0.220115	-1.14222	0.265306	0.593139
V$SMAD3_Q6	Forskolin	113	-0.0929101	-1.14206	0.271154	0.590419
RACCACAR_V$AML_Q6	Forskolin	133	-0.0858341	-1.13798	0.293139	0.594973
V$PPARA_01	Forskolin	21	-0.210728	-1.13275	0.315574	0.602398
V$AHR_Q5	Forskolin	101	-0.095097	-1.12596	0.303922	0.612849
V$CIZ_01	Forskolin	127	-0.0863883	-1.121	0.307692	0.62006
V$NFY_C	Forskolin	124	-0.0877199	-1.12055	0.292	0.617908
TTTTGAG,MIR-373	Forskolin	153	-0.0789201	-1.11955	0.295547	0.616772
V$CDC5_01	Forskolin	160	-0.0766717	-1.11757	0.317073	0.618021
GCGSCMNTTT_UNKNOWN	Forskolin	33	-0.159009	-1.11456	0.300403	0.620921
ATGTTAA,MIR-302C	Forskolin	170	-0.0743081	-1.11051	0.32	0.626215
V$ZIC3_01	Forskolin	143	-0.0780623	-1.10994	0.319058	0.624338
V$DR1_Q3	Forskolin	120	-0.0842571	-1.10926	0.322709	0.622676
V$AP1_C	Forskolin	154	-0.0776701	-1.10789	0.337423	0.622443
ATAACCT,MIR-154	Forskolin	39	-0.149605	-1.10607	0.306773	0.623091
ATTACAT,MIR-380-3P	Forskolin	76	-0.107372	-1.10448	0.332669	0.623078
CCAATNNSNNNGCG_UNKNOWN	Forskolin	35	-0.161087	-1.10319	0.320911	0.622851
TAATGTG,MIR-323	Forskolin	116	-0.0869046	-1.10037	0.334653	0.625604
V$NFY_Q6_01	Forskolin	124	-0.0827879	-1.09706	0.314286	0.628985
V$ETF_Q6	Forskolin	60	-0.123686	-1.09674	0.315151	0.626669
V$E2F1_Q3_01	Forskolin	125	-0.0847247	-1.09646	0.310976	0.624318
ACCATTT,MIR-522	Forskolin	116	-0.0868268	-1.09222	0.343558	0.630556
CCAWNWWNNNGGC_UNKNOWN	Forskolin	41	-0.140665	-1.09178	0.331439	0.628622
GGAMTNNNNNTCCY_UNKNOWN	Forskolin	56	-0.12576	-1.09165	0.335807	0.625931
AAGCCAT,MIR-135A,MIR-135B	Forskolin	216	-0.0635799	-1.08415	0.327236	0.638042
V$MEF2_04	Forskolin	15	-0.231532	-1.08141	0.339216	0.640923
CTCCAAG,MIR-432	Forskolin	45	-0.137622	-1.07241	0.355086	0.656533
ACAWYAAAG_UNKNOWN	Forskolin	62	-0.115862	-1.07061	0.358566	0.657046
GAANYNYGACNY_UNKNOWN	Forskolin	32	-0.15666	-1.06736	0.353877	0.660739
ATACTGT,MIR-144	Forskolin	143	-0.0767233	-1.06504	0.379771	0.662512
V$NERF_Q2	Forskolin	122	-0.0816819	-1.06322	0.360784	0.663205
V$SRF_Q6	Forskolin	132	-0.0798688	-1.06265	0.343284	0.661392
V$POU3F2_02	Forskolin	147	-0.0739026	-1.06057	0.372781	0.662723
GGTGTGT,MIR-329	Forskolin	62	-0.11419	-1.05572	0.383673	0.669972
V$USF2_Q6	Forskolin	124	-0.080556	-1.04829	0.375246	0.681628
V$PAX4_02	Forskolin	148	-0.0747746	-1.04741	0.394191	0.680472
CAGCCTC,MIR-485-5P	Forskolin	74	-0.106322	-1.04637	0.375	0.679427
V$NFKAPPAB65_01	Forskolin	105	-0.0865779	-1.03663	0.380478	0.696479
GGGNRMNNYCAT_UNKNOWN	Forskolin	46	-0.128241	-1.03393	0.40481	0.698909
GTGCCAT,MIR-183	Forskolin	127	-0.078999	-1.03328	0.400379	0.697238
V$SMAD4_Q6	Forskolin	113	-0.083409	-1.03115	0.395303	0.698724
V$CREB_Q2_01	Forskolin	123	-0.0777449	-1.02903	0.402041	0.700008
GCAAGAC,MIR-431	Forskolin	31	-0.153555	-1.02674	0.421569	0.701618
TTGCACT,MIR-130A,MIR-301,MIR-130B	Forskolin	273	-0.054393	-1.02672	0.392562	0.698703
TAATAAT,MIR-126	Forskolin	144	-0.0739779	-1.02502	0.433594	0.699342
V$CDP_02	Forskolin	64	-0.111835	-1.0233	0.416174	0.699817
ACAGGGT,MIR-10A,MIR-10B	Forskolin	93	-0.0912661	-1.02187	0.402	0.699805
V$AFP1_Q6	Forskolin	147	-0.0731652	-1.01739	0.435052	0.705982
V$SP3_Q3	Forskolin	121	-0.0791326	-1.01581	0.415058	0.706096
AGTTCTC,MIR-146A,MIR-146B	Forskolin	40	-0.137361	-1.01346	0.419422	0.708004
V$HMX1_01	Forskolin	20	-0.190353	-1.01314	0.411273	0.705761
V$ICSBP_Q6	Forskolin	137	-0.074166	-1.00958	0.43787	0.710303
TGCACTG,MIR-148A,MIR-152,MIR-148B	Forskolin	192	-0.0628225	-1.00933	0.418	0.707825
TCTATGA,MIR-376A,MIR-376B	Forskolin	60	-0.110202	-1.00909	0.448343	0.705458
CTACCTC,LET-7A,LET-7B,LET-7C,LET-7D,LET-7E,LET-7F,MIR-98,LET-7G,LET-7I	Forskolin	229	-0.0580216	-1.00706	0.428287	0.707051
V$IRF2_01	Forskolin	65	-0.106702	-1.00354	0.434442	0.711215
RGAGGAARY_V$PU1_Q6	Forskolin	248	-0.0549077	-0.99995	0.453608	0.715959
V$PBX1_02	Forskolin	86	-0.0917651	-0.999255	0.44586	0.71447
ATTCTTT,MIR-186	Forskolin	174	-0.064658	-0.99849	0.420118	0.713148
CTCNANGTGNY_UNKNOWN	Forskolin	44	-0.127218	-0.993988	0.45509	0.719789
YWATTWNNRGCT_UNKNOWN	Forskolin	36	-0.141651	-0.992686	0.450397	0.71965
V$ATF6_01	Forskolin	62	-0.105175	-0.990758	0.441176	0.720782
V$NKX3A_01	Forskolin	118	-0.0771542	-0.990669	0.461373	0.718138
CGTSACG_V$PAX3_B	Forskolin	81	-0.0931634	-0.990479	0.438247	0.715733
V$HP1SITEFACTOR_Q6	Forskolin	134	-0.0738975	-0.988443	0.461538	0.717063
GTATGAT,MIR-154,MIR-487	Forskolin	46	-0.12127	-0.987875	0.447034	0.715387
V$IRF1_Q6	Forskolin	144	-0.0714459	-0.986757	0.451866	0.714826
V$AP4_Q6_01	Forskolin	135	-0.0715309	-0.980104	0.470472	0.725177
V$MYOGNF1_01	Forskolin	25	-0.162069	-0.978941	0.445098	0.724796
GAGCTGG,MIR-337	Forskolin	84	-0.0904669	-0.975017	0.474	0.729766
GGCAGAC,MIR-346	Forskolin	23	-0.168809	-0.973745	0.471215	0.729576
V$CEBPB_01	Forskolin	145	-0.0698547	-0.972451	0.477083	0.729671
V$GATA4_Q3	Forskolin	138	-0.0692951	-0.971454	0.457305	0.728919
V$TEL2_Q6	Forskolin	91	-0.0858704	-0.970516	0.470588	0.727966
V$MYB_Q3	Forskolin	125	-0.0755966	-0.968939	0.476954	0.728341
GGCAGCT,MIR-22	Forskolin	152	-0.0691725	-0.967316	0.491493	0.728925
V$CREBP1_Q2	Forskolin	128	-0.0739571	-0.963778	0.480885	0.733042
V$MYB_Q5_01	Forskolin	139	-0.0706246	-0.963233	0.470226	0.731322
TTAYRTAA_V$E4BP4_01	Forskolin	149	-0.0673735	-0.962253	0.463563	0.730723
GAGCCAG,MIR-149	Forskolin	91	-0.0862696	-0.953645	0.494163	0.745315
YRCCAKNNGNCGC_UNKNOWN	Forskolin	35	-0.133444	-0.953445	0.488613	0.742948
V$AP1_Q6_01	Forskolin	131	-0.0715569	-0.947535	0.507277	0.752053
V$ZID_01	Forskolin	124	-0.0729896	-0.942605	0.528184	0.759179
V$PAX8_B	Forskolin	57	-0.105272	-0.934176	0.509259	0.772976
V$EGR_Q6	Forskolin	144	-0.0683397	-0.928431	0.510417	0.782013
V$ATF_01	Forskolin	136	-0.0666071	-0.92405	0.520325	0.787937
GGCNKCCATNK_UNKNOWN	Forskolin	67	-0.0952486	-0.923326	0.539683	0.786568
V$NFKB_Q6_01	Forskolin	102	-0.0765377	-0.92147	0.56875	0.7877
WGTTNNNNNAAA_UNKNOWN	Forskolin	303	-0.0452029	-0.920745	0.541426	0.786393
V$EN1_01	Forskolin	61	-0.0992755	-0.920569	0.553971	0.783973
V$MYOD_01	Forskolin	137	-0.0684163	-0.916777	0.556436	0.788743
GTCAGGA,MIR-378	Forskolin	30	-0.144421	-0.914115	0.547521	0.791043
V$HNF4_Q6	Forskolin	125	-0.0703181	-0.91323	0.538153	0.789889
V$CREB_Q4_01	Forskolin	113	-0.0718824	-0.909612	0.546906	0.794121
AGCYRWTTC_UNKNOWN	Forskolin	59	-0.101222	-0.908642	0.557312	0.793262
V$TATA_C	Forskolin	169	-0.0579918	-0.903595	0.587361	0.800687
ATGTCAC,MIR-489	Forskolin	58	-0.101112	-0.901546	0.569937	0.801701
V$AHRARNT_01	Forskolin	75	-0.0885056	-0.90028	0.552894	0.801359
V$NFY_Q6	Forskolin	125	-0.0701823	-0.899261	0.57438	0.800584
AACWWCAANK_UNKNOWN	Forskolin	69	-0.0951654	-0.896333	0.580247	0.803657
TCTAGAG,MIR-517	Forskolin	29	-0.136323	-0.895843	0.571429	0.801985
GGTAACC,MIR-409-5P	Forskolin	24	-0.152986	-0.89319	0.551724	0.804427
V$AP1_Q2_01	Forskolin	135	-0.0643875	-0.892786	0.571429	0.802503
YAATNRNNNYNATT_UNKNOWN	Forskolin	57	-0.0984449	-0.892297	0.590129	0.800772
V$PPAR_DR1_Q2	Forskolin	130	-0.0678849	-0.89198	0.565657	0.798676
GGGCATT,MIR-365	Forskolin	81	-0.0843322	-0.889015	0.594262	0.801778
V$MEIS1AHOXA9_01	Forskolin	64	-0.0927397	-0.887389	0.585271	0.802244
GTTTGTT,MIR-495	Forskolin	158	-0.0596047	-0.886368	0.608696	0.801521
V$MZF1_01	Forskolin	117	-0.0686772	-0.88579	0.578411	0.799947
V$EVI1_02	Forskolin	72	-0.088597	-0.885255	0.569201	0.798388
GTTATAT,MIR-410	Forskolin	76	-0.0866218	-0.884977	0.571429	0.796288
V$PTF1BETA_Q6	Forskolin	126	-0.0700254	-0.884029	0.606786	0.795411
AAGCAAT,MIR-137	Forskolin	141	-0.0639791	-0.882708	0.586207	0.795363
GCTCTTG,MIR-335	Forskolin	55	-0.0998511	-0.88245	0.58215	0.793314
V$HNF4_01_B	Forskolin	128	-0.0669649	-0.882237	0.618395	0.791146
TTGGGAG,MIR-150	Forskolin	51	-0.104646	-0.880036	0.600414	0.792799
V$USF_Q6	Forskolin	125	-0.0677913	-0.878242	0.593047	0.793538
V$PAX5_01	Forskolin	91	-0.0783216	-0.877532	0.598113	0.792352
V$HEN1_02	Forskolin	91	-0.0783905	-0.876144	0.591876	0.792491
TGTTTGY_V$HNF3_Q6	Forskolin	407	-0.0368601	-0.869305	0.623574	0.802791
V$TST1_01	Forskolin	146	-0.061629	-0.863379	0.614173	0.81124
V$MEIS1BHOXA9_01	Forskolin	79	-0.0822529	-0.853646	0.632411	0.82712
KMCATNNWGGA_UNKNOWN	Forskolin	52	-0.0988225	-0.851555	0.655936	0.828424
V$ZF5_B	Forskolin	131	-0.0636248	-0.851175	0.615226	0.826566
TAGGTCA,MIR-192,MIR-215	Forskolin	33	-0.12392	-0.849414	0.633588	0.827163
STTTCRNTTT_V$IRF_Q6	Forskolin	98	-0.0725572	-0.847694	0.626894	0.827638
TCCATTKW_UNKNOWN	Forskolin	130	-0.0633396	-0.84639	0.66004	0.827454
V$HIF1_Q5	Forskolin	135	-0.0631076	-0.844412	0.656189	0.828276
V$STAT6_02	Forskolin	134	-0.06268	-0.843811	0.65261	0.826782
V$E47_01	Forskolin	140	-0.0609713	-0.843321	0.650888	0.8251
V$MAF_Q6	Forskolin	143	-0.0613451	-0.842598	0.637965	0.823958
WTTGKCTG_UNKNOWN	Forskolin	278	-0.044668	-0.836676	0.660338	0.831959
GTCAACC,MIR-380-5P	Forskolin	15	-0.179391	-0.835224	0.682105	0.832091
V$TGIF_01	Forskolin	130	-0.0621539	-0.832072	0.688235	0.834997
CTCTAGA,MIR-526C,MIR-518F,MIR-526A	Forskolin	32	-0.12265	-0.830341	0.670125	0.835525
CCACACA,MIR-147	Forskolin	44	-0.104394	-0.82915	0.68008	0.835108
YAATNANRNNNCAG_UNKNOWN	Forskolin	38	-0.114415	-0.825415	0.692946	0.839139
V$PAX3_B	Forskolin	49	-0.0971184	-0.816996	0.693416	0.851364
TCCAGAG,MIR-518C	Forskolin	81	-0.077497	-0.814516	0.689861	0.853061
V$GFI1_01	Forskolin	142	-0.0593159	-0.81104	0.714579	0.856489
V$SP1_Q6	Forskolin	120	-0.0630377	-0.807144	0.695565	0.860853
V$MZF1_02	Forskolin	122	-0.0623756	-0.804361	0.702335	0.863227
V$IRF_Q6	Forskolin	121	-0.0630907	-0.802545	0.727455	0.863813
V$NMYC_01	Forskolin	138	-0.0582508	-0.800636	0.692308	0.864626
AGGGCAG,MIR-18A	Forskolin	78	-0.0771003	-0.799983	0.73428	0.863297
V$CREBP1_01	Forskolin	103	-0.0689934	-0.79661	0.71619	0.866585
CAGCTTT,MIR-320	Forskolin	163	-0.0521255	-0.795534	0.725971	0.865779
ACTGCCT,MIR-34B	Forskolin	138	-0.058909	-0.795469	0.703488	0.86334
V$ARP1_01	Forskolin	83	-0.0729834	-0.792702	0.71831	0.865357
TTCYRGAA_UNKNOWN	Forskolin	172	-0.0528284	-0.791658	0.755511	0.864469
V$SOX9_B1	Forskolin	150	-0.0550843	-0.791167	0.723658	0.862734
WGGAATGY_V$TEF1_Q6	Forskolin	197	-0.0470843	-0.780256	0.722441	0.878148
V$STAT3_02	Forskolin	70	-0.0787066	-0.777512	0.761523	0.879973
V$GATA1_01	Forskolin	130	-0.0574924	-0.773692	0.74359	0.883584
V$HSF2_01	Forskolin	129	-0.059084	-0.773139	0.736634	0.881942
V$TEF1_Q6	Forskolin	120	-0.0622114	-0.770259	0.764092	0.884104
V$POU6F1_01	Forskolin	141	-0.0564642	-0.76994	0.760563	0.882064
CTGAGCC,MIR-24	Forskolin	126	-0.0587511	-0.766786	0.744048	0.884461
V$HAND1E47_01	Forskolin	152	-0.0527478	-0.766672	0.748988	0.882162
AGCTCCT,MIR-28	Forskolin	44	-0.0982678	-0.763241	0.76	0.885215
V$PAX2_02	Forskolin	146	-0.0538515	-0.760093	0.775794	0.887677
V$EGR1_01	Forskolin	129	-0.0567132	-0.757391	0.771429	0.889602
V$SRF_Q5_01	Forskolin	120	-0.0597602	-0.75629	0.769524	0.888764
GGTGAAG,MIR-412	Forskolin	40	-0.0998474	-0.746386	0.803644	0.901063
V$TCF4_Q5	Forskolin	134	-0.0554563	-0.745687	0.807615	0.899583
ACTGTAG,MIR-139	Forskolin	87	-0.0675536	-0.744203	0.793173	0.899369
CTGYNNCTYTAA_UNKNOWN	Forskolin	47	-0.0916025	-0.739196	0.804979	0.904393
V$NGFIC_01	Forskolin	123	-0.0570239	-0.736648	0.808943	0.905783
V$COUP_01	Forskolin	131	-0.0541915	-0.734105	0.804	0.90707
TNCATNTCCYR_UNKNOWN	Forskolin	62	-0.0794261	-0.728052	0.782779	0.91334
V$T3R_Q6	Forskolin	113	-0.0581149	-0.726145	0.812741	0.913514
GGGNNTTTCC_V$NFKB_Q6_01	Forskolin	68	-0.0762835	-0.724651	0.815534	0.913224
CACGTTT,MIR-302A	Forskolin	18	-0.141635	-0.724418	0.800789	0.911013
YGTCCTTGR_UNKNOWN	Forskolin	55	-0.0843432	-0.721628	0.801653	0.912516
V$FOXO1_02	Forskolin	139	-0.0536223	-0.720319	0.824197	0.911727
GTGTGAG,MIR-342	Forskolin	41	-0.0968096	-0.716997	0.826613	0.913866
AGGTGCA,MIR-500	Forskolin	64	-0.0782756	-0.716695	0.82505	0.911757
V$EGR2_01	Forskolin	102	-0.0610883	-0.715085	0.831663	0.911572
TGASTMAGC_V$NFE2_01	Forskolin	103	-0.0599604	-0.710546	0.828063	0.915151
V$RORA1_01	Forskolin	147	-0.0494374	-0.700849	0.866667	0.925574
RNCTGNYNRNCTGNY_UNKNOWN	Forskolin	32	-0.104321	-0.696287	0.842742	0.928906
ACAACCT,MIR-453	Forskolin	28	-0.109503	-0.691235	0.850807	0.932611
V$LEF1_Q6	Forskolin	151	-0.0473264	-0.682445	0.878099	0.940794
TGAGATT,MIR-216	Forskolin	78	-0.0664545	-0.681972	0.844444	0.938931
V$PU1_Q6	Forskolin	114	-0.0544628	-0.678423	0.885772	0.940668
CCCNNNNNNAAGWT_UNKNOWN	Forskolin	52	-0.0801625	-0.676956	0.853608	0.939839
V$ZF5_01	Forskolin	124	-0.0532871	-0.67652	0.869835	0.937798
V$SMAD_Q6	Forskolin	137	-0.0492308	-0.673245	0.882979	0.939255
V$FREAC2_01	Forskolin	139	-0.0500892	-0.671719	0.875502	0.938643
V$AR_Q6	Forskolin	126	-0.0505342	-0.670957	0.90121	0.937115
V$ELF1_Q6	Forskolin	116	-0.0535733	-0.66972	0.860236	0.936075
V$EGR3_01	Forskolin	38	-0.0905551	-0.66629	0.854839	0.937458
CACTTTG,MIR-520G,MIR-520H	Forskolin	146	-0.0472351	-0.658701	0.864865	0.943204
CCTGAGT,MIR-510	Forskolin	26	-0.10841	-0.657102	0.889328	0.942506
V$COREBINDINGFACTOR_Q6	Forskolin	135	-0.0482397	-0.648958	0.895161	0.948578
TCTGGAC,MIR-198	Forskolin	49	-0.0780578	-0.6418	0.918669	0.953285
V$AR_Q2	Forskolin	73	-0.0638208	-0.63791	0.907598	0.954597
CRGAARNNNNCGA_UNKNOWN	Forskolin	25	-0.10632	-0.634652	0.916501	0.955336
CCAWYNNGAAR_UNKNOWN	Forskolin	80	-0.0604486	-0.629557	0.90998	0.957554
V$NFAT_Q6	Forskolin	144	-0.0455345	-0.629553	0.923077	0.955119
TGACAGNY_V$MEIS1_01	Forskolin	462	-0.0252361	-0.619209	0.937247	0.961813
GTCNYYATGR_UNKNOWN	Forskolin	53	-0.0731217	-0.617154	0.920664	0.961126
V$MYC_Q2	Forskolin	89	-0.0552746	-0.605372	0.957031	0.968129
CCAGGGG,MIR-331	Forskolin	50	-0.0714622	-0.600577	0.949187	0.969171
V$IRF1_01	Forskolin	137	-0.0432225	-0.593189	0.950538	0.972011
GGARNTKYCCA_UNKNOWN	Forskolin	45	-0.0745359	-0.591871	0.957317	0.970525
V$MSX1_01	Forskolin	107	-0.0508921	-0.589905	0.938224	0.969489
CAAGGAT,MIR-362	Forskolin	41	-0.0784303	-0.585906	0.954092	0.969752
GTGTCAA,MIR-514	Forskolin	42	-0.0702351	-0.537278	0.974206	0.992722
GGGACCA,MIR-133A,MIR-133B	Forskolin	105	-0.0425782	-0.526087	0.984032	0.994582
V$AHR_01	Forskolin	32	-0.0760428	-0.518198	0.986513	0.994641
V$HSF1_01	Forskolin	146	-0.0351723	-0.487998	0.992263	0.999638
TACGGGT,MIR-99A,MIR-100,MIR-99B	Forskolin	16	-0.0975199	-0.461479	0.992016	1
V$PAX2_01	Forskolin	22	-0.082607	-0.458378	0.997942	0.99893
ACACTCC,MIR-122A	Forskolin	47	-0.0412494	-0.328965	1	0.999995
