# Supplementary material for: Gene Expression Analysis of Forskolin Treated Basilar Papillae Identifies MicroRNA181a as a Mediator of Proliferation
Source: PLoS One. 2010 Jul 9;5(7):e11502. doi: 10.1371/journal.pone.0011502 (PMC2901389; doi:10.1371/journal.pone.0011502)
Supplement: Table S8 — Gene set enrichment analysis statistics. Mammalian gene sets enriched in the control and forskolin samples after 48 hours. (0.19 MB XLS) [file pone.0011502.s008.xls]

## Sheet: Sheet1
Gene Set Name	Enriched in Control/Forskolin?	Gene Set Size	Enrichment Score	Normalized Enrichment Score	P-Value	False Discovery Rate (Q-Value)
V$NRSF_01	Control	55	0.26114	2.24622	0	0.267285
V$E2A_Q2	Control	124	0.17049	2.21934	0.00408163	0.164166
V$AMEF2_Q6	Control	160	0.150437	2.18584	0.00205339	0.143398
TGCCAAR_V$NF1_Q6	Control	397	0.0947423	2.15319	0.00205761	0.134723
V$STAT5A_04	Control	118	0.15693	2.00877	0.0107066	0.267698
TAATTA_V$CHX10_01	Control	476	0.0812786	2.00683	0.00191571	0.225257
GATAAGR_V$GATA_C	Control	169	0.129997	1.95754	0.00202429	0.261407
V$GATA_Q6	Control	116	0.152492	1.92797	0.0102881	0.271619
V$MMEF2_Q6	Control	172	0.128741	1.91797	0.0020284	0.256076
V$CART1_01	Control	135	0.141074	1.91727	0.00806452	0.231503
V$ERR1_Q2	Control	144	0.130219	1.84398	0.012	0.317463
V$CHX10_01	Control	142	0.131902	1.83034	0.0180723	0.311619
V$MEF2_Q6_01	Control	162	0.124282	1.83008	0.014433	0.287966
TGACCTTG_V$SF1_Q6	Control	142	0.1319	1.82985	0.00792079	0.267742
CGTSACG_V$PAX3_B	Control	84	0.16391	1.81071	0.00788955	0.276881
V$PR_Q2	Control	149	0.129739	1.79018	0.034188	0.287925
V$AP1_Q2	Control	154	0.119608	1.74369	0.0248447	0.348725
TGATTTRY_V$GFI1_01	Control	194	0.105147	1.71034	0.0338645	0.389449
YTAATTAA_V$LHX3_01	Control	107	0.143529	1.71026	0.0258449	0.369026
V$OCT1_03	Control	142	0.121934	1.70047	0.0217391	0.370639
V$OCT1_04	Control	142	0.122312	1.67043	0.0329218	0.404966
V$STAT5B_01	Control	137	0.121186	1.65819	0.0243902	0.411351
V$GATA1_04	Control	143	0.118969	1.64591	0.0374753	0.418903
TTCYNRGAA_V$STAT5B_01	Control	179	0.107008	1.62786	0.0418327	0.437199
V$EVI1_03	Control	37	0.227905	1.62653	0.0358566	0.42265
CAGNWMCNNNGAC_UNKNOWN	Control	47	0.196461	1.60498	0.0511247	0.449514
V$AP4_Q6_01	Control	141	0.115212	1.60147	0.0516899	0.439779
YATTNATC_UNKNOWN	Control	214	0.0947638	1.59896	0.0406504	0.429606
V$GATA1_05	Control	162	0.10933	1.5946	0.0497018	0.42347
V$AREB6_01	Control	143	0.11545	1.57119	0.0469083	0.45569
V$STAT4_01	Control	151	0.109444	1.56714	0.057732	0.449342
V$ER_Q6_02	Control	145	0.112687	1.56178	0.0564202	0.447037
CCANNAGRKGGC_UNKNOWN	Control	59	0.173263	1.53927	0.0481696	0.481818
V$HNF1_01	Control	119	0.122257	1.53668	0.0585859	0.47233
V$ZIC1_01	Control	143	0.10834	1.52099	0.0538793	0.493786
TAAWWATAG_V$RSRFC4_Q2	Control	93	0.133209	1.51968	0.0737052	0.482673
V$TCF11_01	Control	140	0.115013	1.50408	0.0532787	0.50306
CAGGTCC,MIR-492	Control	31	0.233347	1.49889	0.0823529	0.500684
V$FOXM1_01	Control	134	0.111396	1.49292	0.0574257	0.500287
YATGNWAAT_V$OCT_C	Control	212	0.0880326	1.48795	0.0767635	0.498078
CTGYNNCTYTAA_UNKNOWN	Control	48	0.179415	1.47291	0.0907336	0.517399
CTAWWWATA_V$RSRFC4_Q2	Control	213	0.0884635	1.47085	0.0815534	0.509867
V$CEBPB_02	Control	172	0.0954514	1.46922	0.0718336	0.501802
V$GATA_C	Control	154	0.100631	1.4646	0.0761905	0.500216
V$MYC_Q2	Control	94	0.129702	1.46082	0.0752896	0.497117
V$OCT1_Q6	Control	152	0.100482	1.45977	0.0696721	0.488164
CCAGGGG,MIR-331	Control	53	0.164722	1.44308	0.0863724	0.513409
V$AR_01	Control	76	0.137644	1.43791	0.0965251	0.513303
TGANNYRGCA_V$TCF11MAFG_01	Control	163	0.0951356	1.43143	0.0865979	0.516818
V$HNF6_Q6	Control	150	0.0990752	1.42423	0.0791667	0.521805
YTATTTTNR_V$MEF2_02	Control	422	0.0603676	1.4206	0.0931559	0.520054
TGGNNNNNNKCCAR_UNKNOWN	Control	213	0.0831523	1.41284	0.111332	0.52697
YGACNNYACAR_UNKNOWN	Control	48	0.171384	1.41098	0.0934959	0.520992
V$MEIS1BHOXA9_01	Control	83	0.129747	1.40102	0.0925197	0.53301
V$RSRFC4_01	Control	152	0.0985712	1.39996	0.0905512	0.525393
V$HNF1_Q6	Control	134	0.103438	1.39548	0.107547	0.525389
V$NF1_Q6_01	Control	153	0.096207	1.39232	0.115152	0.522664
GGGYGTGNY_UNKNOWN	Control	335	0.0659105	1.38913	0.119588	0.520271
V$HMEF2_Q6	Control	91	0.122765	1.3669	0.126984	0.560846
RAAGNYNNCTTY_UNKNOWN	Control	83	0.128467	1.36237	0.118774	0.561885
V$OCT1_05	Control	150	0.0938595	1.34945	0.125498	0.581075
V$EVI1_05	Control	117	0.106812	1.33722	0.136802	0.600347
V$SF1_Q6	Control	128	0.101785	1.33437	0.152577	0.597135
V$NFE2_01	Control	145	0.0955329	1.33211	0.137131	0.59348
V$ATF1_Q6	Control	140	0.0961019	1.32758	0.150198	0.595199
V$MYOD_Q6	Control	132	0.0993305	1.32635	0.143763	0.588873
V$NKX25_01	Control	73	0.132127	1.32451	0.165669	0.584199
V$HEB_Q6	Control	125	0.100332	1.31953	0.160321	0.586976
V$TATA_C	Control	177	0.0835888	1.31723	0.14053	0.583529
V$CREB_Q4_01	Control	121	0.102343	1.30632	0.162978	0.599928
V$IPF1_Q4	Control	144	0.092735	1.29899	0.156313	0.608214
TGACATY_UNKNOWN	Control	393	0.0562291	1.2869	0.176113	0.628074
V$STAT5A_01	Control	138	0.0932363	1.28617	0.1875	0.62132
V$PAX3_B	Control	50	0.151093	1.28561	0.162978	0.614048
GGGGCCC,MIR-296	Control	25	0.221178	1.28468	0.171488	0.608179
V$CREB_Q2_01	Control	132	0.0940809	1.28446	0.171548	0.600675
V$LHX3_01	Control	146	0.0920283	1.2785	0.168651	0.60669
V$NKX3A_01	Control	125	0.0979436	1.27246	0.1875	0.612749
GTGGGTGK_UNKNOWN	Control	158	0.0865458	1.26696	0.161165	0.618105
V$MEF2_02	Control	148	0.0877821	1.26681	0.206061	0.610646
V$HNF3_Q6	Control	130	0.0938415	1.26198	0.189824	0.613994
YCATTAA_UNKNOWN	Control	331	0.0592869	1.25811	0.177291	0.615551
V$MEF2_01	Control	100	0.106731	1.25026	0.190476	0.626265
V$S8_01	Control	149	0.0884118	1.24696	0.196393	0.62633
V$VDR_Q6	Control	134	0.0915718	1.24484	0.192607	0.62369
GCACCTT,MIR-18A,MIR-18B	Control	73	0.121328	1.23745	0.202105	0.633191
V$TAL1ALPHAE47_01	Control	142	0.0888513	1.23637	0.20122	0.628496
CTCAGGG,MIR-125B,MIR-125A	Control	206	0.0744071	1.2353	0.194726	0.623471
V$AP1_Q4_01	Control	147	0.0858016	1.23367	0.199153	0.619974
CTGCAGY_UNKNOWN	Control	417	0.0523106	1.23162	0.208897	0.617486
V$AP1_C	Control	159	0.0844144	1.22839	0.217742	0.61791
V$FREAC3_01	Control	143	0.0884794	1.22702	0.204868	0.614316
V$CDP_02	Control	71	0.123425	1.21528	0.207739	0.6341
V$CEBPGAMMA_Q6	Control	148	0.0861294	1.21365	0.202	0.630875
TGAYRTCA_V$ATF3_Q6	Control	297	0.0596411	1.21031	0.218437	0.631487
V$GATA3_01	Control	131	0.0917461	1.20892	0.227848	0.627948
V$HNF3B_01	Control	134	0.0898154	1.20298	0.205179	0.634642
CCTNTMAGA_UNKNOWN	Control	67	0.123058	1.20036	0.238095	0.634213
AAAYWAACM_V$HFH4_01	Control	158	0.0829725	1.19794	0.237452	0.633218
V$AP4_Q6	Control	120	0.09335	1.19306	0.244048	0.638124
RYTGCNWTGGNR_UNKNOWN	Control	53	0.140871	1.18998	0.266393	0.638608
V$FREAC4_01	Control	88	0.110835	1.18525	0.260274	0.642851
V$AP1_Q4	Control	152	0.0800281	1.18246	0.227006	0.642922
V$AP1_01	Control	142	0.0831654	1.17797	0.230769	0.647001
GTGTCAA,MIR-514	Control	44	0.151084	1.17425	0.239464	0.649231
V$CEBPDELTA_Q6	Control	144	0.0845242	1.17252	0.254206	0.647108
V$CREBP1_Q2	Control	136	0.0852097	1.17017	0.268595	0.646055
V$ZIC2_01	Control	138	0.0840079	1.16962	0.280412	0.641168
ACTACCT,MIR-196A,MIR-196B	Control	91	0.104528	1.16873	0.238095	0.637231
V$EVI1_04	Control	150	0.0794477	1.16461	0.248497	0.640447
V$GRE_C	Control	72	0.117877	1.1634	0.285714	0.637101
TCCAGAG,MIR-518C	Control	88	0.104811	1.16267	0.259635	0.633025
V$BRN2_01	Control	156	0.0794665	1.1616	0.253247	0.629848
YNTTTNNNANGCARM_UNKNOWN	Control	46	0.144799	1.16029	0.265873	0.627461
TTGCWCAAY_V$CEBPB_02	Control	41	0.154564	1.15927	0.266019	0.624012
V$ATF3_Q6	Control	143	0.0839029	1.15771	0.276	0.622078
YTAAYNGCT_UNKNOWN	Control	87	0.107422	1.15049	0.281513	0.632277
V$PAX_Q6	Control	143	0.0821789	1.14812	0.270428	0.632004
V$FOX_Q2	Control	136	0.0827239	1.14742	0.282744	0.628299
V$AP1_Q6_01	Control	135	0.0837838	1.12902	0.294821	0.662115
V$GATA6_01	Control	161	0.0747392	1.12348	0.320463	0.669209
V$COREBINDINGFACTOR_Q6	Control	142	0.080022	1.11959	0.290837	0.672384
GAGCTGG,MIR-337	Control	92	0.0985141	1.11765	0.306773	0.671369
V$NKX62_Q2	Control	134	0.0829151	1.11729	0.307536	0.666746
V$AP4_Q5	Control	150	0.079339	1.11614	0.311787	0.663969
V$CDPCR3_01	Control	30	0.173859	1.11528	0.319502	0.660594
V$STAT6_02	Control	138	0.0802596	1.11195	0.281553	0.662586
RRAGTTGT_UNKNOWN	Control	143	0.0798258	1.11158	0.331461	0.658269
V$ARP1_01	Control	90	0.100195	1.1074	0.314516	0.661926
V$ATF4_Q2	Control	141	0.0786861	1.10266	0.302505	0.666867
GGATTA_V$PITX2_Q2	Control	337	0.0533325	1.09836	0.323471	0.670987
V$HNF1_C	Control	126	0.0826934	1.09506	0.329435	0.672797
V$HFH3_01	Control	120	0.0854868	1.08531	0.348178	0.688637
V$RSRFC4_Q2	Control	136	0.0808707	1.08252	0.345833	0.689263
WTGAAAT_UNKNOWN	Control	356	0.0494265	1.08211	0.320866	0.685045
V$OCT1_Q5_01	Control	155	0.0756993	1.07923	0.340122	0.686411
V$ATF_B	Control	106	0.0896693	1.07655	0.352362	0.68698
AGCYRWTTC_UNKNOWN	Control	62	0.11569	1.07495	0.344689	0.685528
V$CDX2_Q5	Control	156	0.0723451	1.07441	0.360624	0.681787
V$ZF5_B	Control	138	0.0779297	1.07306	0.361169	0.679545
GCTNWTTGK_UNKNOWN	Control	178	0.0702588	1.07228	0.341053	0.676242
V$HAND1E47_01	Control	158	0.0734662	1.07204	0.350097	0.671909
V$FREAC7_01	Control	108	0.0887106	1.07157	0.346979	0.668164
V$STAT5A_03	Control	153	0.0738258	1.0693	0.372141	0.668103
V$OCT_C	Control	150	0.0745539	1.06464	0.37422	0.673106
AAANWWTGC_UNKNOWN	Control	126	0.080764	1.06184	0.377871	0.674285
V$POU3F2_02	Control	149	0.0733926	1.0567	0.366397	0.680621
V$NCX_01	Control	106	0.0856506	1.05519	0.359841	0.678924
V$IK2_01	Control	155	0.0731799	1.05504	0.384321	0.674674
V$POU3F2_01	Control	60	0.115504	1.05471	0.358779	0.670849
V$FOXJ2_01	Control	115	0.0838867	1.05461	0.365571	0.666546
V$OCT1_B	Control	149	0.0710812	1.047	0.360947	0.677353
V$COMP1_01	Control	75	0.103302	1.04517	0.389328	0.676698
V$PIT1_Q6	Control	139	0.0763243	1.0446	0.386318	0.673525
V$HP1SITEFACTOR_Q6	Control	140	0.0763976	1.04014	0.394584	0.678094
V$DBP_Q6	Control	142	0.0742923	1.03461	0.360687	0.685357
V$GFI1_01	Control	147	0.0720941	1.02962	0.401222	0.691288
V$PBX1_01	Control	141	0.0731057	1.02812	0.4	0.689912
V$BACH1_01	Control	138	0.0755431	1.0194	0.402083	0.703408
V$TATA_01	Control	145	0.0719471	1.01755	0.401923	0.702871
V$SRF_C	Control	120	0.0786342	1.01701	0.423529	0.699635
CTGRYYYNATT_UNKNOWN	Control	44	0.131082	1.0162	0.384615	0.697029
TGACGTCA_V$ATF3_Q6	Control	130	0.0762906	1.0095	0.443763	0.706511
V$FOXO4_02	Control	153	0.069904	1.00866	0.428571	0.703961
V$SRF_Q6	Control	138	0.0738428	1.00587	0.44668	0.705503
V$SREBP1_02	Control	48	0.123269	1.00399	0.439331	0.705223
TGASTMAGC_V$NFE2_01	Control	108	0.0811033	0.998637	0.424116	0.711656
CAGCAGG,MIR-370	Control	94	0.0911931	0.996571	0.470588	0.711691
V$SRF_Q5_01	Control	127	0.07557	0.995666	0.440644	0.709348
V$TBP_01	Control	120	0.0781858	0.991253	0.449692	0.71414
V$MEF2_03	Control	151	0.0690703	0.989072	0.418838	0.714492
V$GATA1_03	Control	143	0.0707583	0.985399	0.452083	0.71777
V$TAL1BETAITF2_01	Control	139	0.072339	0.976353	0.449505	0.731556
TACGGGT,MIR-99A,MIR-100,MIR-99B	Control	16	0.201125	0.972089	0.450199	0.736017
V$OCT1_07	Control	94	0.0861884	0.969522	0.477318	0.737075
V$STAT6_01	Control	154	0.0677932	0.969356	0.469903	0.733252
V$HMGIY_Q6	Control	123	0.0764647	0.967332	0.484496	0.73306
V$RFX1_02	Control	129	0.072743	0.965043	0.474227	0.733492
V$SRF_Q4	Control	129	0.0714134	0.963257	0.486486	0.733016
V$PXR_Q2	Control	155	0.067502	0.957869	0.486974	0.739806
V$FXR_IR1_Q6	Control	61	0.104254	0.956555	0.485294	0.738384
V$GNCF_01	Control	46	0.118324	0.955181	0.522417	0.737051
V$OCT1_02	Control	137	0.0696094	0.948516	0.469008	0.745962
V$HOXA4_Q2	Control	152	0.0662316	0.94461	0.524008	0.750012
ATACCTC,MIR-202	Control	128	0.0716298	0.939378	0.524851	0.756451
TGTYNNNNNRGCARM_UNKNOWN	Control	40	0.125194	0.938718	0.507782	0.753612
V$XBP1_01	Control	72	0.0958198	0.937275	0.511858	0.752577
V$HSF1_01	Control	155	0.0641171	0.927808	0.551657	0.767559
V$GATA1_02	Control	148	0.0660071	0.925268	0.571429	0.768611
V$HNF4_Q6	Control	133	0.0687191	0.923461	0.507187	0.768376
GTTATAT,MIR-410	Control	79	0.0879596	0.923239	0.518095	0.764775
V$HNF3ALPHA_Q6	Control	136	0.0663272	0.911536	0.559761	0.78442
YAATNANRNNNCAG_UNKNOWN	Control	41	0.119129	0.910301	0.551308	0.782725
V$ER_Q6_01	Control	157	0.0627908	0.908546	0.55625	0.782108
V$TAL1BETAE47_01	Control	138	0.0663541	0.906269	0.563745	0.782535
V$TCF1P_Q6	Control	139	0.0663295	0.904351	0.569767	0.782279
V$CEBPA_01	Control	150	0.0626412	0.896696	0.580376	0.792886
V$AP1FJ_Q2	Control	149	0.0627831	0.892704	0.559356	0.796681
V$HOX13_01	Control	26	0.147387	0.886999	0.570312	0.80345
V$E47_02	Control	136	0.0642796	0.870746	0.581781	0.83082
GTAAGAT,MIR-200A	Control	37	0.122867	0.869575	0.649299	0.828859
GACAGGG,MIR-339	Control	40	0.117768	0.867598	0.60521	0.82855
CAGNYGKNAAA_UNKNOWN	Control	40	0.117637	0.865517	0.610672	0.828465
V$MYOD_Q6_01	Control	127	0.0649173	0.865105	0.626204	0.825175
TGTTTGY_V$HNF3_Q6	Control	428	0.0368839	0.861237	0.616896	0.828589
V$P53_02	Control	141	0.060914	0.85889	0.623274	0.829038
V$AP1_Q6	Control	135	0.0632397	0.857165	0.654618	0.828355
RTTTNNNYTGGM_UNKNOWN	Control	97	0.0742171	0.855898	0.658333	0.826742
YKACATTT_UNKNOWN	Control	157	0.0585373	0.851012	0.641283	0.831803
TGCAAAC,MIR-452	Control	72	0.0865015	0.85071	0.636917	0.828516
V$GR_Q6	Control	150	0.0595129	0.847639	0.658203	0.830308
WCAANNNYCAG_UNKNOWN	Control	127	0.0645931	0.835765	0.650284	0.847713
GGCKCATGS_UNKNOWN	Control	37	0.115921	0.835477	0.657143	0.844293
V$AR_Q6	Control	134	0.0611915	0.832542	0.672131	0.845581
V$PPARG_01	Control	26	0.134434	0.824321	0.695312	0.856636
V$MYOGENIN_Q6	Control	128	0.0615265	0.81738	0.678208	0.86522
RYCACNNRNNRNCAG_UNKNOWN	Control	32	0.1235	0.817301	0.686475	0.861374
V$AREB6_03	Control	132	0.0605287	0.809009	0.726531	0.872315
V$NFKB_C	Control	141	0.056864	0.806863	0.711693	0.872146
V$POU1F1_Q6	Control	141	0.0581724	0.804653	0.720081	0.872069
GGAMTNNNNNTCCY_UNKNOWN	Control	57	0.0917207	0.803637	0.686747	0.869882
V$AP1_Q2_01	Control	147	0.0570053	0.800052	0.69574	0.872238
V$HNF4_DR1_Q3	Control	135	0.0592866	0.793919	0.716981	0.879038
GCANCTGNY_V$MYOD_Q6	Control	471	0.0325146	0.788155	0.728346	0.885006
V$MSX1_01	Control	117	0.0616849	0.787435	0.728713	0.882253
V$MYOGNF1_01	Control	27	0.124242	0.773528	0.765166	0.901709
V$SREBP1_Q6	Control	135	0.0568555	0.76947	0.750529	0.904487
CTCCAAG,MIR-432	Control	48	0.0928349	0.76345	0.762712	0.910254
V$OCT_Q6	Control	151	0.051048	0.754513	0.774257	0.920841
TTTNNANAGCYR_UNKNOWN	Control	56	0.0846154	0.751722	0.760593	0.921314
RYAAAKNNNNNNTTGW_UNKNOWN	Control	52	0.0893183	0.750885	0.755511	0.918657
V$ZIC3_01	Control	147	0.0542414	0.750447	0.783567	0.915438
V$E47_01	Control	152	0.0514408	0.736524	0.806841	0.933223
V$LFA1_Q6	Control	123	0.0571487	0.726144	0.82549	0.94449
V$MEF2_04	Control	15	0.153747	0.726072	0.804554	0.940592
V$PAX4_04	Control	127	0.0558052	0.718267	0.817444	0.947853
RGAANNTTC_V$HSF1_01	Control	255	0.0380437	0.716801	0.827723	0.946029
V$MEIS1AHOXA9_01	Control	67	0.0737451	0.704307	0.84413	0.959578
V$MTF1_Q4	Control	139	0.0517936	0.70161	0.8389	0.959379
V$FOXO1_02	Control	144	0.0499529	0.696566	0.841085	0.962006
V$OCT1_01	Control	146	0.0500266	0.695591	0.846591	0.959335
V$AP3_Q6	Control	151	0.0491567	0.689529	0.863894	0.96332
TNCATNTCCYR_UNKNOWN	Control	64	0.0727272	0.687897	0.879668	0.961335
V$NKX25_02	Control	164	0.0459483	0.685566	0.86722	0.960439
V$CP2_02	Control	120	0.0535547	0.674277	0.881633	0.970092
GTTRYCATRR_UNKNOWN	Control	89	0.0611264	0.673088	0.89144	0.967561
V$AP2ALPHA_01	Control	116	0.0521131	0.660498	0.888247	0.978349
YWATTWNNRGCT_UNKNOWN	Control	41	0.0870882	0.658606	0.89881	0.976457
V$CRX_Q4	Control	142	0.0473119	0.657689	0.897436	0.973638
GTCAACC,MIR-380-5P	Control	17	0.130881	0.656301	0.90239	0.971329
WGGAATGY_V$TEF1_Q6	Control	208	0.0395404	0.64539	0.891304	0.978882
SYATTGTG_UNKNOWN	Control	119	0.0505107	0.645078	0.90101	0.975303
CCAWWNAAGG_V$SRF_Q4	Control	44	0.0829824	0.637071	0.90873	0.979379
V$RP58_01	Control	132	0.0481723	0.634993	0.914343	0.977531
V$ETS1_B	Control	128	0.0481448	0.634804	0.927165	0.973866
V$COUP_DR1_Q6	Control	123	0.0472737	0.621669	0.938224	0.98219
V$MIF1_01	Control	103	0.0525516	0.620965	0.91502	0.978933
V$CEBP_Q2_01	Control	163	0.0418281	0.618475	0.933202	0.977263
V$MYOD_01	Control	149	0.0429203	0.609787	0.931864	0.98057
V$COUP_01	Control	136	0.0434053	0.605338	0.935743	0.980247
ACATATC,MIR-190	Control	48	0.0751178	0.601453	0.937378	0.979388
V$TCF4_Q5	Control	138	0.0433476	0.600609	0.945565	0.976276
V$AP2GAMMA_01	Control	121	0.0465902	0.596557	0.959847	0.975453
V$FREAC2_01	Control	147	0.0419698	0.585771	0.961905	0.979265
RGAGGAARY_V$PU1_Q6	Control	260	0.0319846	0.583772	0.969072	0.976815
RNCTGNYNRNCTGNY_UNKNOWN	Control	34	0.0832886	0.580079	0.955882	0.975462
TCCAGAT,MIR-516-5P	Control	72	0.0547658	0.545426	0.973631	0.990023
AAAYRNCTG_UNKNOWN	Control	225	0.0308556	0.537889	0.982	0.989442
V$ZID_01	Control	131	0.0393575	0.529002	0.96822	0.98915
V$E12_Q6	Control	131	0.039621	0.518681	0.990215	0.988629
ARGGGTTAA_UNKNOWN	Control	66	0.0541649	0.512786	0.98994	0.986734
RCGCANGCGY_V$NRF1_Q6	Forskolin	450	-0.179932	-4.30777	0	0
GCCATNTTG_V$YY1_Q6	Forskolin	236	-0.188468	-3.37846	0	0
V$E2F_Q4_01	Forskolin	128	-0.233115	-3.04146	0	0.000441
V$E2F1DP1RB_01	Forskolin	114	-0.235545	-3.03292	0	0.000331
ACTAYRNNNCCCR_UNKNOWN	Forskolin	209	-0.17783	-3.03001	0	0.000265
GCACTTT,MIR-17-5P,MIR-20A,MIR-106A,MIR-106B,MIR-20B,MIR-519D	Forskolin	391	-0.127098	-2.96429	0	0.00044
MGGAAGTG_V$GABP_B	Forskolin	382	-0.135672	-2.96249	0	0.000378
ACACTGG,MIR-199A,MIR-199B	Forskolin	106	-0.236952	-2.91769	0	0.000493
TGCCTTA,MIR-124A	Forskolin	397	-0.122612	-2.86512	0	0.000591
V$E2F1_Q4_01	Forskolin	127	-0.210107	-2.80544	0	0.000929
ACATTCC,MIR-1,MIR-206	Forskolin	208	-0.167144	-2.8051	0	0.000844
AACTGAC,MIR-223	Forskolin	72	-0.274423	-2.80138	0	0.000892
AGCACTT,MIR-93,MIR-302A,MIR-302B,MIR-302C,MIR-302D,MIR-372,MIR-373,MIR-520E,MIR-520A,MIR-526B,MIR-520B,MIR-520C,MIR-520D	Forskolin	214	-0.162689	-2.79136	0	0.000823
V$E2F_02	Forskolin	118	-0.214321	-2.73298	0	0.00104698
ATCATGA,MIR-433	Forskolin	88	-0.246878	-2.73004	0	0.00106653
V$E2F_Q3_01	Forskolin	129	-0.201759	-2.69412	0	0.00116676
KCCGNSWTTT_UNKNOWN	Forskolin	65	-0.27976	-2.68407	0	0.00132328
CTTTGTA,MIR-524	Forskolin	310	-0.132325	-2.68281	0	0.00124977
ATGTACA,MIR-493	Forskolin	229	-0.152737	-2.67197	0	0.00118399
V$E2F_Q6	Forskolin	123	-0.20319	-2.66509	0	0.00112479
ACCATTT,MIR-522	Forskolin	119	-0.209655	-2.6599	0	0.0011328
CAGTATT,MIR-200B,MIR-200C,MIR-429	Forskolin	340	-0.12506	-2.65086	0	0.00120497
TTTGCAG,MIR-518A-2	Forskolin	141	-0.186794	-2.61957	0	0.00167815
V$E2F_Q4	Forskolin	127	-0.198016	-2.6151	0	0.00182752
TGAATGT,MIR-181A,MIR-181B,MIR-181C,MIR-181D	Forskolin	345	-0.123254	-2.60402	0	0.0018079
CATTTCA,MIR-203	Forskolin	196	-0.158463	-2.60157	0	0.00173836
V$USF_01	Forskolin	148	-0.183536	-2.58098	0	0.00177085
V$ELK1_02	Forskolin	130	-0.196429	-2.57882	0	0.00170761
V$E2F1DP1_01	Forskolin	118	-0.205774	-2.56887	0	0.00178619
V$E2F1DP2_01	Forskolin	118	-0.205774	-2.56182	0	0.0018129
V$E2F4DP2_01	Forskolin	118	-0.205774	-2.54466	0	0.00179732
TGCGCANK_UNKNOWN	Forskolin	271	-0.133094	-2.5318	0	0.00186278
AAAGACA,MIR-511	Forskolin	134	-0.1897	-2.52625	0	0.00204695
V$E2F_Q3	Forskolin	114	-0.202717	-2.49646	0	0.00240113
V$AP2_Q6	Forskolin	141	-0.179976	-2.49186	0	0.00237042
V$E2F4DP1_01	Forskolin	117	-0.199698	-2.47718	0	0.00284853
TTTTGAG,MIR-373	Forskolin	156	-0.170623	-2.46522	0	0.00312134
GGCNKCCATNK_UNKNOWN	Forskolin	69	-0.251455	-2.46391	0	0.00307331
V$ARNT_02	Forskolin	130	-0.183972	-2.45929	0	0.00306024
GTAAACC,MIR-299-5P	Forskolin	28	-0.393388	-2.45041	0	0.0031079
V$E2F1_Q6	Forskolin	121	-0.186846	-2.44029	0	0.00340844
ACTTTAT,MIR-142-5P	Forskolin	213	-0.141247	-2.39542	0	0.00467849
V$E2F_03	Forskolin	127	-0.187972	-2.38224	0	0.00502586
TAGCTTT,MIR-9	Forskolin	172	-0.15528	-2.36977	0.002	0.00545474
V$E2F1_Q4	Forskolin	141	-0.171427	-2.36009	0.00204499	0.00582026
TTGCCAA,MIR-182	Forskolin	219	-0.137902	-2.35242	0	0.00600859
V$TEL2_Q6	Forskolin	95	-0.206256	-2.33122	0.00211416	0.00701642
V$E2F_Q6_01	Forskolin	123	-0.179352	-2.32471	0	0.0071169
V$NFMUE1_Q6	Forskolin	139	-0.173667	-2.32345	0	0.00702491
ACTGCAG,MIR-17-3P	Forskolin	76	-0.227935	-2.32011	0	0.00701883
V$ARNT_01	Forskolin	148	-0.165196	-2.31152	0	0.00718315
TTTGTAG,MIR-520D	Forskolin	238	-0.127922	-2.28865	0.00199203	0.00833054
TGTGTGA,MIR-377	Forskolin	128	-0.174726	-2.28471	0	0.00842035
GCAAAAA,MIR-129	Forskolin	123	-0.175984	-2.26604	0.00208768	0.00928256
TGCTGCT,MIR-15A,MIR-16,MIR-15B,MIR-195,MIR-424,MIR-497	Forskolin	392	-0.101114	-2.25724	0	0.0096169
V$E2F1_Q3	Forskolin	121	-0.172617	-2.20606	0.00206186	0.0134655
CACGTTT,MIR-302A	Forskolin	18	-0.43614	-2.20347	0.00198807	0.0133232
TGCTTTG,MIR-330	Forskolin	230	-0.128677	-2.19105	0.00200803	0.014175
ATGTTAA,MIR-302C	Forskolin	177	-0.139512	-2.1778	0.0019685	0.01512
V$E2F1_Q6_01	Forskolin	127	-0.163112	-2.1725	0.00787402	0.0153277
SGCGSSAAA_V$E2F1DP2_01	Forskolin	84	-0.199189	-2.17157	0.00617284	0.0151395
V$NRF2_01	Forskolin	114	-0.176348	-2.16789	0.00402414	0.015461
ACACTAC,MIR-142-3P	Forskolin	86	-0.196734	-2.16249	0.00205761	0.0157901
TCCCRNNRTGC_UNKNOWN	Forskolin	100	-0.18233	-2.13582	0.00196078	0.0182836
GTGCCAT,MIR-183	Forskolin	133	-0.158086	-2.12953	0.00408998	0.0185612
GTGCCTT,MIR-506	Forskolin	468	-0.0851899	-2.1253	0.00206186	0.0189748
GACTGTT,MIR-212,MIR-132	Forskolin	111	-0.173001	-2.11489	0.00199203	0.0201512
GTGACGY_V$E4F1_Q6	Forskolin	342	-0.100099	-2.11304	0.0040568	0.020165
V$SREBP1_01	Forskolin	99	-0.181943	-2.10369	0.00204499	0.0211069
TGTTTAC,MIR-30A-5P,MIR-30C,MIR-30D,MIR-30B,MIR-30E-5P	Forskolin	426	-0.0888925	-2.10223	0.00203252	0.0210147
TCANNTGAY_V$SREBP1_01	Forskolin	258	-0.114227	-2.10075	0.00413223	0.0208472
TTGGAGA,MIR-515-5P,MIR-519E	Forskolin	97	-0.182007	-2.09558	0	0.0211777
ATACTGT,MIR-144	Forskolin	153	-0.144348	-2.08517	0	0.0223358
AAAGGGA,MIR-204,MIR-211	Forskolin	158	-0.137419	-2.06633	0.00198413	0.025019
TGCACTT,MIR-519C,MIR-519B,MIR-519A	Forskolin	300	-0.103197	-2.05915	0	0.0256261
GCATTTG,MIR-105	Forskolin	129	-0.157969	-2.05884	0.00379507	0.025324
CACTGTG,MIR-128A,MIR-128B	Forskolin	216	-0.120125	-2.04365	0	0.0269299
ACTGAAA,MIR-30A-3P,MIR-30E-3P	Forskolin	135	-0.147175	-2.03751	0	0.027458
V$GABP_B	Forskolin	110	-0.161126	-2.03272	0.00389864	0.0280477
TCTGATC,MIR-383	Forskolin	33	-0.292884	-2.03223	0.0117878	0.027746
ACACTCC,MIR-122A	Forskolin	48	-0.246839	-2.02194	0.00408163	0.0288086
V$SOX9_B1	Forskolin	153	-0.139099	-2.01878	0.00609756	0.0290471
ACCAAAG,MIR-9	Forskolin	357	-0.0930151	-2.01227	0.00798403	0.0295326
V$NFY_C	Forskolin	127	-0.156542	-2.0115	0.0059761	0.0292729
GAGACTG,MIR-452	Forskolin	66	-0.21054	-2.00291	0	0.030356
CAGCTTT,MIR-320	Forskolin	169	-0.133923	-1.98795	0.00588235	0.0326839
CACTTTG,MIR-520G,MIR-520H	Forskolin	151	-0.138976	-1.97683	0.00647948	0.0344831
V$GCM_Q2	Forskolin	130	-0.146488	-1.96844	0.00195312	0.0355996
GTTAAAG,MIR-302B	Forskolin	54	-0.225993	-1.96735	0.01	0.0354605
V$EGR1_01	Forskolin	133	-0.144482	-1.96382	0.0119284	0.0357529
V$YY1_Q6	Forskolin	127	-0.148503	-1.96368	0.0176471	0.035374
TCTCTCC,MIR-185	Forskolin	63	-0.205804	-1.9594	0.00845666	0.0360126
AGTCAGC,MIR-345	Forskolin	40	-0.261108	-1.95564	0.00195695	0.0364207
GGCNRNWCTTYS_UNKNOWN	Forskolin	41	-0.256706	-1.95207	0.0083682	0.0368187
TAANNYSGCG_UNKNOWN	Forskolin	41	-0.258974	-1.95068	0.00404858	0.0367479
ACAWNRNSRCGG_UNKNOWN	Forskolin	40	-0.258469	-1.9497	0.0123203	0.0366085
GGTGAAG,MIR-412	Forskolin	42	-0.254487	-1.94724	0.00407332	0.0367847
AAAGGAT,MIR-501	Forskolin	89	-0.173933	-1.94392	0.00963391	0.037199
GTACTGT,MIR-101	Forskolin	194	-0.120226	-1.9355	0.0059761	0.0385439
CAGTGTT,MIR-141,MIR-200A	Forskolin	223	-0.110699	-1.93278	0.0083682	0.0388298
TTCYRGAA_UNKNOWN	Forskolin	177	-0.122818	-1.92969	0.00594059	0.0390425
CCAGGTT,MIR-490	Forskolin	37	-0.265123	-1.9203	0.00210526	0.0408594
TTTGCAC,MIR-19A,MIR-19B	Forskolin	362	-0.0859389	-1.89057	0.0135922	0.0475949
V$NRF1_Q6	Forskolin	115	-0.147631	-1.88927	0.0119048	0.0475539
GGCAGCT,MIR-22	Forskolin	160	-0.122107	-1.86282	0.0102041	0.05453
V$YY1_02	Forskolin	134	-0.13929	-1.86244	0.00984252	0.0541367
TGCACTG,MIR-148A,MIR-152,MIR-148B	Forskolin	206	-0.110321	-1.86075	0.0145833	0.0540489
V$NFY_Q6_01	Forskolin	133	-0.138171	-1.85931	0.00838574	0.0540361
AACTGGA,MIR-145	Forskolin	163	-0.127855	-1.85783	0.00998004	0.0539728
V$NFY_01	Forskolin	141	-0.134553	-1.85422	0.0229645	0.0545046
GTTTGTT,MIR-495	Forskolin	161	-0.125291	-1.8481	0.00785855	0.0557299
V$ETS_Q4	Forskolin	109	-0.152126	-1.84547	0.01417	0.055961
TAATGTG,MIR-323	Forskolin	123	-0.138614	-1.84292	0.00984252	0.0562461
V$E2F_Q2	Forskolin	101	-0.1584	-1.84285	0.01222	0.0557753
ATAGGAA,MIR-202	Forskolin	77	-0.178905	-1.84052	0.0122699	0.0560117
V$MYCMAX_03	Forskolin	146	-0.127387	-1.82851	0.00817996	0.0591944
V$PTF1BETA_Q6	Forskolin	132	-0.137305	-1.82596	0.0102459	0.0593352
GTCTTCC,MIR-7	Forskolin	101	-0.156283	-1.82446	0.0083682	0.059451
AACYNNNNTTCCS_UNKNOWN	Forskolin	48	-0.221752	-1.82431	0.0178571	0.0589736
CGGAARNGGCNG_UNKNOWN	Forskolin	25	-0.302439	-1.81299	0.0218688	0.0624149
AAGGGAT,MIR-188	Forskolin	53	-0.209171	-1.80966	0.0229446	0.0630115
CCGNMNNTNACG_UNKNOWN	Forskolin	43	-0.227696	-1.79575	0.0113422	0.0672101
TMTCGCGANR_UNKNOWN	Forskolin	81	-0.169068	-1.79066	0.0040404	0.068427
ATGTTTC,MIR-494	Forskolin	110	-0.144218	-1.78086	0.0142566	0.0714709
V$LMO2COM_01	Forskolin	127	-0.13354	-1.77458	0.0115385	0.0733767
V$E2F1_Q3_01	Forskolin	132	-0.128719	-1.77213	0.0160321	0.0737935
V$USF_02	Forskolin	154	-0.124564	-1.76781	0.00840336	0.0748367
CAGCACT,MIR-512-3P	Forskolin	88	-0.162385	-1.76545	0.0172084	0.0752967
MCAATNNNNNGCG_UNKNOWN	Forskolin	49	-0.205484	-1.75063	0.0184049	0.0810659
GTATTAT,MIR-369-3P	Forskolin	145	-0.128322	-1.74681	0.0213675	0.0818849
V$USF2_Q6	Forskolin	131	-0.130575	-1.73307	0.0243408	0.0872305
TAATAAT,MIR-126	Forskolin	146	-0.125003	-1.73162	0.0228216	0.0872536
V$CETS1P54_01	Forskolin	110	-0.142373	-1.73045	0.0236686	0.0871379
V$ETF_Q6	Forskolin	64	-0.182893	-1.72638	0.021097	0.088199
ATTCTTT,MIR-186	Forskolin	183	-0.108874	-1.71899	0.0301205	0.0910235
V$SP1_Q6_01	Forskolin	104	-0.141666	-1.71078	0.0246407	0.0942266
GCGNNANTTCC_UNKNOWN	Forskolin	65	-0.181958	-1.699	0.0223577	0.0995759
TCTGATA,MIR-361	Forskolin	64	-0.179354	-1.69312	0.0273973	0.101667
CTATGCA,MIR-153	Forskolin	153	-0.116288	-1.68848	0.0265152	0.103236
GTATGAT,MIR-154,MIR-487	Forskolin	48	-0.206071	-1.68471	0.0287908	0.104566
V$STAT1_01	Forskolin	38	-0.22911	-1.6763	0.0357853	0.108145
YYCATTCAWW_UNKNOWN	Forskolin	119	-0.131336	-1.67382	0.0306122	0.108868
GTGACTT,MIR-224	Forskolin	110	-0.137368	-1.66947	0.0323232	0.110383
V$ZF5_01	Forskolin	133	-0.123828	-1.66897	0.0230608	0.109944
V$PAX4_03	Forskolin	136	-0.124547	-1.66114	0.0301205	0.113404
V$IRF2_01	Forskolin	68	-0.169357	-1.65642	0.0318725	0.115227
CTACTGT,MIR-199A	Forskolin	129	-0.124061	-1.65463	0.0342857	0.115537
WCTCNATGGY_UNKNOWN	Forskolin	43	-0.215066	-1.65301	0.0325671	0.115507
AGGCACT,MIR-515-3P	Forskolin	58	-0.180663	-1.64989	0.0419048	0.116458
ATGAAGG,MIR-205	Forskolin	107	-0.135351	-1.641	0.0327553	0.120888
TTGCACT,MIR-130A,MIR-301,MIR-130B	Forskolin	286	-0.083879	-1.63096	0.0357853	0.126162
TGGTGCT,MIR-29A,MIR-29B,MIR-29C	Forskolin	335	-0.0796422	-1.62767	0.0399202	0.127457
CCAWYNNGAAR_UNKNOWN	Forskolin	83	-0.14911	-1.61626	0.0438095	0.133964
V$MZF1_02	Forskolin	130	-0.120547	-1.61568	0.0285132	0.133357
V$TTF1_Q6	Forskolin	149	-0.112183	-1.61245	0.0313725	0.13441
TACTTGA,MIR-26A,MIR-26B	Forskolin	239	-0.0902531	-1.60696	0.0455487	0.136969
GGCNNMSMYNTTG_UNKNOWN	Forskolin	46	-0.197304	-1.60613	0.0456349	0.136563
V$GATA1_01	Forskolin	136	-0.116178	-1.60349	0.0456432	0.137189
AACATTC,MIR-409-3P	Forskolin	105	-0.133152	-1.59631	0.0688336	0.141231
V$RREB1_01	Forskolin	99	-0.138119	-1.59418	0.0360531	0.141692
AAGCAAT,MIR-137	Forskolin	147	-0.113523	-1.59365	0.0283976	0.141078
KTGGYRSGAA_UNKNOWN	Forskolin	42	-0.201598	-1.59125	0.0578158	0.141958
ATGCAGT,MIR-217	Forskolin	75	-0.153581	-1.58324	0.0512821	0.146375
CATGTAA,MIR-496	Forskolin	122	-0.125213	-1.58183	0.0454545	0.146506
V$EFC_Q6	Forskolin	159	-0.105756	-1.58141	0.0375783	0.145915
V$HLF_01	Forskolin	167	-0.106162	-1.577	0.063786	0.148272
V$NGFIC_01	Forskolin	129	-0.116873	-1.55702	0.0545073	0.162035
V$EGR3_01	Forskolin	40	-0.20883	-1.55395	0.049904	0.163595
GTGCAAT,MIR-25,MIR-32,MIR-92,MIR-363,MIR-367	Forskolin	211	-0.0939766	-1.55001	0.0490798	0.165827
TTCNRGNNNNTTC_V$HSF_Q6	Forskolin	85	-0.141775	-1.54955	0.058	0.165151
RRCCGTTA_UNKNOWN	Forskolin	40	-0.207365	-1.54749	0.0649606	0.165798
ATGGYGGA_UNKNOWN	Forskolin	56	-0.174117	-1.5392	0.0740741	0.171227
CCAATNNSNNNGCG_UNKNOWN	Forskolin	36	-0.211571	-1.5374	0.0467836	0.171732
TGTATGA,MIR-485-3P	Forskolin	102	-0.131139	-1.53677	0.0521042	0.171323
TGAGATT,MIR-216	Forskolin	79	-0.148101	-1.52935	0.0681818	0.176131
TAAYNRNNTCC_UNKNOWN	Forskolin	102	-0.126414	-1.52482	0.0609756	0.178757
V$ALPHACP1_01	Forskolin	140	-0.109055	-1.52075	0.0730689	0.181241
AGCTCCT,MIR-28	Forskolin	47	-0.185434	-1.51961	0.0598802	0.18111
AACWWCAANK_UNKNOWN	Forskolin	73	-0.153743	-1.51679	0.0650407	0.182463
AATGTGA,MIR-23A,MIR-23B	Forskolin	299	-0.076417	-1.50948	0.0766283	0.187473
V$STAT1_02	Forskolin	131	-0.115751	-1.50755	0.0673469	0.18827
V$IRF7_01	Forskolin	148	-0.105624	-1.49894	0.062753	0.194876
ATAACCT,MIR-154	Forskolin	41	-0.195376	-1.49338	0.082495	0.198627
GCTTGAA,MIR-498	Forskolin	87	-0.136792	-1.48553	0.0775681	0.204752
AGGAGTG,MIR-483	Forskolin	49	-0.178823	-1.48481	0.083499	0.204283
V$CEBP_Q2	Forskolin	148	-0.104676	-1.47137	0.0919765	0.215486
V$AP2_Q3	Forskolin	141	-0.106469	-1.45627	0.0769231	0.229087
TTGGGAG,MIR-150	Forskolin	52	-0.169692	-1.45084	0.0876827	0.23344
GTTGNYNNRGNAAC_UNKNOWN	Forskolin	42	-0.190605	-1.44922	0.0921569	0.233877
WGTTNNNNNAAA_UNKNOWN	Forskolin	323	-0.0703596	-1.44774	0.083503	0.234189
CYTAGCAAY_UNKNOWN	Forskolin	74	-0.140635	-1.44733	0.0725806	0.233436
V$MAX_01	Forskolin	146	-0.102064	-1.44663	0.0846774	0.232885
YGCGYRCGC_UNKNOWN	Forskolin	159	-0.0979947	-1.44579	0.0737864	0.23246
CCCACAT,MIR-299-3P	Forskolin	36	-0.206389	-1.4435	0.0856574	0.233699
V$HIF1_Q5	Forskolin	143	-0.101695	-1.43153	0.0833333	0.244492
ATCMNTCCGY_UNKNOWN	Forskolin	30	-0.217985	-1.43134	0.0914397	0.243519
V$USF_Q6_01	Forskolin	124	-0.111796	-1.4284	0.0935551	0.245401
CACTGCC,MIR-34A,MIR-34C,MIR-449	Forskolin	182	-0.0917077	-1.42662	0.0943775	0.245897
ACTGTAG,MIR-139	Forskolin	91	-0.128804	-1.41917	0.113503	0.252344
GGCAGTG,MIR-324-3P	Forskolin	63	-0.149998	-1.41424	0.0918164	0.256263
V$PR_01	Forskolin	82	-0.133977	-1.41183	0.116142	0.257392
SMTTTTGT_UNKNOWN	Forskolin	249	-0.0770537	-1.41111	0.0777538	0.256973
TAGGTCA,MIR-192,MIR-215	Forskolin	34	-0.201502	-1.40793	0.0936255	0.259103
GTAGGCA,MIR-189	Forskolin	18	-0.275732	-1.40737	0.0975104	0.258334
CCAWNWWNNNGGC_UNKNOWN	Forskolin	44	-0.172589	-1.4056	0.108911	0.259124
V$ICSBP_Q6	Forskolin	140	-0.103121	-1.40435	0.108779	0.259132
V$AR_02	Forskolin	21	-0.25614	-1.40316	0.110204	0.259047
AGGGCAG,MIR-18A	Forskolin	84	-0.126781	-1.39372	0.103922	0.268073
V$TAXCREB_01	Forskolin	78	-0.134664	-1.39332	0.110187	0.267234
V$WHN_B	Forskolin	141	-0.101479	-1.39077	0.113684	0.26898
GAGCCAG,MIR-149	Forskolin	95	-0.122914	-1.38927	0.108652	0.269379
V$NERF_Q2	Forskolin	130	-0.101228	-1.38823	0.0955285	0.269254
CTCTGGA,MIR-520A,MIR-525	Forskolin	99	-0.118954	-1.38526	0.115538	0.271122
ATTACAT,MIR-380-3P	Forskolin	78	-0.132504	-1.38377	0.104938	0.27157
V$USF_Q6	Forskolin	139	-0.10042	-1.38197	0.111828	0.272367
V$ATF_01	Forskolin	146	-0.0982175	-1.37834	0.124016	0.275118
ATGTAGC,MIR-221,MIR-222	Forskolin	85	-0.127499	-1.37516	0.106212	0.277543
GGCACTT,MIR-519E	Forskolin	81	-0.129515	-1.3739	0.117534	0.277714
GKCGCNNNNNNNTGAYG_UNKNOWN	Forskolin	36	-0.195367	-1.3671	0.120623	0.284254
CTAGGAA,MIR-384	Forskolin	47	-0.168873	-1.36544	0.116601	0.284745
ACCAATC,MIR-509	Forskolin	22	-0.239448	-1.36396	0.115914	0.285193
V$CREB_Q2	Forskolin	147	-0.094506	-1.35774	0.134855	0.291271
ACAACTT,MIR-382	Forskolin	51	-0.162154	-1.35713	0.102161	0.290689
AAGCACT,MIR-520F	Forskolin	162	-0.0918269	-1.35583	0.112403	0.290792
ACAGGGT,MIR-10A,MIR-10B	Forskolin	95	-0.117384	-1.35209	0.137931	0.294128
GAGCCTG,MIR-484	Forskolin	60	-0.146281	-1.34619	0.11336	0.300275
TTCCGTT,MIR-191	Forskolin	21	-0.247697	-1.34508	0.152047	0.300276
SNACANNNYSYAGA_UNKNOWN	Forskolin	36	-0.190131	-1.34072	0.135903	0.304294
V$MYCMAX_02	Forskolin	156	-0.0912245	-1.34018	0.1409	0.303659
GCTGAGT,MIR-512-5P	Forskolin	29	-0.206205	-1.33958	0.150713	0.303069
GAANYNYGACNY_UNKNOWN	Forskolin	39	-0.181655	-1.33084	0.139875	0.312618
GGCCAGT,MIR-193A,MIR-193B	Forskolin	63	-0.143468	-1.32709	0.142857	0.315781
TGACAGNY_V$MEIS1_01	Forskolin	490	-0.0522658	-1.32558	0.139165	0.316125
V$FXR_Q3	Forskolin	63	-0.140134	-1.32413	0.14053	0.316442
V$E2F_01	Forskolin	44	-0.173313	-1.32093	0.150198	0.319009
GTACAGG,MIR-486	Forskolin	38	-0.181793	-1.31779	0.139959	0.321549
V$CP2_01	Forskolin	122	-0.102549	-1.31067	0.137725	0.329057
ACTWSNACTNY_UNKNOWN	Forskolin	41	-0.172186	-1.29863	0.171079	0.343403
V$RFX1_01	Forskolin	133	-0.100025	-1.29087	0.172962	0.352364
AGTTCTC,MIR-146A,MIR-146B	Forskolin	40	-0.172036	-1.28591	0.173196	0.35732
V$CACCCBINDINGFACTOR_Q6	Forskolin	139	-0.093484	-1.27956	0.160677	0.364541
V$HIF1_Q3	Forskolin	133	-0.0968985	-1.27944	0.172557	0.363168
V$MYCMAX_01	Forskolin	134	-0.0926858	-1.27445	0.176113	0.368579
V$TGIF_01	Forskolin	139	-0.0928312	-1.27306	0.17	0.36895
V$PAX5_01	Forskolin	95	-0.11149	-1.27037	0.168016	0.371281
TACAATC,MIR-508	Forskolin	50	-0.152421	-1.2697	0.18254	0.370666
V$MAF_Q6	Forskolin	153	-0.0878586	-1.26937	0.18239	0.36957
RYTGCNNRGNAAC_V$MIF1_01	Forskolin	43	-0.166201	-1.26824	0.196393	0.369819
V$TFIII_Q6	Forskolin	106	-0.106907	-1.26651	0.186	0.370812
AGGTGCA,MIR-500	Forskolin	65	-0.131965	-1.25745	0.185687	0.38181
V$PITX2_Q2	Forskolin	158	-0.0854584	-1.25141	0.19305	0.389334
AAGWWRNYGGC_UNKNOWN	Forskolin	60	-0.13526	-1.2482	0.1875	0.392265
CTTGTAT,MIR-381	Forskolin	142	-0.0915115	-1.24818	0.197239	0.390735
V$CACBINDINGPROTEIN_Q6	Forskolin	118	-0.0980824	-1.24722	0.185404	0.390484
V$SP3_Q3	Forskolin	127	-0.0935977	-1.24421	0.19774	0.393422
V$MYB_Q5_01	Forskolin	148	-0.088206	-1.23842	0.204453	0.400534
CAGTCAC,MIR-134	Forskolin	34	-0.180054	-1.23741	0.20202	0.400317
V$HNF4_01_B	Forskolin	141	-0.0887003	-1.23037	0.231827	0.409416
V$STAT3_02	Forskolin	75	-0.118247	-1.22703	0.213147	0.412855
AAACCAC,MIR-140	Forskolin	70	-0.127389	-1.22197	0.222222	0.418932
V$SRY_02	Forskolin	152	-0.0828904	-1.22092	0.208333	0.418993
V$MZF1_01	Forskolin	126	-0.0921148	-1.21865	0.234405	0.420851
V$NFY_Q6	Forskolin	132	-0.0914388	-1.20511	0.229703	0.439565
ACAACCT,MIR-453	Forskolin	31	-0.177758	-1.19996	0.208421	0.445931
V$AR_03	Forskolin	38	-0.168494	-1.19945	0.231733	0.445018
TCCATTKW_UNKNOWN	Forskolin	139	-0.0869713	-1.19783	0.238372	0.445966
V$HMX1_01	Forskolin	22	-0.213299	-1.19644	0.242798	0.446666
GTGCAAA,MIR-507	Forskolin	96	-0.103794	-1.19585	0.233083	0.446011
GCTCTTG,MIR-335	Forskolin	61	-0.12928	-1.19396	0.224066	0.447135
GTCAGGA,MIR-378	Forskolin	31	-0.181485	-1.19178	0.249049	0.448975
V$EGR2_01	Forskolin	105	-0.0989658	-1.19109	0.237094	0.448438
AAGCACA,MIR-218	Forskolin	272	-0.0617921	-1.18728	0.237643	0.452861
V$PBX1_02	Forskolin	88	-0.107593	-1.18675	0.236538	0.45205
V$SP1_Q2_01	Forskolin	132	-0.088425	-1.18259	0.239923	0.457063
V$CDC5_01	Forskolin	171	-0.0788671	-1.18208	0.254941	0.456178
V$VDR_Q3	Forskolin	113	-0.0937641	-1.17853	0.233792	0.460005
GGAANCGGAANY_UNKNOWN	Forskolin	57	-0.133182	-1.17697	0.255578	0.460644
CTGAGCC,MIR-24	Forskolin	134	-0.0862015	-1.17696	0.250493	0.458987
ACAWYAAAG_UNKNOWN	Forskolin	65	-0.124449	-1.17325	0.254132	0.463066
V$LYF1_01	Forskolin	148	-0.0828135	-1.17319	0.252354	0.461519
V$PU1_Q6	Forskolin	125	-0.0894765	-1.17145	0.23617	0.462498
CCTGAGT,MIR-510	Forskolin	29	-0.185723	-1.17138	0.252988	0.461009
YTCCCRNNAGGY_UNKNOWN	Forskolin	36	-0.169524	-1.17052	0.271008	0.460809
V$STAT_Q6	Forskolin	135	-0.0858175	-1.16852	0.26294	0.462308
V$PR_02	Forskolin	86	-0.109985	-1.1677	0.265979	0.462113
AAGTCCA,MIR-422B,MIR-422A	Forskolin	46	-0.143893	-1.1661	0.257202	0.463004
TATCTGG,MIR-488	Forskolin	42	-0.152165	-1.16345	0.246602	0.465554
V$ATF6_01	Forskolin	66	-0.125112	-1.15931	0.26569	0.470598
KMCATNNWGGA_UNKNOWN	Forskolin	55	-0.131507	-1.1587	0.267223	0.470089
V$POU6F1_01	Forskolin	143	-0.0821136	-1.15678	0.255361	0.471535
V$CHOP_01	Forskolin	144	-0.0831356	-1.15657	0.267465	0.470323
V$MYB_Q6	Forskolin	139	-0.0822758	-1.15648	0.254864	0.46884
V$HTF_01	Forskolin	39	-0.159936	-1.15316	0.242915	0.472274
GTGCCAA,MIR-96	Forskolin	209	-0.0700369	-1.15181	0.248971	0.472707
V$NFKB_Q6_01	Forskolin	111	-0.0937683	-1.14796	0.292829	0.477163
ACTGCCT,MIR-34B	Forskolin	149	-0.0804275	-1.14658	0.291165	0.477904
V$MYB_Q3	Forskolin	135	-0.0857966	-1.1463	0.255319	0.476795
V$STAT1_03	Forskolin	131	-0.0858619	-1.14332	0.275862	0.479782
V$EN1_01	Forskolin	66	-0.118016	-1.14202	0.282869	0.480248
CTCAAGA,MIR-526B	Forskolin	44	-0.147996	-1.13801	0.302469	0.485211
V$NMYC_01	Forskolin	146	-0.0799788	-1.13615	0.281746	0.486713
ATATGCA,MIR-448	Forskolin	149	-0.0807787	-1.13546	0.26945	0.486362
V$ER_Q6	Forskolin	160	-0.0767707	-1.13205	0.2751	0.490488
V$IRF_Q6	Forskolin	125	-0.0852496	-1.13146	0.281071	0.489888
V$HNF4ALPHA_Q6	Forskolin	146	-0.0811863	-1.13137	0.295359	0.488441
V$LXR_Q3	Forskolin	42	-0.146576	-1.13026	0.299213	0.488615
V$AHR_Q5	Forskolin	111	-0.0934655	-1.13008	0.308765	0.487359
V$IRF1_Q6	Forskolin	148	-0.0806957	-1.12759	0.286013	0.489583
V$SRY_01	Forskolin	120	-0.0887141	-1.12738	0.296907	0.48839
CCATCCA,MIR-432	Forskolin	40	-0.151239	-1.12646	0.286902	0.48843
V$CDP_01	Forskolin	50	-0.133639	-1.12616	0.306	0.487426
ACTGTGA,MIR-27A,MIR-27B	Forskolin	335	-0.0536311	-1.12397	0.282869	0.489341
CATTGTYY_V$SOX9_B1	Forskolin	214	-0.0651504	-1.12343	0.273973	0.488587
V$CMYB_01	Forskolin	136	-0.0835747	-1.12131	0.313008	0.490282
CCTGCTG,MIR-214	Forskolin	137	-0.082736	-1.12049	0.31185	0.49007
TATTATA,MIR-374	Forskolin	210	-0.0667623	-1.11754	0.298828	0.493301
V$PAX4_01	Forskolin	148	-0.079759	-1.11535	0.312253	0.495306
V$LMO2COM_02	Forskolin	141	-0.0793996	-1.10828	0.331361	0.505187
V$IK1_01	Forskolin	167	-0.0728905	-1.10405	0.324219	0.510647
GGGCATT,MIR-365	Forskolin	83	-0.102098	-1.1022	0.314779	0.512319
V$TFIIA_Q6	Forskolin	144	-0.0784356	-1.10064	0.304527	0.513083
TTANWNANTGGM_UNKNOWN	Forskolin	40	-0.146013	-1.0992	0.335984	0.513758
V$YY1_01	Forskolin	148	-0.0785569	-1.09793	0.338462	0.514366
GGCACAT,MIR-455	Forskolin	34	-0.158005	-1.09667	0.340206	0.514919
V$ETS2_B	Forskolin	141	-0.0794474	-1.0924	0.331992	0.520401
V$NKX61_01	Forskolin	134	-0.0807659	-1.09056	0.327044	0.521708
V$CDPCR1_01	Forskolin	78	-0.10359	-1.08785	0.348425	0.524597
CATRRAGC_UNKNOWN	Forskolin	77	-0.103716	-1.08485	0.328767	0.527972
AGCATTA,MIR-155	Forskolin	96	-0.0949187	-1.08332	0.337607	0.528934
ATAAGCT,MIR-21	Forskolin	89	-0.098624	-1.08322	0.331349	0.527485
V$P53_DECAMER_Q2	Forskolin	148	-0.0750461	-1.08067	0.33	0.530272
CAAGGAT,MIR-362	Forskolin	44	-0.135396	-1.08006	0.352941	0.529634
V$SOX5_01	Forskolin	170	-0.0707227	-1.07128	0.350202	0.543079
V$CREBP1CJUN_01	Forskolin	152	-0.0737924	-1.07109	0.327451	0.541792
GTTNYYNNGGTNA_UNKNOWN	Forskolin	40	-0.141995	-1.06779	0.337864	0.546126
TCTATGA,MIR-376A,MIR-376B	Forskolin	63	-0.11595	-1.0649	0.37931	0.549449
TCCCCAC,MIR-491	Forskolin	38	-0.143046	-1.06412	0.36518	0.549222
V$SPZ1_01	Forskolin	129	-0.0836405	-1.06274	0.371308	0.550068
GGCAGAC,MIR-346	Forskolin	24	-0.181328	-1.06155	0.352475	0.550502
V$PAX2_01	Forskolin	22	-0.187021	-1.06007	0.391304	0.551432
CTACTAG,MIR-325	Forskolin	16	-0.216531	-1.05977	0.367387	0.550334
V$PPARA_01	Forskolin	21	-0.191943	-1.05127	0.377049	0.562783
V$LEF1_Q2	Forskolin	123	-0.0803587	-1.05126	0.38	0.561161
V$MEIS1_01	Forskolin	137	-0.0761836	-1.04779	0.410853	0.565341
V$NKX22_01	Forskolin	119	-0.0816866	-1.04624	0.389113	0.566405
V$ISRE_01	Forskolin	122	-0.0811876	-1.04433	0.376471	0.567953
V$SP1_Q4_01	Forskolin	133	-0.0768987	-1.03501	0.401186	0.582622
V$HFH8_01	Forskolin	128	-0.078497	-1.03229	0.406439	0.585571
V$CREB_02	Forskolin	143	-0.0757058	-1.03215	0.394683	0.584086
YRCCAKNNGNCGC_UNKNOWN	Forskolin	36	-0.146599	-1.02674	0.392505	0.59196
CACCAGC,MIR-138	Forskolin	132	-0.0765061	-1.02647	0.405797	0.590764
V$CREB_01	Forskolin	147	-0.0715971	-1.023	0.425703	0.595287
ATCTTGC,MIR-31	Forskolin	47	-0.124353	-1.0202	0.409091	0.598696
V$SP1_01	Forskolin	122	-0.0782996	-1.01843	0.412731	0.600076
V$CREBP1_01	Forskolin	107	-0.0836773	-1.01132	0.431727	0.611263
CAGCCTC,MIR-485-5P	Forskolin	81	-0.0937011	-1.0105	0.420744	0.610976
TCATCTC,MIR-143	Forskolin	105	-0.0851363	-1.00914	0.435685	0.61161
CCCAGAG,MIR-326	Forskolin	101	-0.0873012	-1.00896	0.440816	0.610198
V$EGR_Q6	Forskolin	148	-0.071072	-1.00886	0.388571	0.60869
V$FOXO4_01	Forskolin	147	-0.0709331	-1.00515	0.442387	0.613932
CAATGCA,MIR-33	Forskolin	77	-0.0969354	-1.00256	0.424125	0.616746
V$SMAD4_Q6	Forskolin	120	-0.0803157	-1.00188	0.441955	0.616401
V$MAZR_01	Forskolin	104	-0.0833579	-0.998187	0.454894	0.621391
GGGNNTTTCC_V$NFKB_Q6_01	Forskolin	73	-0.0990352	-0.993893	0.441459	0.627538
WWTAAGGC_UNKNOWN	Forskolin	79	-0.0951685	-0.992883	0.445564	0.627649
V$NFKAPPAB65_01	Forskolin	119	-0.0782586	-0.992349	0.460501	0.626926
V$GATA4_Q3	Forskolin	146	-0.0699215	-0.990646	0.439331	0.628316
AAGCCAT,MIR-135A,MIR-135B	Forskolin	225	-0.0570062	-0.989147	0.457086	0.629183
TGCTGAY_UNKNOWN	Forskolin	305	-0.0493471	-0.987123	0.435453	0.63097
TCTGGAC,MIR-198	Forskolin	53	-0.113182	-0.984842	0.471074	0.633534
V$PAX8_01	Forskolin	15	-0.209676	-0.984307	0.453416	0.632681
AATGGAG,MIR-136	Forskolin	51	-0.11628	-0.983602	0.445545	0.632217
CRGAARNNNNCGA_UNKNOWN	Forskolin	25	-0.161529	-0.976377	0.46184	0.643113
CCCNNGGGAR_V$OLF1_01	Forskolin	168	-0.0630514	-0.972674	0.477046	0.647946
V$NFKAPPAB_01	Forskolin	113	-0.0763503	-0.972671	0.465619	0.646225
GGTGTGT,MIR-329	Forskolin	66	-0.102383	-0.970504	0.447154	0.64839
V$E4BP4_01	Forskolin	135	-0.0709094	-0.968654	0.443787	0.649827
V$TEF1_Q6	Forskolin	127	-0.0742955	-0.968089	0.489919	0.64913
V$AML1_01	Forskolin	134	-0.0718856	-0.965146	0.466926	0.652603
V$FOXJ2_02	Forskolin	141	-0.0698895	-0.964112	0.496032	0.652617
AGTCTTA,MIR-499	Forskolin	49	-0.116376	-0.96281	0.483403	0.653208
V$CREB_Q4	Forskolin	146	-0.0677309	-0.956516	0.489712	0.662622
V$PEA3_Q6	Forskolin	128	-0.0731522	-0.956307	0.486762	0.661256
V$FOXD3_01	Forskolin	125	-0.0729255	-0.955768	0.49004	0.660486
V$DR4_Q2	Forskolin	131	-0.0720511	-0.955523	0.515275	0.659177
RACTNNRTTTNC_UNKNOWN	Forskolin	58	-0.109854	-0.954389	0.508439	0.659481
GGTAACC,MIR-409-5P	Forskolin	24	-0.164548	-0.952136	0.492218	0.66169
GTGTTGA,MIR-505	Forskolin	65	-0.097379	-0.946451	0.48847	0.670211
V$AREB6_02	Forskolin	136	-0.0710564	-0.945326	0.515337	0.670512
V$AML1_Q6	Forskolin	134	-0.0718856	-0.944936	0.528958	0.669524
GATGKMRGCG_UNKNOWN	Forskolin	38	-0.130451	-0.944849	0.521649	0.668017
V$IRF1_01	Forskolin	143	-0.0676829	-0.944786	0.498925	0.666424
V$TITF1_Q3	Forskolin	145	-0.0673291	-0.944156	0.506958	0.665887
CTGTTAC,MIR-194	Forskolin	76	-0.0910523	-0.942196	0.525591	0.667644
STTTCRNTTT_V$IRF_Q6	Forskolin	103	-0.0786777	-0.941463	0.53629	0.667183
V$HSF2_01	Forskolin	136	-0.0700305	-0.941194	0.518164	0.665973
V$AHRARNT_01	Forskolin	78	-0.0921646	-0.940927	0.505241	0.664708
WYAAANNRNNNGCG_UNKNOWN	Forskolin	33	-0.136331	-0.940594	0.51497	0.663614
V$NFKB_Q6	Forskolin	136	-0.0691685	-0.936886	0.517787	0.668582
V$CEBP_Q3	Forskolin	142	-0.0682025	-0.933158	0.495146	0.673579
V$SP1_Q6	Forskolin	130	-0.0700514	-0.927192	0.538314	0.682601
TAGAACC,MIR-182	Forskolin	22	-0.166874	-0.925542	0.543434	0.683938
V$CREB_Q3	Forskolin	148	-0.0661515	-0.923647	0.55579	0.685575
CCTGTGA,MIR-513	Forskolin	73	-0.0936945	-0.923572	0.529865	0.683982
V$NF1_Q6	Forskolin	149	-0.0644831	-0.919937	0.552083	0.68884
V$PPAR_DR1_Q2	Forskolin	134	-0.0693679	-0.918403	0.535645	0.689979
WTTGKCTG_UNKNOWN	Forskolin	292	-0.0472543	-0.918003	0.546906	0.688843
TTAYRTAA_V$E4BP4_01	Forskolin	157	-0.0614038	-0.916974	0.556468	0.688927
V$HNF4_01	Forskolin	152	-0.0631274	-0.913295	0.569959	0.693215
V$HFH4_01	Forskolin	137	-0.067379	-0.908897	0.575569	0.699115
ATGTCAC,MIR-489	Forskolin	60	-0.102585	-0.908777	0.571717	0.697609
GGGACCA,MIR-133A,MIR-133B	Forskolin	110	-0.0748658	-0.906244	0.579256	0.700413
V$SMAD_Q6	Forskolin	144	-0.0642554	-0.904389	0.563147	0.701884
V$LEF1_Q6	Forskolin	156	-0.0618728	-0.901472	0.585987	0.70538
CTCNANGTGNY_UNKNOWN	Forskolin	45	-0.112756	-0.899724	0.581933	0.706683
ATGCTGC,MIR-103,MIR-107	Forskolin	141	-0.0641719	-0.898122	0.5762	0.708028
V$USF_C	Forskolin	161	-0.0610219	-0.893341	0.55098	0.71453
V$LXR_DR4_Q3	Forskolin	46	-0.109854	-0.892913	0.587174	0.713545
V$PAX6_01	Forskolin	55	-0.103731	-0.888441	0.578947	0.719334
V$DR3_Q4	Forskolin	71	-0.0897172	-0.887224	0.586639	0.7198
GTGGTGA,MIR-197	Forskolin	45	-0.110478	-0.886161	0.577465	0.719898
V$TCF11MAFG_01	Forskolin	128	-0.0667785	-0.881125	0.620758	0.726904
V$GR_01	Forskolin	122	-0.0688567	-0.879232	0.594542	0.728264
V$CREL_01	Forskolin	135	-0.0650867	-0.877805	0.598309	0.72897
RNGTGGGC_UNKNOWN	Forskolin	413	-0.0379337	-0.877052	0.601562	0.7285
V$SRF_01	Forskolin	27	-0.143375	-0.873237	0.630081	0.733267
V$NFAT_Q4_01	Forskolin	163	-0.0586062	-0.872721	0.61079	0.732448
V$CEBP_01	Forskolin	163	-0.0577156	-0.869695	0.624506	0.736011
GCGSCMNTTT_UNKNOWN	Forskolin	35	-0.121767	-0.868058	0.637965	0.737243
GTGTGAG,MIR-342	Forskolin	42	-0.11146	-0.863495	0.60757	0.743476
MYAATNNNNNNNGGC_UNKNOWN	Forskolin	78	-0.0840308	-0.861711	0.627767	0.744936
V$TST1_01	Forskolin	158	-0.0594089	-0.861543	0.63301	0.743514
CCACACA,MIR-147	Forskolin	44	-0.108489	-0.861288	0.628459	0.742194
GCAAGAC,MIR-431	Forskolin	33	-0.126419	-0.855784	0.639535	0.749807
YRTCANNRCGC_UNKNOWN	Forskolin	41	-0.112594	-0.855112	0.658052	0.749154
TCTAGAG,MIR-517	Forskolin	29	-0.13256	-0.85439	0.640078	0.748587
V$CEBP_C	Forskolin	120	-0.0656541	-0.845839	0.629707	0.761357
AGGGCCA,MIR-328	Forskolin	46	-0.104986	-0.837237	0.666667	0.774092
RGTTAMWNATT_V$HNF1_01	Forskolin	40	-0.109583	-0.835021	0.657845	0.776095
V$OLF1_01	Forskolin	133	-0.0633813	-0.834507	0.681275	0.775051
V$E4F1_Q6	Forskolin	148	-0.0583272	-0.827702	0.645793	0.784781
V$LBP1_Q6	Forskolin	121	-0.0628359	-0.827578	0.676056	0.783222
ATGCTGG,MIR-338	Forskolin	76	-0.0794748	-0.824228	0.729572	0.786908
V$HEN1_01	Forskolin	103	-0.0703063	-0.821278	0.683884	0.790037
V$RORA1_01	Forskolin	154	-0.0564196	-0.816581	0.684739	0.796061
V$PAX4_02	Forskolin	152	-0.0562976	-0.812486	0.698312	0.801058
V$HEN1_02	Forskolin	101	-0.0705712	-0.810481	0.703985	0.802632
V$STAT_01	Forskolin	138	-0.0592634	-0.809509	0.716535	0.802447
RYTAAWNNNTGAY_UNKNOWN	Forskolin	43	-0.103223	-0.806852	0.682171	0.804893
V$GATA2_01	Forskolin	63	-0.0857822	-0.802919	0.723529	0.809484
GGGATGC,MIR-324-5P	Forskolin	36	-0.110638	-0.802609	0.740286	0.808149
V$HSF_Q6	Forskolin	103	-0.0671855	-0.800941	0.713992	0.809128
V$RORA2_01	Forskolin	83	-0.0757957	-0.797056	0.707317	0.813573
CAGGTA_V$AREB6_01	Forskolin	431	-0.0338673	-0.783054	0.757895	0.83415
CTCTATG,MIR-368	Forskolin	31	-0.120166	-0.777599	0.748963	0.840884
ACCTGTTG_UNKNOWN	Forskolin	80	-0.0753092	-0.777439	0.748031	0.839269
V$SMAD3_Q6	Forskolin	118	-0.0616648	-0.776944	0.726378	0.838148
V$OCT1_06	Forskolin	163	-0.0515415	-0.775884	0.748571	0.837928
GGGNRMNNYCAT_UNKNOWN	Forskolin	47	-0.0972065	-0.774609	0.756757	0.838033
V$AR_Q2	Forskolin	78	-0.0745214	-0.773438	0.782443	0.838013
V$ELK1_01	Forskolin	119	-0.0611115	-0.768342	0.758555	0.843991
V$CIZ_01	Forskolin	136	-0.056547	-0.767687	0.75523	0.843243
V$SREBP_Q3	Forskolin	129	-0.0576515	-0.765929	0.787629	0.844057
V$DR1_Q3	Forskolin	127	-0.0570638	-0.762965	0.763314	0.84658
V$TEF_Q6	Forskolin	150	-0.0544596	-0.762529	0.77	0.845398
V$PPARA_02	Forskolin	57	-0.0851654	-0.760455	0.753372	0.846813
GCAAGGA,MIR-502	Forskolin	47	-0.0942829	-0.759709	0.771654	0.846149
V$FOXO1_01	Forskolin	154	-0.053109	-0.754451	0.780439	0.852024
V$FAC1_01	Forskolin	123	-0.0590948	-0.752636	0.740125	0.852839
V$AREB6_04	Forskolin	147	-0.0543094	-0.747046	0.788934	0.859077
V$EVI1_02	Forskolin	75	-0.071906	-0.740041	0.760163	0.867357
YGCANTGCR_UNKNOWN	Forskolin	75	-0.0734544	-0.735391	0.814103	0.872079
V$PAX2_02	Forskolin	154	-0.0508342	-0.73208	0.835341	0.874892
V$NFAT_Q6	Forskolin	142	-0.0528978	-0.725823	0.793814	0.881643
V$MYCMAX_B	Forskolin	138	-0.0518549	-0.711444	0.818898	0.899553
YAATNRNNNYNATT_UNKNOWN	Forskolin	63	-0.0768819	-0.709904	0.839175	0.899612
GTCNYYATGR_UNKNOWN	Forskolin	60	-0.0764672	-0.701092	0.827451	0.908898
V$NRF2_Q4	Forskolin	146	-0.0474067	-0.686927	0.851927	0.924726
V$BACH2_01	Forskolin	132	-0.0514066	-0.685308	0.876471	0.924706
RACCACAR_V$AML_Q6	Forskolin	141	-0.0484464	-0.678605	0.873823	0.93079
RNTCANNRNNYNATTW_UNKNOWN	Forskolin	47	-0.0839063	-0.678485	0.880716	0.92902
V$MAZ_Q6	Forskolin	103	-0.0554409	-0.663832	0.885277	0.943932
V$T3R_Q6	Forskolin	122	-0.0517565	-0.663803	0.877863	0.942013
GCCNNNWTAAR_UNKNOWN	Forskolin	85	-0.0605057	-0.660447	0.885714	0.943742
YNGTTNNNATT_UNKNOWN	Forskolin	207	-0.0389248	-0.656802	0.903226	0.94564
V$GR_Q6_01	Forskolin	159	-0.0444425	-0.653341	0.909804	0.947294
V$AHR_01	Forskolin	33	-0.096038	-0.650038	0.909639	0.948924
YGTCCTTGR_UNKNOWN	Forskolin	58	-0.0728957	-0.646702	0.921739	0.950183
V$ELF1_Q6	Forskolin	122	-0.0489005	-0.643903	0.933333	0.950885
V$CEBPB_01	Forskolin	150	-0.0455824	-0.643224	0.912525	0.949588
CTTTGCA,MIR-527	Forskolin	165	-0.0424203	-0.640112	0.916667	0.950833
GGARNTKYCCA_UNKNOWN	Forskolin	47	-0.0792683	-0.63717	0.89916	0.951632
V$IK3_01	Forskolin	129	-0.0472555	-0.631531	0.917647	0.954872
V$AP4_01	Forskolin	139	-0.0457263	-0.628503	0.924051	0.955536
CAGGGTC,MIR-504	Forskolin	57	-0.069986	-0.623862	0.926295	0.957803
V$HFH1_01	Forskolin	149	-0.0432477	-0.613732	0.945794	0.964427
V$PAX8_B	Forskolin	63	-0.0668601	-0.610247	0.906314	0.965296
GACAATC,MIR-219	Forskolin	103	-0.0522423	-0.60897	0.940083	0.964387
V$P300_01	Forskolin	125	-0.046549	-0.606381	0.937864	0.96449
V$CDPCR3HD_01	Forskolin	138	-0.043801	-0.597217	0.952107	0.969375
V$AP2REP_01	Forskolin	85	-0.0552361	-0.595775	0.958084	0.968389
CTCTAGA,MIR-526C,MIR-518F,MIR-526A	Forskolin	33	-0.0869432	-0.592953	0.940711	0.96845
V$STAT5A_02	Forskolin	81	-0.0572864	-0.592226	0.93295	0.966977
V$AML_Q6	Forskolin	136	-0.0436795	-0.591078	0.938104	0.965872
YTTCCNNNGGAMR_UNKNOWN	Forskolin	29	-0.0894178	-0.566983	0.963035	0.97853
V$OSF2_Q6	Forskolin	145	-0.0398648	-0.565126	0.97307	0.977558
V$AP2_Q6_01	Forskolin	131	-0.0407145	-0.559753	0.963855	0.978501
CTACCTC,LET-7A,LET-7B,LET-7C,LET-7D,LET-7E,LET-7F,MIR-98,LET-7G,LET-7I	Forskolin	241	-0.0293678	-0.537582	0.975309	0.986392
CCCNNNNNNAAGWT_UNKNOWN	Forskolin	53	-0.060986	-0.534657	0.983903	0.985563
V$AFP1_Q6	Forskolin	154	-0.0349156	-0.517533	0.984375	0.98932
AGGAAGC,MIR-516-3P	Forskolin	70	-0.0451704	-0.435828	0.996047	1
V$FOXO3_01	Forskolin	137	-0.0265892	-0.364449	1	0.999936
